# Supplementary material for: ABHD11, a new diacylglycerol lipase involved in weight gain regulation
Source: PubMed Central journal article supplement (PMC7313976; doi:10.1371/journal.pone.0234780), 2020-06-24
Supplement: pone.0234780.s003.pdf [file pone.0234780.s003.pdf]

Figure 2

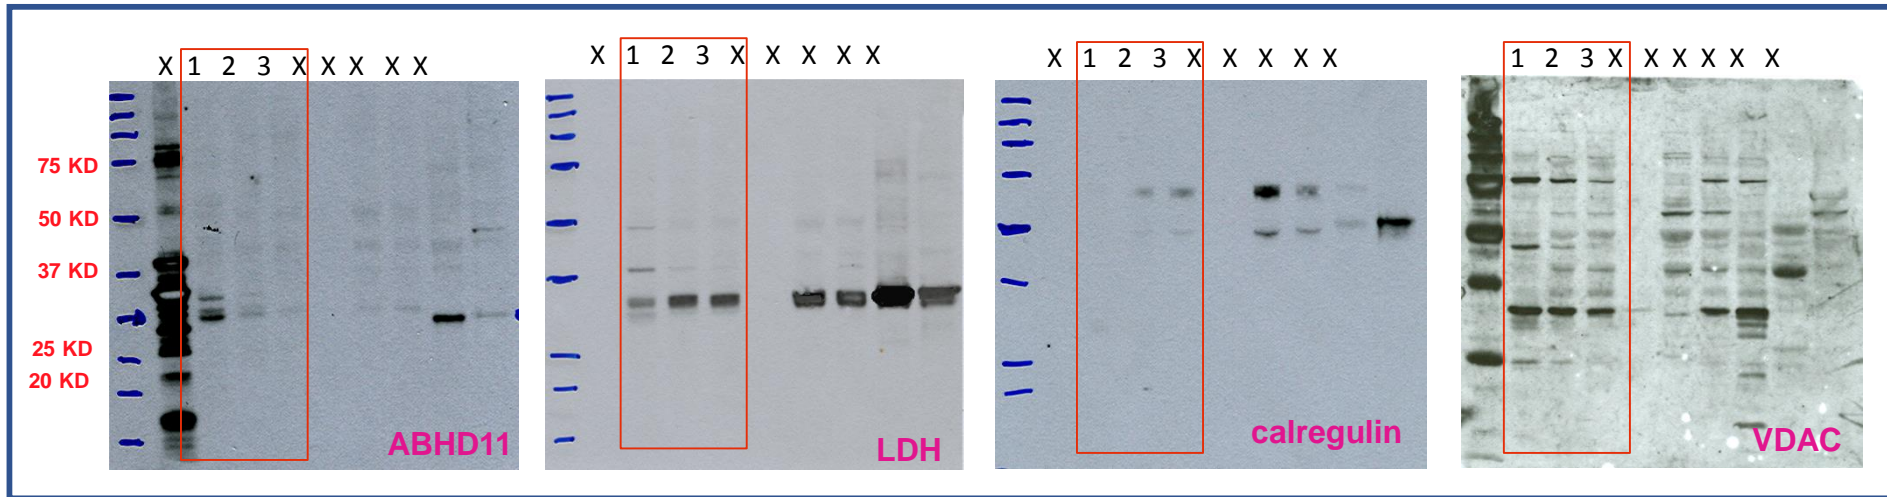

Raw image for Figure 2 : WB. Blot scan performed on a scanner Typhoon (Amersham)

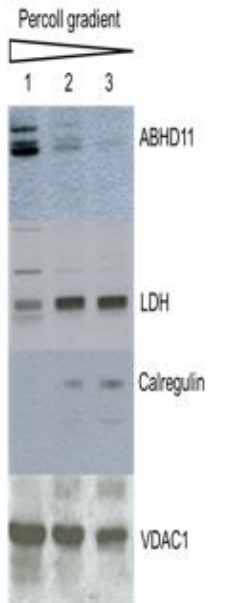

figure S1-B blot A

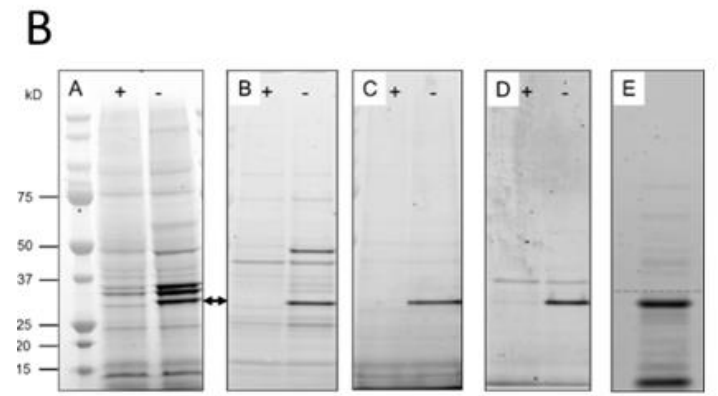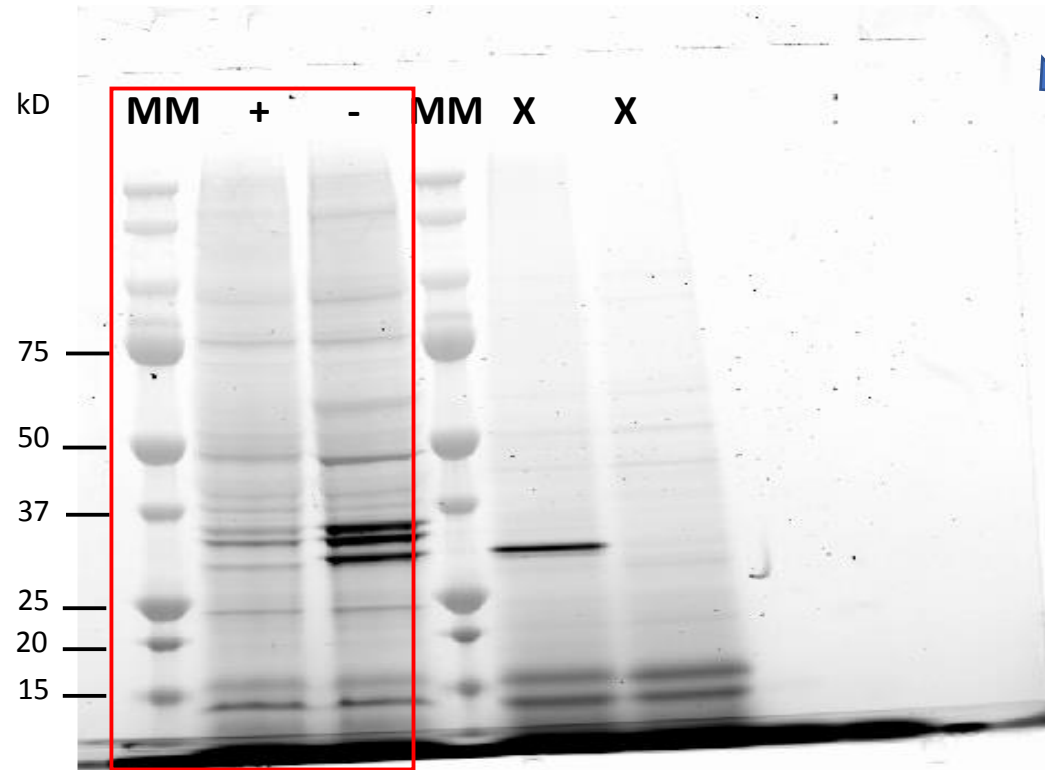

Raw blot figure S1-B blot A. Blot scan performed on a scanner Typhoon (Amersham)

Figure S1-B blot B

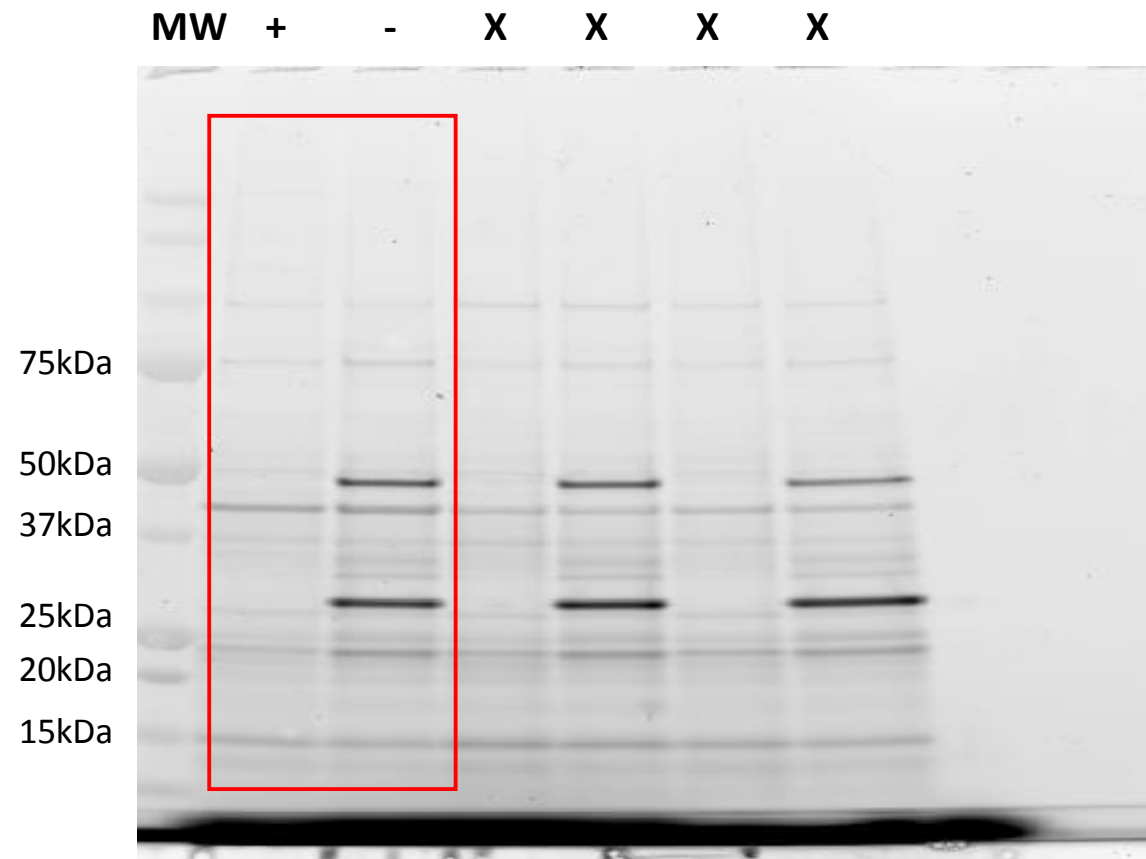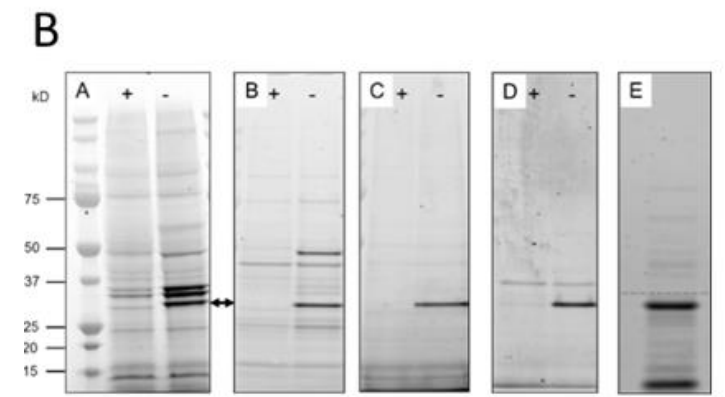

Raw blot figure S1-B blot B. Blot scan performed on a scanner Typhoon (Amersham)

figure S1-B blot C

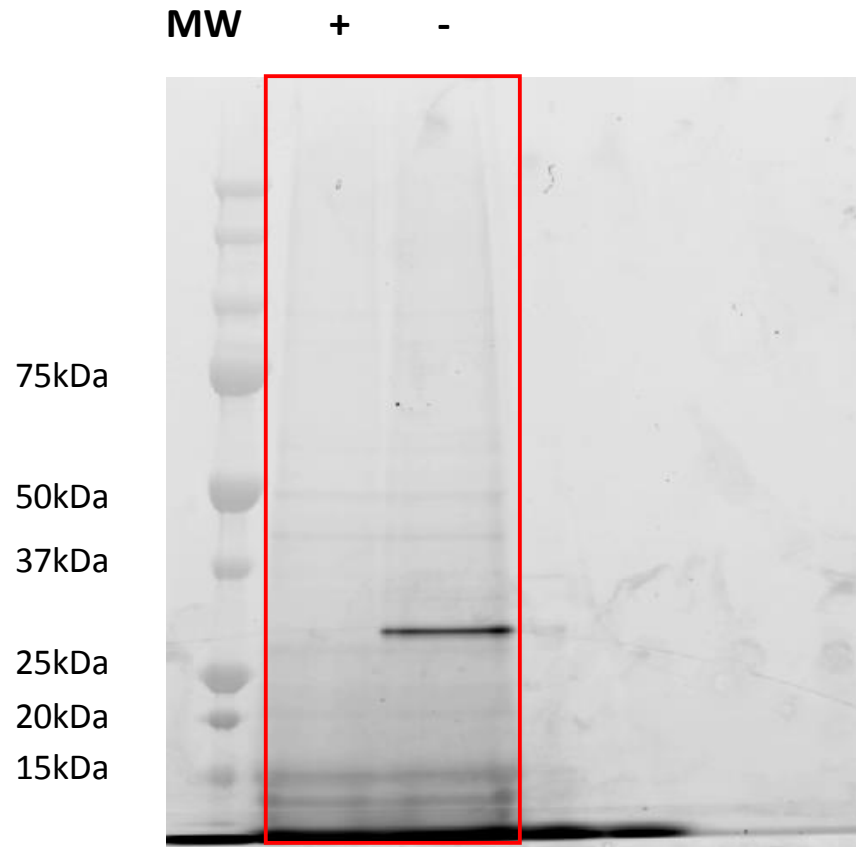

Raw blot figure S1-B blot C. Blot scan performed on a scanner Typhoon (Amersham)

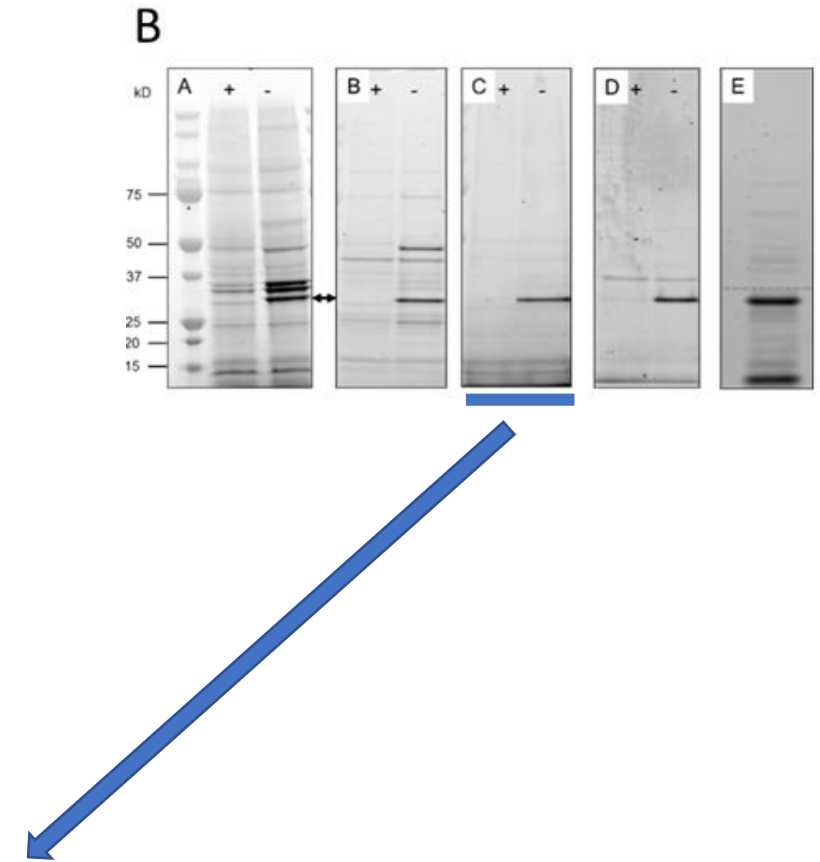

figure S1-B blot D

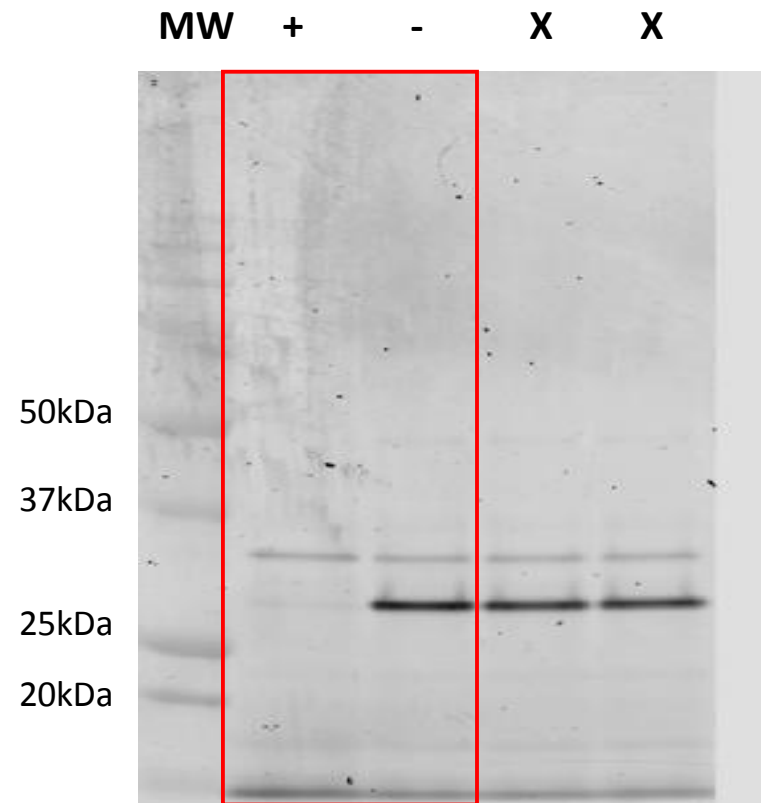

Raw blot figure S1-B blot D. Blot scan performed on a scanner Typhoon (Amersham)

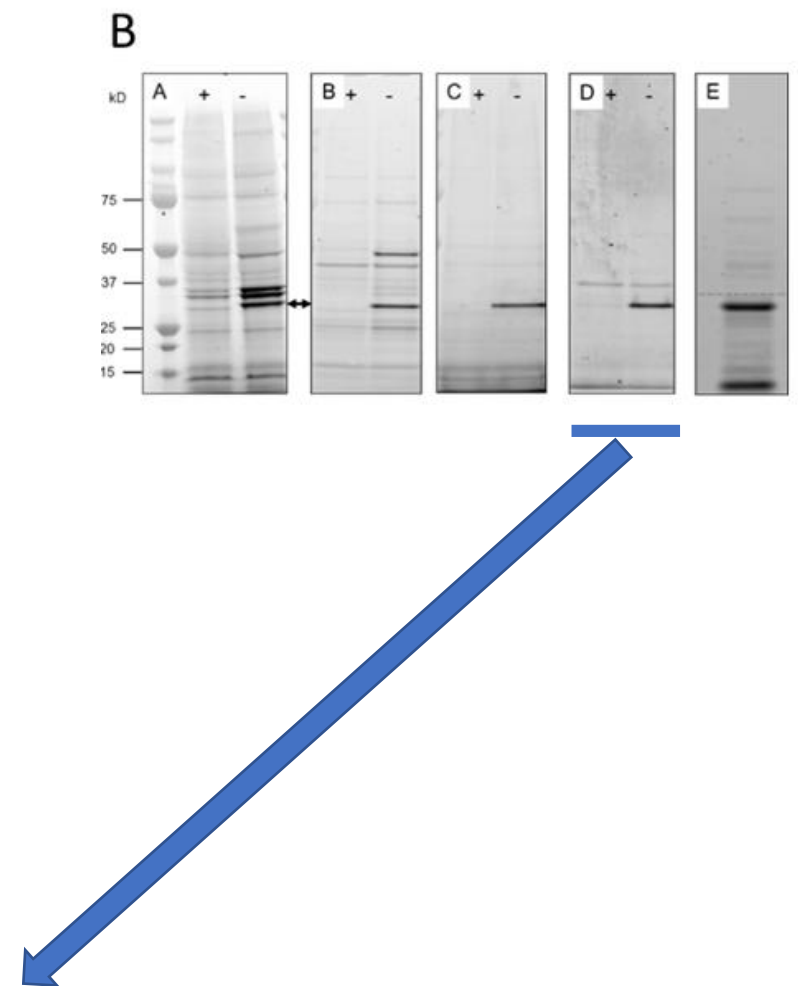

figure S1-B blot E

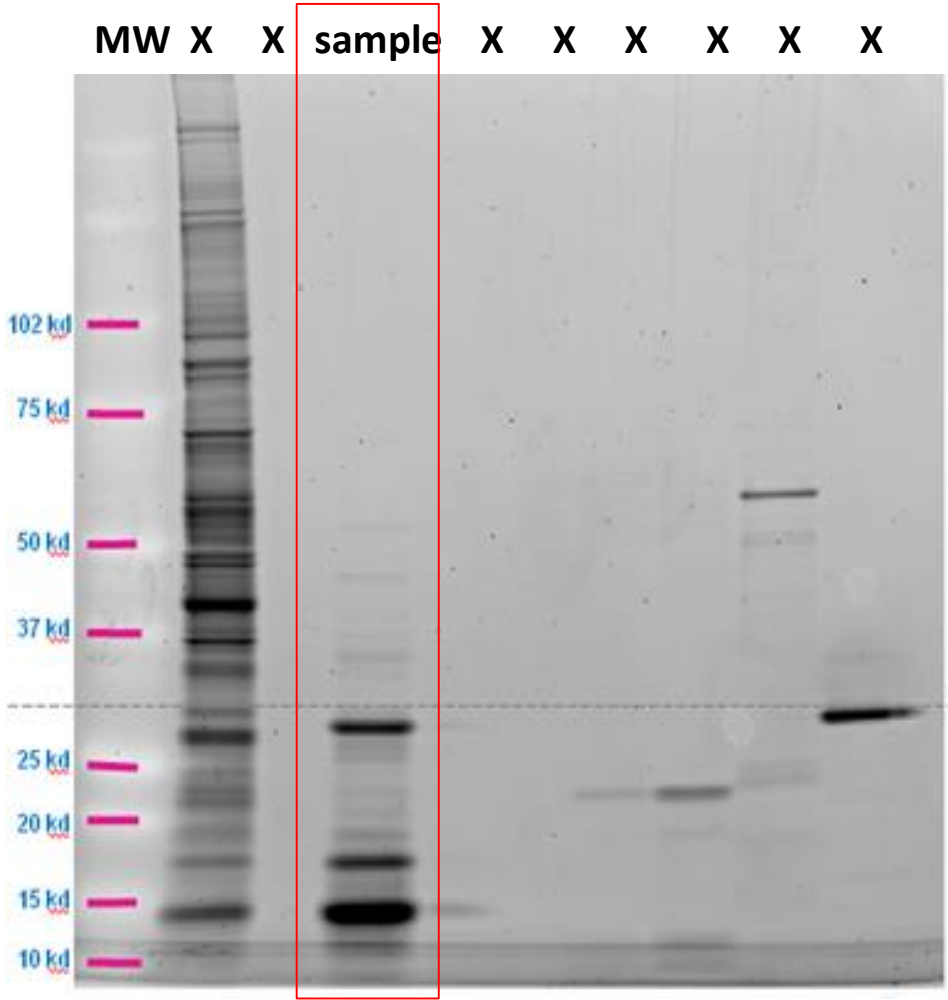

Raw blot figure S1-B blot E. Blot scan performed on a scanner Typhoon (Amersham)

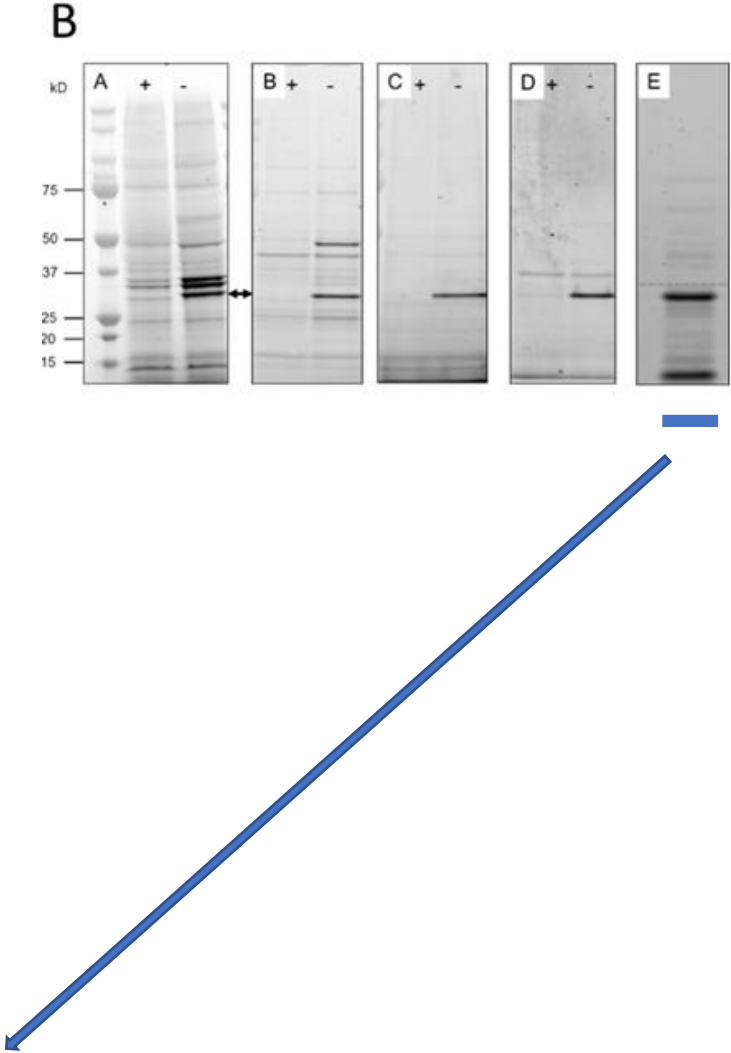

figure S1-C

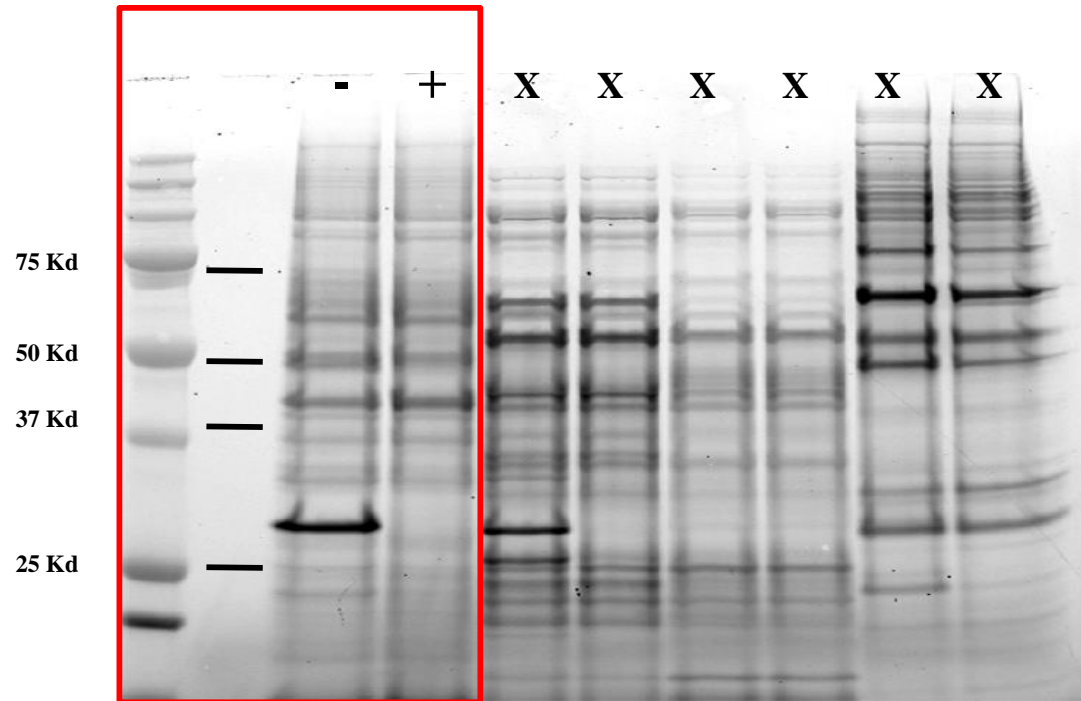

Raw blot figure S1-C. Blot scan performed on a scanner Typhoon (Amersham)

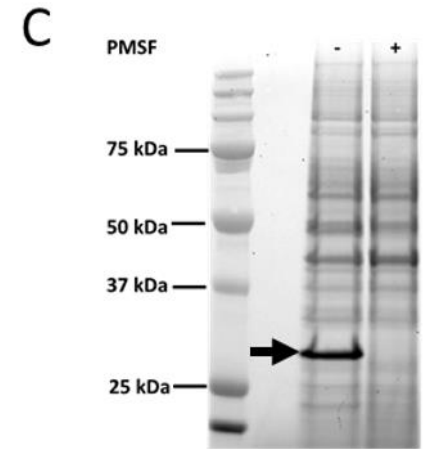

Figure S3C

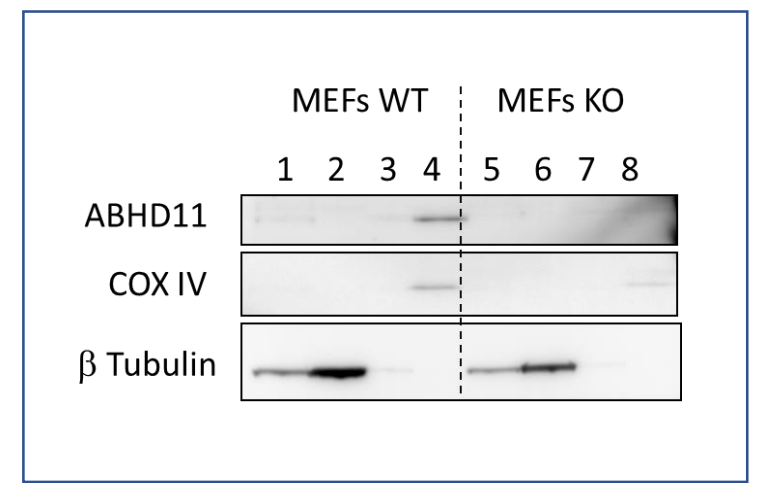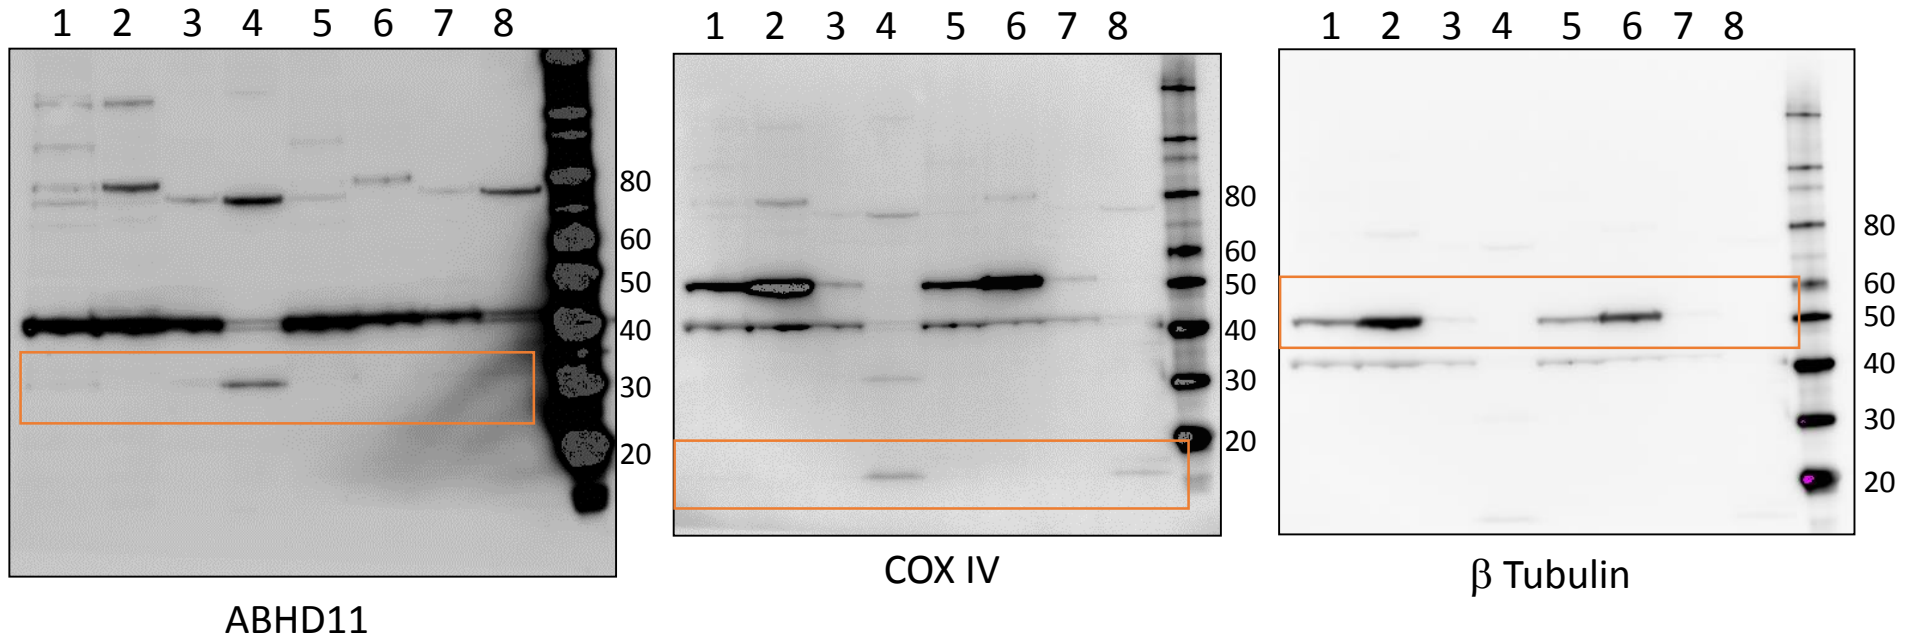

Raw images figure S3-C: Blot scan performed with imager LAS3000, FujiFilm. ECL



Figure S4B

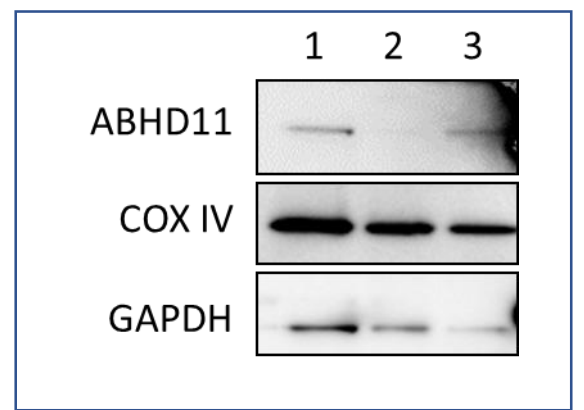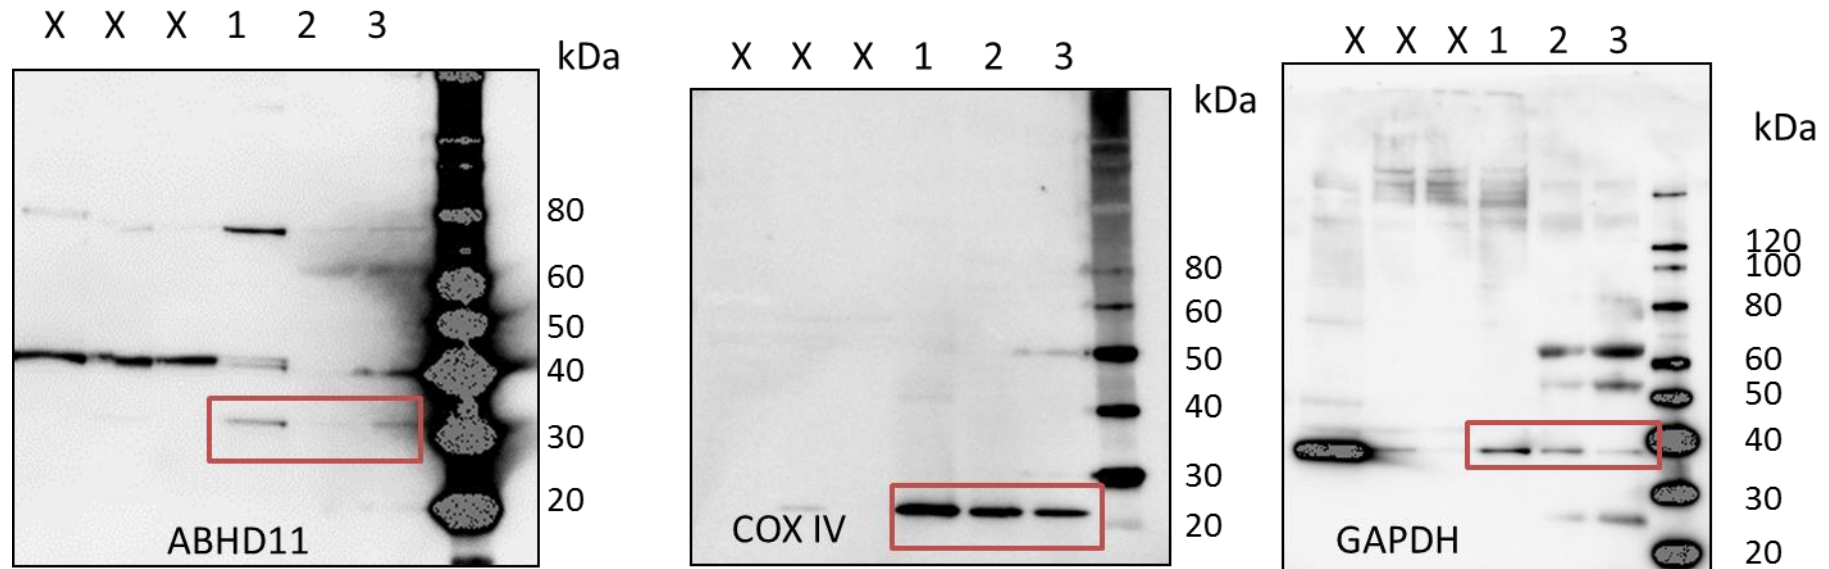

Raw images figure S4-B: Blot scan performed with imager LAS3000, FujiFilm. ECL

Figure S5E

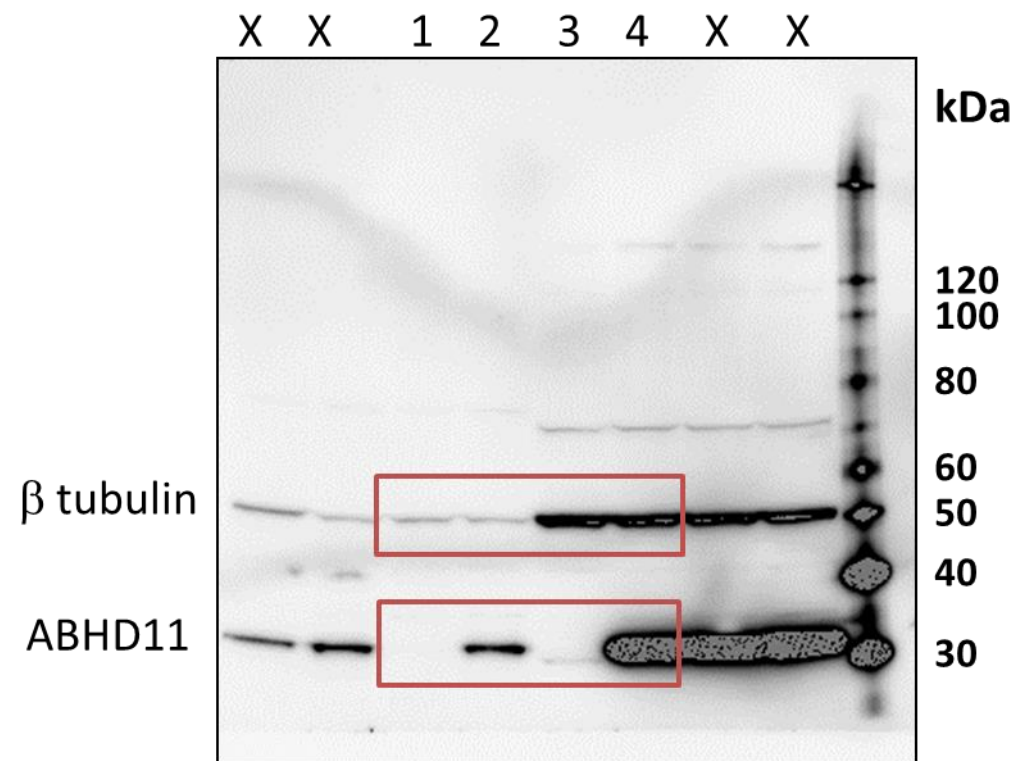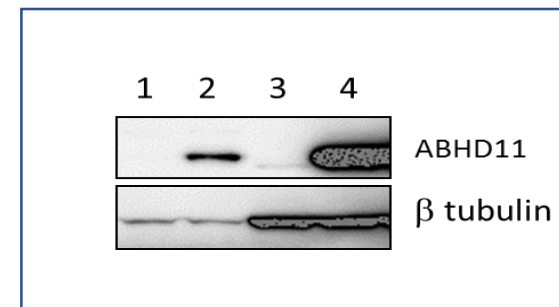

Raw image figure S5-E: Blot scan performed with imager LAS3000, FujiFilm. ECL

Figure S13 A: ileum lysates

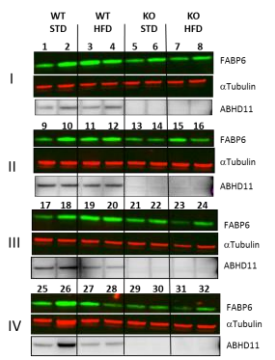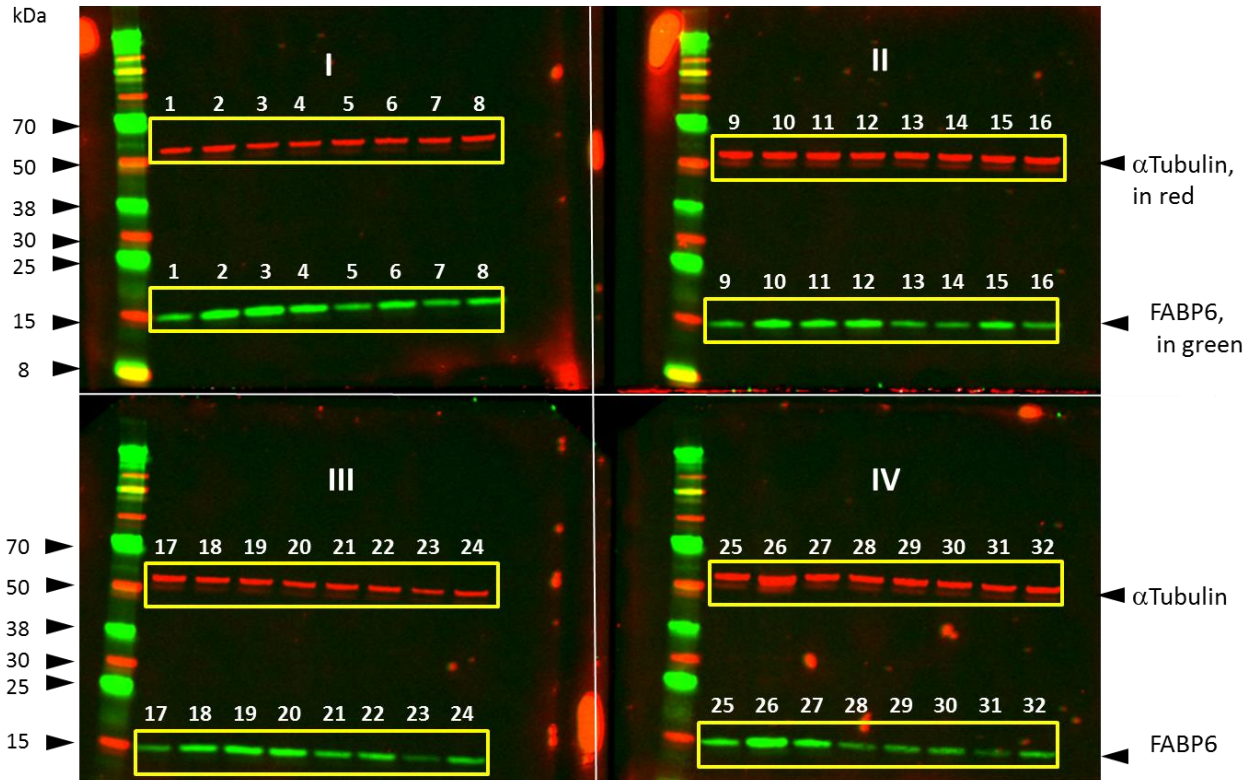

Raw images of the 4 membranes I, II, III and IV in fluorescence (IR) for αTubulin (Red) and FABP6 (green) protein expression. Marker: Chameleon Duo Pre-stained protein ladder (Li-Cor). Blot scan performed with Odyssey-FC, Li-Cor

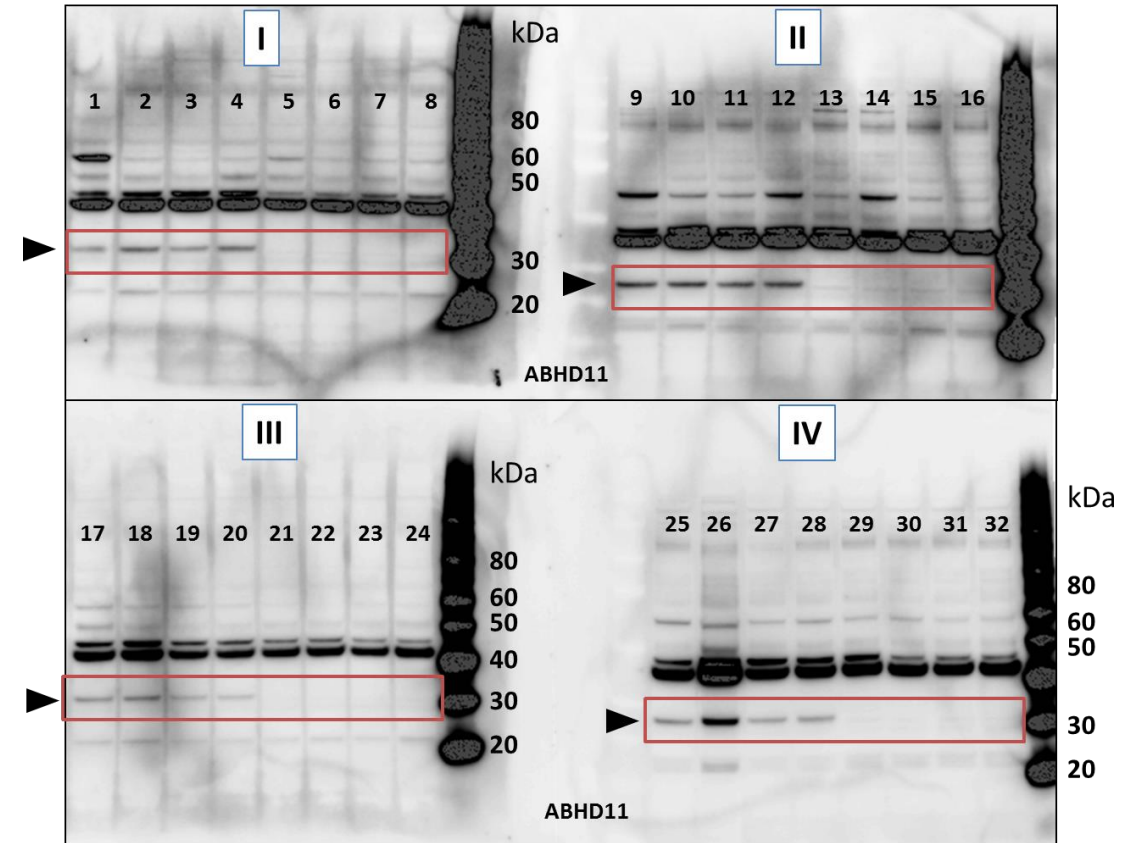

Raw images of the 4 membranes I, II, III and IV for ABHD11 protein expression. Marker Magic mark XP protein standard. Blot scan performed with LAS 3000, FujiFilm. ECL

Figure S14C: liver lysates

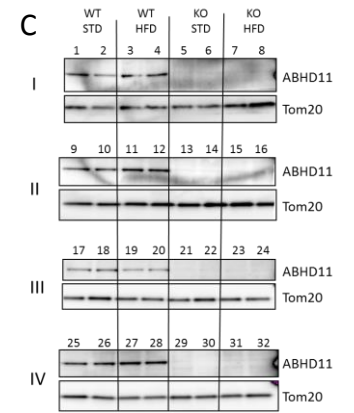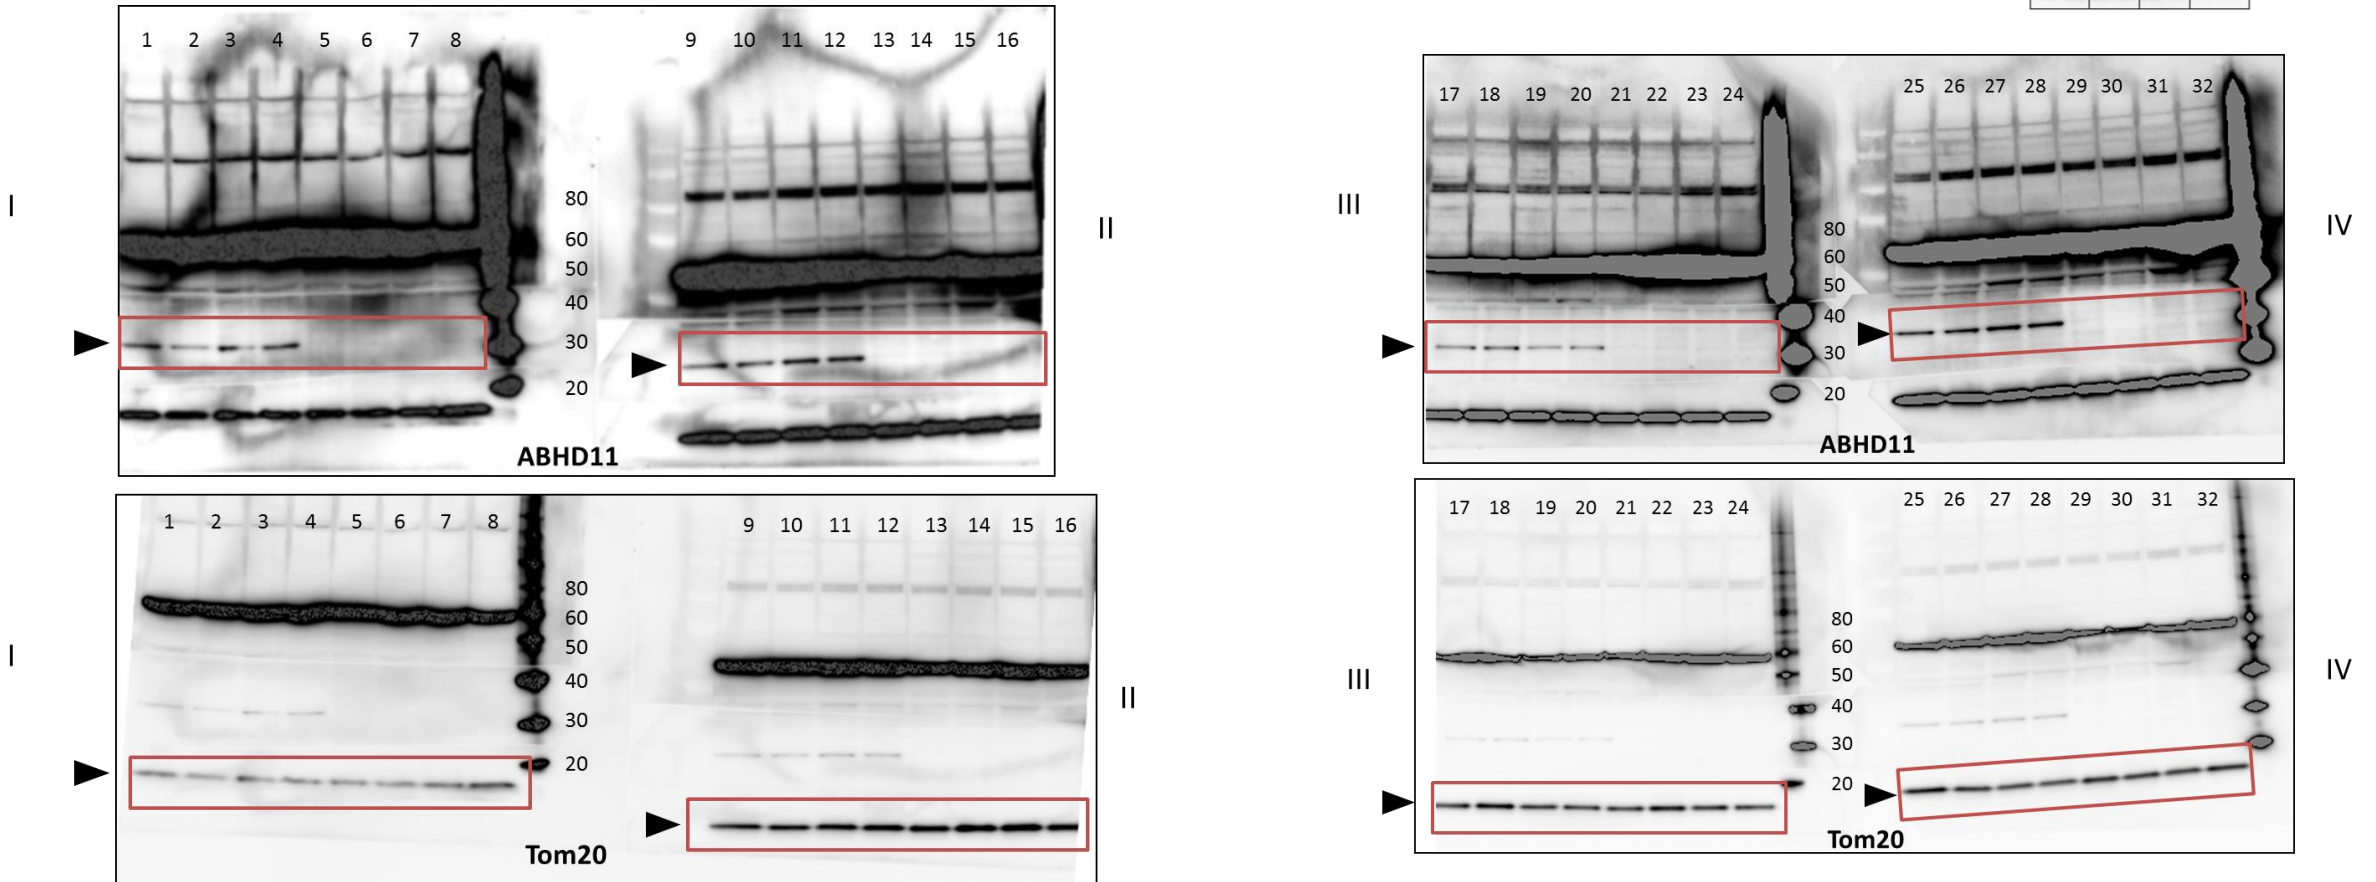

Raw images of the 4 membranes I, II, III and IV for ABHD11 and Tom20 protein expression. Marker Magic mark XP protein standard. Blot scan performed with LAS 3000, FujiFilm. ECL
