# Supplementary material for: ABHD11, a new diacylglycerol lipase involved in weight gain regulation
Source: PLoS One. 2020 Jun 24;15(6):e0234780. doi: 10.1371/journal.pone.0234780 (PMC7313976; doi:10.1371/journal.pone.0234780)
Supplement: S2 Appendix — (XLSX) [file pone.0234780.s002.xlsx]

## Sheet: Sup table S1
Supplementary table 1. ANOVA on transcriptomic analysis
		ANOVA	Number of probes/genes *
	1	KOSTD Vs WTSTD	18
	2	WTHFD Vs WTSTD	280
	3	KOHFD Vs KOSTD	0
		*Genes/probes with Folcd change of above +2 or bellow -2 with FDR 0.05
	1 KO_STD vs WT_STD.		2 WT_HFD vs WT_STD		3 KOHFD Vs KOSTD
Probe ID	1 FoldChange	1 FDR_BH	2 FoldChange	2 FDR_BH	3 FoldChange	3 FDR_BH	GeneSymbol	GeneName	Accessions	Description
A_51_P142187	-627.01	2.9183e-08	#N/A	#N/A	0	0	Abhd11	abhydrolase domain containing 11	ref|NM_145215|ref|NM_001190437|ref|NR_033794|ens|ENSMUST00000149778	Mus musculus abhydrolase domain containing 11 (Abhd11), transcript variant 1, mRNA [NM_145215]
A_52_P560620	-190.27	0.0002	#N/A	#N/A	0	0	Abhd11	abhydrolase domain containing 11	ref|NM_145215|ref|NM_001190437|ref|NR_033794|ens|ENSMUST00000148831	Mus musculus abhydrolase domain containing 11 (Abhd11), transcript variant 1, mRNA [NM_145215]
A_55_P2727286	-43.2116	1.1024e-05	#N/A	#N/A	0	0	Abhd11os	abhydrolase domain containing 11, opposite strand	ref|NR_026688|gb|AK008014|gb|BU554875|tc|TC1779858	Mus musculus abhydrolase domain containing 11, opposite strand (Abhd11os), long non-coding RNA [NR_026688]
A_52_P353541	-3.2724	0.0015	#N/A	#N/A	0	0	Fbxw13	F-box and WD-40 domain protein 13	ref|NM_177598|ens|ENSMUST00000199118|ens|ENSMUST00000061456|gb|BC119542	Mus musculus F-box and WD-40 domain protein 13 (Fbxw13), mRNA [NM_177598]
A_51_P178705	-2.8295	0.0455	-2.3899	0.0108	0	0	Olfr1093	olfactory receptor 1093	ref|NM_146366|ens|ENSMUST00000055273|ref|XM_011239562|ref|XM_011239563	Mus musculus olfactory receptor 1093 (Olfr1093), mRNA [NM_146366]
A_30_P01023241	-2.7492	0.0459	-2.3265	0.0118	0	0	0	0	chr19:4996544-4997119_R	lincRNA:chr19:4996544-4997119 reverse strand
A_55_P1978905	-2.4667	0.0459	#N/A	#N/A	0	0	0	0	ens|ENSMUST00000085379|nap|NAP019752-001	ribosomal protein L26, pseudogene 2 [Source:MGI Symbol;Acc:MGI:3648782] [ENSMUST00000085379]
A_66_P119614	-2.4434	0.0002	-2.0444	0.0004	0	0	Fam135b	family with sequence similarity 135, member B	ref|NM_177819|ens|ENSMUST00000022953|ref|XM_006521397|ref|XM_006521396	Mus musculus family with sequence similarity 135, member B (Fam135b), mRNA [NM_177819]
A_55_P2312144	-2.4035	0.0343	-2.0969	0.0075	0	0	B230398E01Rik	RIKEN cDNA B230398E01 gene	gb|AK046489|riken|B230398E01|nap|NAP118270-1	Mus musculus adult male corpora quadrigemina cDNA, RIKEN full-length enriched library, clone:B230398E01 product:unclassifiable, full insert sequence. [AK046489]
A_30_P01019649	-2.377	0.0045	-2.135	0.0009	0	0	0	0	chr5:14923900-15062725_F	lincRNA:chr5:14923900-15062725 forward strand
A_55_P2765280	-2.3194	0.0186	-2.9469	0.0004	0	0	Nmur1	neuromedin U receptor 1	ref|NM_010341|gb|AF044602|gb|CN693860|tc|TC1698243	Mus musculus neuromedin U receptor 1 (Nmur1), mRNA [NM_010341]
A_51_P202862	-2.2906	0.0072	#N/A	#N/A	0	0	Olfr398	olfactory receptor 398	ref|NM_146710|ens|ENSMUST00000117510|ens|ENSMUST00000053874|gb|BC148390	Mus musculus olfactory receptor 398 (Olfr398), mRNA [NM_146710]
A_52_P296311	-2.2568	0.0451	#N/A	#N/A	0	0	0	0	ens|ENSMUST00000119442|nap|NAP030005-1	predicted gene 13369 [Source:MGI Symbol;Acc:MGI:3651010] [ENSMUST00000119442]
A_52_P835520	-2.155	0.0186	#N/A	#N/A	0	0	0	0	gb|AK054225|tc|TC1624546|riken|E230034O05|nap|NAP088225-1	Mus musculus 2 days pregnant adult female oviduct cDNA, RIKEN full-length enriched library, clone:E230034O05 product:unclassifiable, full insert sequence. [AK054225]
A_55_P2183473	-2.102	0.0008	#N/A	#N/A	0	0	Cldn3	claudin 3	ref|NM_009902|ens|ENSMUST00000094245|gb|AK002672|gb|AK006514	Mus musculus claudin 3 (Cldn3), mRNA [NM_009902]
A_30_P01028995	-2.0688	0.0372	-2.2168	0.002	0	0	0	0	chr18:38776580-38841080_F	lincRNA:chr18:38776580-38841080 forward strand
A_51_P375146	3.2089	0.0371	5.3009	0.0005	0	0	Cd36	CD36 antigen	ref|NM_007643|ref|NM_001159558|ref|NM_001159555|ref|NM_001159557	Mus musculus CD36 antigen (Cd36), transcript variant 2, mRNA [NM_007643]
A_51_P182728	33.3901	1.1343e-08	#N/A	#N/A	0	0	Stx1a	syntaxin 1A (brain)	ref|NM_016801|ens|ENSMUST00000156626|ens|ENSMUST00000150838|ens|ENSMUST00000005509	Mus musculus syntaxin 1A (brain) (Stx1a), mRNA [NM_016801]
A_30_P01018271	#N/A	#N/A	-2.1999	0.0394	0	0	0	0	chr14:99735346-99735699_R	lincRNA:chr14:99735346-99735699 reverse strand
A_30_P01018914	#N/A	#N/A	15.9384	0.0026	0	0	0	0	chr9:78107225-78118850_F	lincRNA:chr9:78107225-78118850 forward strand
A_30_P01019157	#N/A	#N/A	-2.087	0.0318	0	0	0	0	chr16:22718344-22725594_F	lincRNA:chr16:22718344-22725594 forward strand
A_30_P01020769	#N/A	#N/A	4.6459	0.0027	0	0	0	0	chr19:5771425-5848475_F	lincRNA:chr19:5771425-5848475 forward strand
A_30_P01021821	#N/A	#N/A	-2.7084	0.0129	0	0	0	0	chr2:153325670-153352170_R	lincRNA:chr2:153325670-153352170 reverse strand
A_30_P01023287	#N/A	#N/A	2.136	0.0394	0	0	0	0	chr5:75186625-75186910_F	lincRNA:chr5:75186625-75186910 forward strand
A_30_P01023674	#N/A	#N/A	-2.0578	0.0285	0	0	0	0	chr2:173105462-173126187_R	lincRNA:chr2:173105462-173126187 reverse strand
A_30_P01023907	#N/A	#N/A	-2.0536	0.0191	0	0	0	0	chr10:57550245-57550421_F	lincRNA:chr10:57550245-57550421 forward strand
A_30_P01025386	#N/A	#N/A	-2.0303	0.002	0	0	0	0	chr15:101084597-101095097_R	lincRNA:chr15:101084597-101095097 reverse strand
A_30_P01026481	#N/A	#N/A	2.1196	0.0496	0	0	0	0	chr10:81816994-81863610_F	lincRNA:chr10:81816994-81863610 forward strand
A_30_P01029746	#N/A	#N/A	-2.1075	0.004	0	0	0	0	chr14:115443612-115445950_F	lincRNA:chr14:115443612-115445950 forward strand
A_30_P01030169	#N/A	#N/A	9.0211	0.0414	0	0	0	0	chr10:92547995-92556102_F	lincRNA:chr10:92547995-92556102 forward strand
A_30_P01030969	#N/A	#N/A	2.3889	0.0061	0	0	0	0	chr1:175660642-175671878_R	lincRNA:chr1:175660642-175671878 reverse strand
A_30_P01033618	#N/A	#N/A	-2.1461	0.0016	0	0	0	0	chr11:99970341-99973420_R	lincRNA:chr11:99970341-99973420 reverse strand
A_51_P101347	#N/A	#N/A	7.7251	0.0015	0	0	Pls1	plastin 1 (I-isoform)	ref|NM_001033210|ens|ENSMUST00000093800|ref|XM_006510746|ref|XM_006510748	Mus musculus plastin 1 (I-isoform) (Pls1), mRNA [NM_001033210]
A_51_P104718	#N/A	#N/A	9.8869	0.0108	0	0	Gpr12	G-protein coupled receptor 12	ref|NM_001010941|ref|NM_008151|ens|ENSMUST00000197431|ens|ENSMUST00000036211	Mus musculus G-protein coupled receptor 12 (Gpr12), transcript variant 1, mRNA [NM_001010941]
A_51_P106799	#N/A	#N/A	2.8106	0.0032	0	0	Pparg	peroxisome proliferator activated receptor gamma	ref|NM_011146|ref|NM_001127330|ens|ENSMUST00000171644|ens|ENSMUST00000000450	Mus musculus peroxisome proliferator activated receptor gamma (Pparg), transcript variant 2, mRNA [NM_011146]
A_51_P107362	#N/A	#N/A	-3.4705	0.0138	0	0	Socs2	suppressor of cytokine signaling 2	ref|NM_007706|ref|NM_001168655|ref|NM_001168656|ref|NM_001168657	Mus musculus suppressor of cytokine signaling 2 (Socs2), transcript variant 1, mRNA [NM_007706]
A_51_P114094	#N/A	#N/A	3.5788	0.0009	0	0	Clstn3	calsyntenin 3	ref|NM_153508|ens|ENSMUST00000008297|ens|ENSMUST00000112523|ref|XM_006506031	Mus musculus calsyntenin 3 (Clstn3), mRNA [NM_153508]
A_51_P123676	#N/A	#N/A	2.1028	0.0477	0	0	Synpo	synaptopodin	ref|NM_177340|ens|ENSMUST00000128528|ens|ENSMUST00000130044|ens|ENSMUST00000097566	Mus musculus synaptopodin (Synpo), transcript variant A, mRNA [NM_177340]
A_51_P131315	#N/A	#N/A	-5.7327	0.0111	0	0	Serpina9	serine (or cysteine) peptidase inhibitor, clade A (alpha-1 antiproteinase, antitrypsin), member 9	ref|NM_027997|ref|XM_006516241|ref|XM_006516242|ref|XM_006516243	Mus musculus serine (or cysteine) peptidase inhibitor, clade A (alpha-1 antiproteinase, antitrypsin), member 9 (Serpina9), mRNA [NM_027997]
A_51_P139678	#N/A	#N/A	5.017	0.001	0	0	Sprr1a	small proline-rich protein 1A	ref|NM_009264|ens|ENSMUST00000054599|gb|AK144782|gb|X91824	Mus musculus small proline-rich protein 1A (Sprr1a), mRNA [NM_009264]
A_51_P144531	#N/A	#N/A	2.0623	0.0201	0	0	Slc22a29	solute carrier family 22. member 29	ref|NM_172776|ens|ENSMUST00000140910|ens|ENSMUST00000142517|ens|ENSMUST00000113298	Mus musculus solute carrier family 22. member 29 (Slc22a29), mRNA [NM_172776]
A_51_P151214	#N/A	#N/A	-3.693	0.0231	0	0	C8b	complement component 8, beta polypeptide	ref|NM_133882|ens|ENSMUST00000123892|ens|ENSMUST00000031663|ref|XM_006502660	Mus musculus complement component 8, beta polypeptide (C8b), mRNA [NM_133882]
A_51_P152990	#N/A	#N/A	-2.0483	0.0255	0	0	Grem2	gremlin 2 homolog, cysteine knot superfamily (Xenopus laevis)	ref|NM_011825|ens|ENSMUST00000055294|ref|XM_011238807|ref|XM_006496826	Mus musculus gremlin 2 homolog, cysteine knot superfamily (Xenopus laevis) (Grem2), mRNA [NM_011825]
A_51_P154485	#N/A	#N/A	-3.6373	0.0414	0	0	Fcrla	Fc receptor-like A	ref|NM_145141|ref|NM_001160215|ref|NR_027666|ens|ENSMUST00000159171	Mus musculus Fc receptor-like A (Fcrla), transcript variant 2, mRNA [NM_145141]
A_51_P159565	#N/A	#N/A	2.1764	0.0206	0	0	Arhgef9	CDC42 guanine nucleotide exchange factor (GEF) 9	ref|NM_001033329|ref|NM_001290385|ref|NM_001290384|ens|ENSMUST00000199920	Mus musculus CDC42 guanine nucleotide exchange factor (GEF) 9 (Arhgef9), transcript variant 1, mRNA [NM_001033329]
A_51_P164630	#N/A	#N/A	7.7247	0.0017	0	0	Fitm1	fat storage-inducing transmembrane protein 1	ref|NM_026808|ens|ENSMUST00000022826|gb|AK003939|gb|AB054000	Mus musculus fat storage-inducing transmembrane protein 1 (Fitm1), mRNA [NM_026808]
A_51_P166886	#N/A	#N/A	3.6949	0.0132	0	0	Saa2	serum amyloid A 2	ref|NM_011314|ens|ENSMUST00000075982|ref|XM_011250829|ref|XM_011250828	Mus musculus serum amyloid A 2 (Saa2), mRNA [NM_011314]
A_51_P172663	#N/A	#N/A	4.6262	0.0467	0	0	Usp2	ubiquitin specific peptidase 2	ref|NM_198092|ref|NM_016808|ref|NM_198091|ens|ENSMUST00000176416	Mus musculus ubiquitin specific peptidase 2 (Usp2), transcript variant 3, mRNA [NM_198092]
A_51_P172853	#N/A	#N/A	2.1055	0.0138	0	0	Cd14	CD14 antigen	ref|NM_009841|ens|ENSMUST00000061829|gb|CT010355|gb|AK151139	Mus musculus CD14 antigen (Cd14), mRNA [NM_009841]
A_51_P188704	#N/A	#N/A	2.0424	0.0217	0	0	Unc13a	unc-13 homolog A (C. elegans)	ens|ENSMUST00000175780|ens|ENSMUST00000176777|gb|AK170263|gb|AK010728	unc-13 homolog A (C. elegans) [Source:MGI Symbol;Acc:MGI:3051532] [ENSMUST00000175780]
A_51_P188845	#N/A	#N/A	2.2699	0.0118	0	0	Adora1	adenosine A1 receptor	ref|NM_001008533|ref|NM_001282945|ref|NM_001039510|ref|NM_001291930	Mus musculus adenosine A1 receptor (Adora1), transcript variant 2, mRNA [NM_001008533]
A_51_P196113	#N/A	#N/A	-2.3043	0.0076	0	0	Mast1	microtubule associated serine/threonine kinase 1	ref|NM_019945|ens|ENSMUST00000153000|ens|ENSMUST00000109741|ref|XM_006531216	Mus musculus microtubule associated serine/threonine kinase 1 (Mast1), mRNA [NM_019945]
A_51_P201638	#N/A	#N/A	2.0026	0.0404	0	0	Unc119	unc-119 homolog (C. elegans)	ref|NM_011676|ens|ENSMUST00000149161|ens|ENSMUST00000125720|ens|ENSMUST00000002127	Mus musculus unc-119 homolog (C. elegans) (Unc119), mRNA [NM_011676]
A_51_P206235	#N/A	#N/A	4.7265	0.0056	0	0	Slc39a5	solute carrier family 39 (metal ion transporter), member 5	ref|NM_028051|ref|NM_001136237|ref|NM_028092|ens|ENSMUST00000167859	Mus musculus solute carrier family 39 (metal ion transporter), member 5 (Slc39a5), transcript variant 1, mRNA [NM_028051]
A_51_P207591	#N/A	#N/A	2.7718	0.0358	0	0	Anxa8	annexin A8	ref|NM_013473|ref|NM_001281845|ens|ENSMUST00000022519|gb|AK075870	Mus musculus annexin A8 (Anxa8), transcript variant 1, mRNA [NM_013473]
A_51_P209782	#N/A	#N/A	-2.3865	0.0093	0	0	Cyp2c44	cytochrome P450, family 2, subfamily c, polypeptide 44	ref|NM_001001446|ens|ENSMUST00000026211|gb|BC024068|gb|BC025819	Mus musculus cytochrome P450, family 2, subfamily c, polypeptide 44 (Cyp2c44), transcript variant 1, mRNA [NM_001001446]
A_51_P239750	#N/A	#N/A	-2.3416	0.0034	0	0	Inhba	inhibin beta-A	ref|NM_008380|ens|ENSMUST00000042603|ens|ENSMUST00000164993|ref|XM_011244285	Mus musculus inhibin beta-A (Inhba), mRNA [NM_008380]
A_51_P241995	#N/A	#N/A	2.302	0.0149	0	0	Col5a3	collagen, type V, alpha 3	ref|NM_016919|ens|ENSMUST00000004201|ref|XM_006510487|gb|AF176645	Mus musculus collagen, type V, alpha 3 (Col5a3), mRNA [NM_016919]
A_51_P243755	#N/A	#N/A	2.5254	0.0234	0	0	Slc10a2	solute carrier family 10, member 2	ref|NM_011388|ens|ENSMUST00000023835|gb|BC120703|gb|BC125290	Mus musculus solute carrier family 10, member 2 (Slc10a2), mRNA [NM_011388]
A_51_P257675	#N/A	#N/A	-2.3978	0.0314	0	0	Tspyl4	TSPY-like 4	ref|NM_030203|ens|ENSMUST00000047935|gb|AK028517|gb|AK034070	Mus musculus TSPY-like 4 (Tspyl4), mRNA [NM_030203]
A_51_P267653	#N/A	#N/A	2.0602	0.0049	0	0	Olfm3	olfactomedin 3	ref|NM_153157|ref|NM_153458|ref|NM_001286750|ens|ENSMUST00000051309	Mus musculus olfactomedin 3 (Olfm3), transcript variant 2, mRNA [NM_153157]
A_51_P269404	#N/A	#N/A	-7.9838	0.0389	0	0	Fmo3	flavin containing monooxygenase 3	ref|NM_008030|ens|ENSMUST00000028010|gb|AK149440|gb|U87147	Mus musculus flavin containing monooxygenase 3 (Fmo3), mRNA [NM_008030]
A_51_P269792	#N/A	#N/A	4.7329	0.005	0	0	Rad51b	RAD51 homolog B	ref|NM_009014|ref|XM_006515622|ref|XM_006515623|ref|XM_006515624	Mus musculus RAD51 homolog B (Rad51b), transcript variant 1, mRNA [NM_009014]
A_51_P276943	#N/A	#N/A	7.7112	0.0005	0	0	Gpc1	glypican 1	ref|NM_016696|ens|ENSMUST00000045970|ref|XM_006529142|ref|XM_011247925	Mus musculus glypican 1 (Gpc1), mRNA [NM_016696]
A_51_P279437	#N/A	#N/A	3.1561	0.013	0	0	Mfsd2a	major facilitator superfamily domain containing 2A	ref|NM_029662|ens|ENSMUST00000030408|ens|ENSMUST00000152308|ref|XM_006503477	Mus musculus major facilitator superfamily domain containing 2A (Mfsd2a), mRNA [NM_029662]
A_51_P287198	#N/A	#N/A	4.7504	0.018	0	0	Krt23	keratin 23	ref|NM_033373|ens|ENSMUST00000006969|gb|AK036901|gb|AK145247	Mus musculus keratin 23 (Krt23), mRNA [NM_033373]
A_51_P299527	#N/A	#N/A	-3.1638	0.0153	0	0	Slc22a26	solute carrier family 22 (organic cation transporter), member 26	gb|AJ132857|ens|ENSMUST00000120522|tc|TC1588658|nap|NAP103451-1	Mus musculus mRNA for putative integral membrane transport protein. [AJ132857]
A_51_P303791	#N/A	#N/A	-2.3817	0.0227	0	0	9530076L18	uncharacterized protein 9530076L18	gb|AK035610|riken|9530076L18|nap|NAP078840-1	Mus musculus adult male urinary bladder cDNA, RIKEN full-length enriched library, clone:9530076L18 product:unclassifiable, full insert sequence. [AK035610]
A_51_P308029	#N/A	#N/A	2.4338	0.0033	0	0	2010107G23Rik	RIKEN cDNA 2010107G23 gene	ref|NM_027251|ens|ENSMUST00000064050|ens|ENSMUST00000124615|ens|ENSMUST00000142821	Mus musculus RIKEN cDNA 2010107G23 gene (2010107G23Rik), mRNA [NM_027251]
A_51_P313581	#N/A	#N/A	2.854	0.0018	0	0	Fabp2	fatty acid binding protein 2, intestinal	ref|NM_007980|ens|ENSMUST00000023820|gb|AK007995|gb|M65034	Mus musculus fatty acid binding protein 2, intestinal (Fabp2), mRNA [NM_007980]
A_51_P334942	#N/A	#N/A	2.5371	0.0015	0	0	Aldh1a1	aldehyde dehydrogenase family 1, subfamily A1	ref|NM_013467|ens|ENSMUST00000087638|gb|M74570|gb|BC044729	Mus musculus aldehyde dehydrogenase family 1, subfamily A1 (Aldh1a1), mRNA [NM_013467]
A_51_P334979	#N/A	#N/A	2.2269	0.0009	0	0	Apoc2	apolipoprotein C-II	ref|NM_001277944|ens|ENSMUST00000142352|ens|ENSMUST00000150569|ens|ENSMUST00000134116	Mus musculus apolipoprotein C-II (Apoc2), mRNA [NM_001277944]
A_51_P335480	#N/A	#N/A	2.5915	0.0288	0	0	1810055G02Rik	RIKEN cDNA 1810055G02 gene	ref|NM_028077|ens|ENSMUST00000039048|ref|XM_006531841|ref|XM_006531840	Mus musculus RIKEN cDNA 1810055G02 gene (1810055G02Rik), mRNA [NM_028077]
A_51_P338413	#N/A	#N/A	2.015	0.0059	0	0	Stap1	signal transducing adaptor family member 1	ref|NM_019992|ref|XM_006535159|ref|XM_006535160|gb|AB036058	Mus musculus signal transducing adaptor family member 1 (Stap1), mRNA [NM_019992]
A_51_P342126	#N/A	#N/A	8.2432	0.0277	0	0	Ttc39a	tetratricopeptide repeat domain 39A	ref|NM_153392|ref|NM_001145948|ens|ENSMUST00000064129|ref|XM_006502998	Mus musculus tetratricopeptide repeat domain 39A (Ttc39a), transcript variant 2, mRNA [NM_153392]
A_51_P343517	#N/A	#N/A	9.3112	0.0068	0	0	Ly6d	lymphocyte antigen 6 complex, locus D	ref|NM_010742|ens|ENSMUST00000040404|gb|X63782|gb|BC025135	Mus musculus lymphocyte antigen 6 complex, locus D (Ly6d), mRNA [NM_010742]
A_51_P346668	#N/A	#N/A	-2.124	0.0243	0	0	Irf5	interferon regulatory factor 5	ref|NM_012057|ref|NM_001252382|ens|ENSMUST00000163511|ens|ENSMUST00000004392	Mus musculus interferon regulatory factor 5 (Irf5), transcript variant 2, mRNA [NM_012057]
A_51_P346893	#N/A	#N/A	3.1165	0.0017	0	0	Extl1	exostoses (multiple)-like 1	ref|NM_019578|ens|ENSMUST00000030643|ref|XM_011250306|ref|XM_006539058	Mus musculus exostoses (multiple)-like 1 (Extl1), mRNA [NM_019578]
A_51_P349888	#N/A	#N/A	-2.3533	0.0079	0	0	Ang2	angiogenin, ribonuclease A family, member 2	ref|NM_007449|ens|ENSMUST00000051274|gb|BC140357|gb|BC146501	Mus musculus angiogenin, ribonuclease A family, member 2 (Ang2), mRNA [NM_007449]
A_51_P358445	#N/A	#N/A	13.1617	0.0079	0	0	Dnase1	deoxyribonuclease I	ref|NM_010061|ens|ENSMUST00000144792|ens|ENSMUST00000006136|ens|ENSMUST00000125961	Mus musculus deoxyribonuclease I (Dnase1), mRNA [NM_010061]
A_51_P362066	#N/A	#N/A	11.564	0.0327	0	0	Chil1	chitinase-like 1	ref|NM_007695|ens|ENSMUST00000134812|ens|ENSMUST00000082060|ens|ENSMUST00000153856	Mus musculus chitinase-like 1 (Chil1), mRNA [NM_007695]
A_51_P372550	#N/A	#N/A	4.8976	0.0183	0	0	Cgref1	cell growth regulator with EF hand domain 1	ref|NM_026770|ref|NM_001160149|ens|ENSMUST00000031051|gb|BC023116	Mus musculus cell growth regulator with EF hand domain 1 (Cgref1), transcript variant 1, mRNA [NM_026770]
A_51_P378622	#N/A	#N/A	2.2368	0.002	0	0	Them7	thioesterase superfamily member 7	ref|NM_028747|ref|NM_001159638|ens|ENSMUST00000068813|gb|AK002603	Mus musculus thioesterase superfamily member 7 (Them7), transcript variant 1, mRNA [NM_028747]
A_51_P379385	#N/A	#N/A	-2.233	0.0045	0	0	Abca8a	ATP-binding cassette, sub-family A (ABC1), member 8a	ref|NM_153145|ens|ENSMUST00000106664|ens|ENSMUST00000046223|ens|ENSMUST00000100287	Mus musculus ATP-binding cassette, sub-family A (ABC1), member 8a (Abca8a), mRNA [NM_153145]
A_51_P383399	#N/A	#N/A	2.0534	0.0077	0	0	Aldh1a7	aldehyde dehydrogenase family 1, subfamily A7	ref|NM_011921|ens|ENSMUST00000025656|gb|U96401|gb|BC032880	Mus musculus aldehyde dehydrogenase family 1, subfamily A7 (Aldh1a7), mRNA [NM_011921]
A_51_P384436	#N/A	#N/A	-2.5647	0.0159	0	0	Ctrc	chymotrypsin C (caldecrin)	ref|NM_001033875|ens|ENSMUST00000037059|ens|ENSMUST00000153282|ens|ENSMUST00000105781	Mus musculus chymotrypsin C (caldecrin) (Ctrc), mRNA [NM_001033875]
A_51_P385114	#N/A	#N/A	8.9499	0.0072	0	0	Snhg11	small nucleolar RNA host gene 11	ref|NM_175692|ens|ENSMUST00000138307|ens|ENSMUST00000149303|gb|AK080745	Mus musculus small nucleolar RNA host gene 11 (Snhg11), mRNA [NM_175692]
A_51_P386648	#N/A	#N/A	8.6285	0.0005	0	0	Glod5	glyoxalase domain containing 5	ref|NM_027227|ens|ENSMUST00000033503|ref|XM_006527699|gb|AK008008	Mus musculus glyoxalase domain containing 5 (Glod5), mRNA [NM_027227]
A_51_P391432	#N/A	#N/A	3.0306	0.0069	0	0	Ifi27l2b	interferon, alpha-inducible protein 27 like 2B	ref|NM_145449|ens|ENSMUST00000044687|ref|XM_006515758|gb|AK007590	Mus musculus interferon, alpha-inducible protein 27 like 2B (Ifi27l2b), mRNA [NM_145449]
A_51_P395856	#N/A	#N/A	-2.0915	0.0361	0	0	Slc22a7	solute carrier family 22 (organic anion transporter), member 7	ref|NM_144856|ens|ENSMUST00000087012|gb|BC024119|gb|AK082865	Mus musculus solute carrier family 22 (organic anion transporter), member 7 (Slc22a7), mRNA [NM_144856]
A_51_P397934	#N/A	#N/A	5.6035	0.0007	0	0	Grin3b	glutamate receptor, ionotropic, NMDA3B	ref|NM_130455|ens|ENSMUST00000045085|ref|XM_006513287|gb|AY062435	Mus musculus glutamate receptor, ionotropic, NMDA3B (Grin3b), mRNA [NM_130455]
A_51_P408172	#N/A	#N/A	4.9552	0.0118	0	0	Col6a4	collagen, type VI, alpha 4	ref|NM_026763|ens|ENSMUST00000121963|ens|ENSMUST00000149207|gb|AK003211	Mus musculus collagen, type VI, alpha 4 (Col6a4), mRNA [NM_026763]
A_51_P408631	#N/A	#N/A	2.0178	0.0051	0	0	Slc20a1	solute carrier family 20, member 1	ref|NM_015747|ens|ENSMUST00000110315|ens|ENSMUST00000028880|ref|XM_011239399	Mus musculus solute carrier family 20, member 1 (Slc20a1), transcript variant 1, mRNA [NM_015747]
A_51_P424532	#N/A	#N/A	2.7397	0.0392	0	0	Vnn1	vanin 1	ref|NM_011704|ens|ENSMUST00000041416|ref|XM_006512718|gb|BC019203	Mus musculus vanin 1 (Vnn1), mRNA [NM_011704]
A_51_P426513	#N/A	#N/A	-4.6136	0.0189	0	0	Sult3a1	sulfotransferase family 3A, member 1	gb|AF026075|tc|TC1595481|nap|NAP026174-1|nap|NAP057602-1	Mus musculus sulfotransferase-related protein (SULT-X2) mRNA, complete cds. [AF026075]
A_51_P427232	#N/A	#N/A	2.3018	0.0262	0	0	Zbed5	zinc finger, BED type containing 5	ref|NM_183088|gb|BC137610|gb|AK010551|gb|BC054117	Mus musculus zinc finger, BED-type containing 5 (Zbed5), mRNA [NM_183088]
A_51_P428977	#N/A	#N/A	-2.4787	0.0149	0	0	Gm16551	predicted gene 16551	ref|NR_045284|gb|AK051235|gb|BC023444|tc|TC1607570	Mus musculus predicted gene 16551 (Gm16551), transcript variant 1, long non-coding RNA [NR_045284]
A_51_P443344	#N/A	#N/A	2.1559	0.0027	0	0	Acyp2	acylphosphatase 2, muscle type	ref|NM_029344|ens|ENSMUST00000074613|gb|AK046238|gb|AK009134	Mus musculus acylphosphatase 2, muscle type (Acyp2), mRNA [NM_029344]
A_51_P450278	#N/A	#N/A	3.431	0.0221	0	0	2010003K11Rik	RIKEN cDNA 2010003K11 gene	ref|NM_027237|ens|ENSMUST00000048482|gb|AK008072|gb|BC021951	Mus musculus RIKEN cDNA 2010003K11 gene (2010003K11Rik), mRNA [NM_027237]
A_51_P452768	#N/A	#N/A	-2.1256	0.0102	0	0	Cyp4f14	cytochrome P450, family 4, subfamily f, polypeptide 14	ref|NM_022434|ref|NM_001204336|ref|NM_001204335|ref|NM_001204333	Mus musculus cytochrome P450, family 4, subfamily f, polypeptide 14 (Cyp4f14), transcript variant 1, mRNA [NM_022434]
A_51_P459108	#N/A	#N/A	2.4055	0.0009	0	0	Insl6	insulin-like 6	ref|NM_013754|ens|ENSMUST00000052380|gb|AF143807|gb|AK005622	Mus musculus insulin-like 6 (Insl6), mRNA [NM_013754]
A_51_P461123	#N/A	#N/A	2.0978	0.0196	0	0	Tlr5	toll-like receptor 5	gb|AF186107|tc|TC1589961|nap|NAP057562-1	Mus musculus toll-like receptor 5 (Tlr5) mRNA, complete cds. [AF186107]
A_51_P465211	#N/A	#N/A	6.444	0.0007	0	0	Wfdc2	WAP four-disulfide core domain 2	ref|NM_026323|ens|ENSMUST00000017867|ref|XM_006500087|gb|AK003771	Mus musculus WAP four-disulfide core domain 2 (Wfdc2), mRNA [NM_026323]
A_51_P465281	#N/A	#N/A	4.3282	0.0009	0	0	Lgals1	lectin, galactose binding, soluble 1	ref|NM_008495|ens|ENSMUST00000089377|gb|BC002063|gb|X66532	Mus musculus lectin, galactose binding, soluble 1 (Lgals1), mRNA [NM_008495]
A_51_P490456	#N/A	#N/A	10.2767	0.027	0	0	Cidec	cell death-inducing DFFA-like effector c	ref|NM_178373|ref|NM_001301295|ens|ENSMUST00000032416|ens|ENSMUST00000113089	Mus musculus cell death-inducing DFFA-like effector c (Cidec), transcript variant 1, mRNA [NM_178373]
A_51_P495780	#N/A	#N/A	5.4232	0.0393	0	0	Plin4	perilipin 4	ref|NM_020568|ens|ENSMUST00000190703|ens|ENSMUST00000002908|ref|XM_011246546	Mus musculus perilipin 4 (Plin4), mRNA [NM_020568]
A_51_P497090	#N/A	#N/A	-5.233	0.0052	0	0	Enho	energy homeostasis associated	ref|NM_027147|ens|ENSMUST00000127306|gb|BC021944|gb|AK216096	Mus musculus energy homeostasis associated (Enho), mRNA [NM_027147]
A_51_P502906	#N/A	#N/A	-2.0548	0.0186	0	0	0	0	ens|ENSMUST00000162314|gb|BC132444|gb|BC132448|gb|BC042938	angiogenin, ribonuclease A family, pseudogene 1 [Source:MGI Symbol;Acc:MGI:104986] [ENSMUST00000162314]
A_51_P509669	#N/A	#N/A	2.4018	0.0201	0	0	Uap1l1	UDP-N-acteylglucosamine pyrophosphorylase 1-like 1	ref|NM_001033293|ens|ENSMUST00000131025|ens|ENSMUST00000151131|ens|ENSMUST00000138985	Mus musculus UDP-N-acteylglucosamine pyrophosphorylase 1-like 1 (Uap1l1), mRNA [NM_001033293]
A_52_P1005000	#N/A	#N/A	4.619	0.0209	0	0	0610009O20Rik	RIKEN cDNA 0610009O20 gene	gb|AK141675|gb|BB439875|riken|D030019G05	Mus musculus 9 days embryo whole body cDNA, RIKEN full-length enriched library, clone:D030019G05 product:hypothetical Sel1-like repeat/TPR repeat/Tetraspanin containing protein, full insert sequence. [AK141675]
A_52_P106259	#N/A	#N/A	-4.5121	0.0012	0	0	Egfr	epidermal growth factor receptor	ref|NM_207655|gb|AK163338|gb|AF275367|tc|TC1578749	Mus musculus epidermal growth factor receptor (Egfr), transcript variant 1, mRNA [NM_207655]
A_52_P107769	#N/A	#N/A	-2.6427	0.0325	0	0	LOC105244251	uncharacterized LOC105244251	ref|XR_866592|gb|AK033113|gb|AK088394|tc|TC1597460	PREDICTED: Mus musculus uncharacterized LOC105244251 (LOC105244251), transcript variant X2, ncRNA [XR_866592]
A_52_P155990	#N/A	#N/A	2.2803	0.0192	0	0	Acaa1a	acetyl-Coenzyme A acyltransferase 1A	ref|NM_130864|ens|ENSMUST00000177463|ens|ENSMUST00000176007|ens|ENSMUST00000176546	Mus musculus acetyl-Coenzyme A acyltransferase 1A (Acaa1a), mRNA [NM_130864]
A_52_P251623	#N/A	#N/A	-4.4036	0.0418	0	0	Fam222a	family with sequence similarity 222, member A	ref|NM_001004180|ref|XM_006530401|gb|BC057022|tc|TC1588694	Mus musculus family with sequence similarity 222, member A (Fam222a), mRNA [NM_001004180]
A_52_P296913	#N/A	#N/A	2.2279	0.0156	0	0	Cnnm1	cyclin M1	ref|NM_031396|ens|ENSMUST00000165311|ref|XM_006527480|ref|XM_006527481	Mus musculus cyclin M1 (Cnnm1), mRNA [NM_031396]
A_52_P30451	#N/A	#N/A	-2.4987	0.0079	0	0	Ppp1r3c	protein phosphatase 1, regulatory (inhibitor) subunit 3C	ref|NM_016854|ens|ENSMUST00000087321|gb|AK078735|gb|AK078506	Mus musculus protein phosphatase 1, regulatory (inhibitor) subunit 3C (Ppp1r3c), mRNA [NM_016854]
A_52_P306357	#N/A	#N/A	-4.2828	0.0151	0	0	Prok1	prokineticin 1	ens|ENSMUST00000198732|gb|BC042707|gb|AK044344|tc|TC1605109	prokineticin 1 [Source:MGI Symbol;Acc:MGI:2180370] [ENSMUST00000198732]
A_52_P318673	#N/A	#N/A	3.1142	0.0173	0	0	Saa1	serum amyloid A 1	ref|NM_009117|ens|ENSMUST00000128088|ref|XM_006540724|ref|XM_006540725	Mus musculus serum amyloid A 1 (Saa1), mRNA [NM_009117]
A_52_P334796	#N/A	#N/A	-2.0368	0.0281	0	0	Taar4	trace amine-associated receptor 4	ref|NM_001008499|ens|ENSMUST00000092660|gb|AY255547|gb|BC117729	Mus musculus trace amine-associated receptor 4 (Taar4), mRNA [NM_001008499]
A_52_P338066	#N/A	#N/A	6.2289	0.0202	0	0	Ubd	ubiquitin D	ref|NM_023137|ens|ENSMUST00000038844|gb|AK008116|gb|BC027627	Mus musculus ubiquitin D (Ubd), mRNA [NM_023137]
A_52_P408025	#N/A	#N/A	2.8392	0.0179	0	0	Mpped2	metallophosphoesterase domain containing 2	ref|NM_001143683|ref|NM_029837|ens|ENSMUST00000016530|ens|ENSMUST00000111063	Mus musculus metallophosphoesterase domain containing 2 (Mpped2), transcript variant 1, mRNA [NM_001143683]
A_52_P414464	#N/A	#N/A	2.2061	0.0134	0	0	Rcan2	regulator of calcineurin 2	ref|NM_207649|ref|NM_001286653|ref|NM_001286654|ref|NM_030598	Mus musculus regulator of calcineurin 2 (Rcan2), transcript variant 1, mRNA [NM_207649]
A_52_P423174	#N/A	#N/A	2.5593	0.0114	0	0	Acaa1b	acetyl-Coenzyme A acyltransferase 1B	ref|NM_146230|ens|ENSMUST00000010795|ref|XM_011242970|ref|XM_006512114	Mus musculus acetyl-Coenzyme A acyltransferase 1B (Acaa1b), mRNA [NM_146230]
A_52_P445360	#N/A	#N/A	10.6467	0.0182	0	0	Krt20	keratin 20	ref|NM_023256|ens|ENSMUST00000017743|gb|AK008079|gb|AK018567	Mus musculus keratin 20 (Krt20), mRNA [NM_023256]
A_52_P456750	#N/A	#N/A	-2.0957	0.0111	0	0	Aph1b	anterior pharynx defective 1b homolog (C. elegans)	ref|NM_177583|ens|ENSMUST00000168309|ens|ENSMUST00000034934|ref|XM_006510922	Mus musculus anterior pharynx defective 1b homolog (C. elegans) (Aph1b), mRNA [NM_177583]
A_52_P478025	#N/A	#N/A	10.8719	0.0014	0	0	Smpd3	sphingomyelin phosphodiesterase 3, neutral	ref|NM_021491|ens|ENSMUST00000067512|ref|XM_006531239|ref|XM_011248464	Mus musculus sphingomyelin phosphodiesterase 3, neutral (Smpd3), mRNA [NM_021491]
A_52_P537545	#N/A	#N/A	11.8265	0.0027	0	0	Smpd3	sphingomyelin phosphodiesterase 3, neutral	ref|NM_021491|ens|ENSMUST00000067512|ref|XM_006531239|ref|XM_011248464	Mus musculus sphingomyelin phosphodiesterase 3, neutral (Smpd3), mRNA [NM_021491]
A_52_P56471	#N/A	#N/A	-3.6855	0.0029	0	0	Egfr	epidermal growth factor receptor	ref|NM_007912|ens|ENSMUST00000125984|ens|ENSMUST00000102884|gb|AF277898	Mus musculus epidermal growth factor receptor (Egfr), transcript variant 2, mRNA [NM_007912]
A_52_P566840	#N/A	#N/A	-15.1222	0.0005	0	0	Adgrf1	adhesion G protein-coupled receptor F1	ref|NM_133776|ens|ENSMUST00000047399|gb|AK052799|gb|BC019217	Mus musculus adhesion G protein-coupled receptor F1 (Adgrf1), mRNA [NM_133776]
A_52_P585907	#N/A	#N/A	32.414	0.0062	0	0	Pla2g4f	phospholipase A2, group IVF	ref|NM_001024145|ens|ENSMUST00000054651|ens|ENSMUST00000142183|ref|XM_006499650	Mus musculus phospholipase A2, group IVF (Pla2g4f), mRNA [NM_001024145]
A_52_P590740	#N/A	#N/A	2.3853	0.0065	0	0	Tle3	transducin-like enhancer of split 3, homolog of Drosophila E(spl)	ref|NM_001083927|ref|NM_009389|ref|NM_001083928|ens|ENSMUST00000159140	Mus musculus transducin-like enhancer of split 3, homolog of Drosophila E(spl) (Tle3), transcript variant 1, mRNA [NM_001083927]
A_52_P603038	#N/A	#N/A	3.0708	0.0084	0	0	Olig1	oligodendrocyte transcription factor 1	ref|NM_016968|ens|ENSMUST00000056882|gb|AK144435|gb|AK158791	Mus musculus oligodendrocyte transcription factor 1 (Olig1), mRNA [NM_016968]
A_52_P627269	#N/A	#N/A	3.4122	0.0079	0	0	Ces2b	carboxyesterase 2B	ref|NM_198171|ens|ENSMUST00000163042|gb|BC015286|gb|BC058815	Mus musculus carboxyesterase 2B (Ces2b), mRNA [NM_198171]
A_52_P630867	#N/A	#N/A	2.0434	0.0103	0	0	Abcc4	ATP-binding cassette, sub-family C (CFTR/MRP), member 4	ref|NM_001033336|ref|NM_001163675|ref|NM_001163676|ens|ENSMUST00000036554	Mus musculus ATP-binding cassette, sub-family C (CFTR/MRP), member 4 (Abcc4), transcript variant 1, mRNA [NM_001033336]
A_52_P64376	#N/A	#N/A	7.6428	0.0005	0	0	Mogat1	monoacylglycerol O-acyltransferase 1	ref|NM_026713|ens|ENSMUST00000113524|ens|ENSMUST00000012331|ens|ENSMUST00000125458	Mus musculus monoacylglycerol O-acyltransferase 1 (Mogat1), mRNA [NM_026713]
A_52_P655803	#N/A	#N/A	2.0786	0.0126	0	0	Chpt1	choline phosphotransferase 1	ref|NM_144807|ref|NM_001146690|ref|NR_027477|ens|ENSMUST00000073783	Mus musculus choline phosphotransferase 1 (Chpt1), transcript variant 2, mRNA [NM_144807]
A_52_P674338	#N/A	#N/A	-4.6249	0.0036	0	0	Egfr	epidermal growth factor receptor	ref|NM_207655|gb|X78987|gb|AK087861|gb|AK163338	Mus musculus epidermal growth factor receptor (Egfr), transcript variant 1, mRNA [NM_207655]
A_52_P707394	#N/A	#N/A	-2.419	0.048	0	0	0	0	gb|AK054314|gb|AK149571|tc|TC1592906|riken|E330014H18	Mus musculus 2 days pregnant adult female ovary cDNA, RIKEN full-length enriched library, clone:E330014H18 product:hypothetical Cysteine-rich region profile/Histidine-rich region profile containing protein, full insert sequence. [AK054314]
A_52_P739414	#N/A	#N/A	-2.097	0.0052	0	0	0	0	gb|AK048514|gb|BI665270|tc|TC1603204|riken|C130068G09	Mus musculus 16 days embryo head cDNA, RIKEN full-length enriched library, clone:C130068G09 product:unclassifiable, full insert sequence. [AK048514]
A_52_P771436	#N/A	#N/A	-2.3603	0.0058	0	0	0	0	gb|AK052900|gb|BB518485|tc|TC1616326|riken|D830029N11	Mus musculus 16 days neonate heart cDNA, RIKEN full-length enriched library, clone:D830029N11 product:unclassifiable, full insert sequence. [AK052900]
A_52_P78770	#N/A	#N/A	2.1187	0.0263	0	0	Chpt1	choline phosphotransferase 1	ref|NM_144807|gb|AY445814|gb|AK080245|tc|TC1577305	Mus musculus choline phosphotransferase 1 (Chpt1), transcript variant 2, mRNA [NM_144807]
A_55_P1954116	#N/A	#N/A	-3.2351	0.0117	0	0	C8b	complement component 8, beta polypeptide	ref|NM_133882|ens|ENSMUST00000031663|ref|XM_006502660|gb|AK050313	Mus musculus complement component 8, beta polypeptide (C8b), mRNA [NM_133882]
A_55_P1954448	#N/A	#N/A	3.9158	0.0049	0	0	Myh14	myosin, heavy polypeptide 14	ref|NM_001271540|ref|NM_028021|ref|NM_001271538|ens|ENSMUST00000107900	Mus musculus myosin, heavy polypeptide 14 (Myh14), transcript variant 2, mRNA [NM_001271540]
A_55_P1958532	#N/A	#N/A	2.4052	0.0315	0	0	Hr	hairless	ref|NM_021877|ens|ENSMUST00000022691|ref|XM_011244966|gb|AK076280	Mus musculus hairless (Hr), mRNA [NM_021877]
A_55_P1958921	#N/A	#N/A	-2.1024	0.011	0	0	Ankrd29	ankyrin repeat domain 29	ref|NM_001190371|ens|ENSMUST00000137948|gb|AK162301|ens|ENSMUST00000118525	Mus musculus ankyrin repeat domain 29 (Ankrd29), mRNA [NM_001190371]
A_55_P1960828	#N/A	#N/A	2.389	0.0199	0	0	Slc16a13	solute carrier family 16 (monocarboxylic acid transporters), member 13	ref|NM_172371|ens|ENSMUST00000060010|ref|XM_006534113|ref|XM_006537206	Mus musculus solute carrier family 16 (monocarboxylic acid transporters), member 13 (Slc16a13), mRNA [NM_172371]
A_55_P1961736	#N/A	#N/A	2.1475	0.0164	0	0	Rcan2	regulator of calcineurin 2	ref|NM_001286653|ref|NM_001286654|ref|NM_207649|ref|NM_030598	Mus musculus regulator of calcineurin 2 (Rcan2), transcript variant 3, mRNA [NM_001286653]
A_55_P1967325	#N/A	#N/A	3.3146	0.0324	0	0	Fam19a5	family with sequence similarity 19, member A5	ref|NM_001252310|ref|NM_134096|ref|NR_045510|ens|ENSMUST00000068088	Mus musculus family with sequence similarity 19, member A5 (Fam19a5), transcript variant 1, mRNA [NM_001252310]
A_55_P1979674	#N/A	#N/A	-2.0881	0.0048	0	0	Ikzf4	IKAROS family zinc finger 4	ref|NM_011772|ens|ENSMUST00000065334|gb|AK089522|gb|BY764586	Mus musculus IKAROS family zinc finger 4 (Ikzf4), mRNA [NM_011772]
A_55_P1985351	#N/A	#N/A	10.0792	0.0027	0	0	Slc35f2	solute carrier family 35, member F2	ref|NM_028060|ens|ENSMUST00000048670|ref|XM_006511461|ref|XM_006511460	Mus musculus solute carrier family 35, member F2 (Slc35f2), mRNA [NM_028060]
A_55_P1985433	#N/A	#N/A	3.155	0.0068	0	0	Nrg1	neuregulin 1	ref|NM_178591|ens|ENSMUST00000073884|gb|AY648975|gb|AY648976	Mus musculus neuregulin 1 (Nrg1), mRNA [NM_178591]
A_55_P1985835	#N/A	#N/A	2.981	0.0161	0	0	Dnase1	deoxyribonuclease I	ref|NM_010061|ens|ENSMUST00000120009|ens|ENSMUST00000006136|ens|ENSMUST00000125961	Mus musculus deoxyribonuclease I (Dnase1), mRNA [NM_010061]
A_55_P1989658	#N/A	#N/A	-43.573	0.0079	0	0	Slco1a1	solute carrier organic anion transporter family, member 1a1	ref|NM_013797|ens|ENSMUST00000042119|gb|AF223067|gb|AY195868	Mus musculus solute carrier organic anion transporter family, member 1a1 (Slco1a1), mRNA [NM_013797]
A_55_P1991416	#N/A	#N/A	3.6046	0.0044	0	0	0	0	gb|AK158451|riken|F930117N22	Mus musculus adult inner ear cDNA, RIKEN full-length enriched library, clone:F930117N22 product:hypothetical protein, full insert sequence. [AK158451]
A_55_P1992838	#N/A	#N/A	-3.7481	0.0113	0	0	Socs2	suppressor of cytokine signaling 2	ref|NM_007706|ref|NM_001168655|ref|NM_001168656|ref|NM_001168657	Mus musculus suppressor of cytokine signaling 2 (Socs2), transcript variant 1, mRNA [NM_007706]
A_55_P1992849	#N/A	#N/A	-2.3001	0.0237	0	0	Adrb3	adrenergic receptor, beta 3	ref|NM_013462|ens|ENSMUST00000081438|gb|AK136495|tc|TC1584849	Mus musculus adrenergic receptor, beta 3 (Adrb3), mRNA [NM_013462]
A_55_P1994112	#N/A	#N/A	13.4043	0.0027	0	0	Sema5b	sema domain, seven thrombospondin repeats (type 1 and type 1-like), transmembrane domain (TM) and short cytoplasmic domain, (semaphorin) 5B	ref|NM_013661|ens|ENSMUST00000050625|ref|XM_011245844|ref|XM_006521869	Mus musculus sema domain, seven thrombospondin repeats (type 1 and type 1-like), transmembrane domain (TM) and short cytoplasmic domain, (semaphorin) 5B (Sema5b), mRNA [NM_013661]
A_55_P1995512	#N/A	#N/A	2.4614	0.0416	0	0	Tmem139	transmembrane protein 139	ref|NM_175408|ens|ENSMUST00000095987|ref|XM_011241127|ref|XM_006505326	Mus musculus transmembrane protein 139 (Tmem139), mRNA [NM_175408]
A_55_P2000182	#N/A	#N/A	2.064	0.0156	0	0	Slc5a6	solute carrier family 5 (sodium-dependent vitamin transporter), member 6	ref|NM_001177621|ref|NM_177870|ref|NM_001177622|ens|ENSMUST00000114668	Mus musculus solute carrier family 5 (sodium-dependent vitamin transporter), member 6 (Slc5a6), transcript variant 1, mRNA [NM_001177621]
A_55_P2002578	#N/A	#N/A	2.5275	0.0016	0	0	Ephx1	epoxide hydrolase 1, microsomal	ref|NM_010145|ens|ENSMUST00000036928|gb|AK018249|gb|AK019071	Mus musculus epoxide hydrolase 1, microsomal (Ephx1), mRNA [NM_010145]
A_55_P2007249	#N/A	#N/A	-2.6523	0.004	0	0	Spdef	SAM pointed domain containing ets transcription factor	ref|NM_013891|ens|ENSMUST00000167489|ens|ENSMUST00000025054|ens|ENSMUST00000114870	Mus musculus SAM pointed domain containing ets transcription factor (Spdef), mRNA [NM_013891]
A_55_P2013823	#N/A	#N/A	3.8387	0.0042	0	0	Gal3st1	galactose-3-O-sulfotransferase 1	ref|NM_016922|ref|NM_001177703|ref|NM_001177691|ens|ENSMUST00000078757	Mus musculus galactose-3-O-sulfotransferase 1 (Gal3st1), transcript variant 1, mRNA [NM_016922]
A_55_P2015994	#N/A	#N/A	2.1955	0.0205	0	0	Fgf9	fibroblast growth factor 9	ref|NM_013518|ens|ENSMUST00000022545|ref|XM_006518554|ref|XM_006518553	Mus musculus fibroblast growth factor 9 (Fgf9), mRNA [NM_013518]
A_55_P2017116	#N/A	#N/A	7.4858	0.0045	0	0	0	0	ens|ENSMUST00000095071	predicted gene 8074 [Source:MGI Symbol;Acc:MGI:3643195] [ENSMUST00000095071]
A_55_P2020428	#N/A	#N/A	-2.9735	0.0308	0	0	Slc22a26	solute carrier family 22 (organic cation transporter), member 26	ref|NM_146232|ens|ENSMUST00000065634|gb|BC014805|gb|AJ132857	Mus musculus solute carrier family 22 (organic cation transporter), member 26 (Slc22a26), mRNA [NM_146232]
A_55_P2031471	#N/A	#N/A	3.6076	0.042	0	0	Rufy4	RUN and FYVE domain containing 4	ref|NM_001034060|ref|NM_001170641|ens|ENSMUST00000080167|ref|XM_006496129	Mus musculus RUN and FYVE domain containing 4 (Rufy4), transcript variant 2, mRNA [NM_001034060]
A_55_P2031939	#N/A	#N/A	5.4455	0.0004	0	0	Aqp4	aquaporin 4	ref|NM_009700|ens|ENSMUST00000079081|ref|XM_011246812|ref|XM_006525540	Mus musculus aquaporin 4 (Aqp4), mRNA [NM_009700]
A_55_P2033272	#N/A	#N/A	6.6937	0.0042	0	0	Treh	trehalase (brush-border membrane glycoprotein)	ref|NM_001277847|ref|NM_021481|ref|NM_001277851|ens|ENSMUST00000139389	Mus musculus trehalase (brush-border membrane glycoprotein) (Treh), transcript variant 2, mRNA [NM_001277847]
A_55_P2038514	#N/A	#N/A	2.8047	0.0088	0	0	Gm15411	predicted gene 15411	ref|XR_377244|ref|XR_377245|ref|XR_868720|ref|XR_868719	PREDICTED: Mus musculus predicted gene 15411 (Gm15411), transcript variant X15, misc_RNA [XR_377244]
A_55_P2040860	#N/A	#N/A	2.151	0.0405	0	0	Sun3	Sad1 and UNC84 domain containing 3	ref|NM_177576|ref|NM_001290519|ref|NM_001290520|ens|ENSMUST00000102909	Mus musculus Sad1 and UNC84 domain containing 3 (Sun3), transcript variant 2, mRNA [NM_177576]
A_55_P2044143	#N/A	#N/A	-3.5944	0.0187	0	0	Loxl4	lysyl oxidase-like 4	ref|NM_001164311|ref|NM_053083|ref|XM_006527297|ref|XM_006527298	Mus musculus lysyl oxidase-like 4 (Loxl4), transcript variant 1, mRNA [NM_001164311]
A_55_P2051796	#N/A	#N/A	-2.7839	0.0058	0	0	Gm128	predicted gene 128	ref|NM_001024841|gb|AK144488|ens|ENSMUST00000090815|tc|TC1641734	Mus musculus predicted gene 128 (Gm128), mRNA [NM_001024841]
A_55_P2052824	#N/A	#N/A	3.2071	0.018	0	0	Lrrc14b	leucine rich repeat containing 14B	ref|NM_001033042|ens|ENSMUST00000022064|gb|AK146537|gb|BC064819	Mus musculus leucine rich repeat containing 14B (Lrrc14b), mRNA [NM_001033042]
A_55_P2053320	#N/A	#N/A	2.0398	0.0115	0	0	Zfr2	zinc finger RNA binding protein 2	ref|NM_001034895|ens|ENSMUST00000132174|gb|AK122438|gb|AK033649	Mus musculus zinc finger RNA binding protein 2 (Zfr2), mRNA [NM_001034895]
A_55_P2055597	#N/A	#N/A	2.0516	0.0103	0	0	Enpp2	ectonucleotide pyrophosphatase/phosphodiesterase 2	ref|NM_001136077|ref|NM_001285995|ref|NM_001285994|ref|NM_015744	Mus musculus ectonucleotide pyrophosphatase/phosphodiesterase 2 (Enpp2), transcript variant 1, mRNA [NM_001136077]
A_55_P2056729	#N/A	#N/A	-2.5516	0.0158	0	0	Igfbp2	insulin-like growth factor binding protein 2	ref|NM_008342|ens|ENSMUST00000047328|ref|XM_006495707|gb|AK012703	Mus musculus insulin-like growth factor binding protein 2 (Igfbp2), mRNA [NM_008342]
A_55_P2059586	#N/A	#N/A	-4.1065	0.0325	0	0	Fmo3	flavin containing monooxygenase 3	ref|NM_008030|ens|ENSMUST00000142759|ens|ENSMUST00000028010|gb|AK050123	Mus musculus flavin containing monooxygenase 3 (Fmo3), mRNA [NM_008030]
A_55_P2062589	#N/A	#N/A	4.9587	0.0145	0	0	Mtnr1a	melatonin receptor 1A	ref|NM_008639|ref|XM_006509292|ref|XM_011242176|ref|XM_006509291	Mus musculus melatonin receptor 1A (Mtnr1a), mRNA [NM_008639]
A_55_P2071117	#N/A	#N/A	-2.3003	0.0414	0	0	Olfr1032	olfactory receptor 1032	ref|NM_146579|ens|ENSMUST00000062166|gb|BC113200|nap|NAP100466-001	Mus musculus olfactory receptor 1032 (Olfr1032), mRNA [NM_146579]
A_55_P2071132	#N/A	#N/A	2.6072	0.002	0	0	Tnfrsf23	tumor necrosis factor receptor superfamily, member 23	ref|NM_024290|ref|NM_001308111|ref|NR_131763|ens|ENSMUST00000035742	Mus musculus tumor necrosis factor receptor superfamily, member 23 (Tnfrsf23), transcript variant 1, mRNA [NM_024290]
A_55_P2087118	#N/A	#N/A	-2.0981	0.0173	0	0	Ly6i	lymphocyte antigen 6 complex, locus I	ref|NM_020498|ens|ENSMUST00000166694|ens|ENSMUST00000023250|ref|XM_006521214	Mus musculus lymphocyte antigen 6 complex, locus I (Ly6i), mRNA [NM_020498]
A_55_P2089500	#N/A	#N/A	-2.8824	0.0153	0	0	Cyp4f40	cytochrome P450, family 4, subfamily f, polypeptide 40	ref|NM_001101588|ens|ENSMUST00000165061|ref|XM_006524759|ref|XM_006524758	Mus musculus cytochrome P450, family 4, subfamily f, polypeptide 40 (Cyp4f40), mRNA [NM_001101588]
A_55_P2091928	#N/A	#N/A	2.5201	0.0028	0	0	Raet1b	retinoic acid early transcript beta	ref|NM_009017|ref|NM_198193|ens|ENSMUST00000065527|ens|ENSMUST00000181645	Mus musculus retinoic acid early transcript beta (Raet1b), mRNA [NM_009017]
A_55_P2092219	#N/A	#N/A	-4.4773	0.0058	0	0	Serpina9	serine (or cysteine) peptidase inhibitor, clade A (alpha-1 antiproteinase, antitrypsin), member 9	ref|NM_027997|ref|XM_006516241|ref|XM_006516242|ref|XM_006516243	Mus musculus serine (or cysteine) peptidase inhibitor, clade A (alpha-1 antiproteinase, antitrypsin), member 9 (Serpina9), mRNA [NM_027997]
A_55_P2096043	#N/A	#N/A	2.1847	0.0031	0	0	Acot11	acyl-CoA thioesterase 11	ref|NM_025590|ens|ENSMUST00000102762|ref|XM_006503181|ref|XM_011240557	Mus musculus acyl-CoA thioesterase 11 (Acot11), mRNA [NM_025590]
A_55_P2098100	#N/A	#N/A	2.9165	0.0116	0	0	Arhgef9	CDC42 guanine nucleotide exchange factor (GEF) 9	ref|NM_001290385|ref|NM_001033329|ref|NM_001290384|ens|ENSMUST00000113883	Mus musculus CDC42 guanine nucleotide exchange factor (GEF) 9 (Arhgef9), transcript variant 3, mRNA [NM_001290385]
A_55_P2101776	#N/A	#N/A	3.9403	0.0067	0	0	Adora1	adenosine A1 receptor	ref|NM_001008533|ref|NM_001282945|ref|NM_001039510|ref|NM_001291930	Mus musculus adenosine A1 receptor (Adora1), transcript variant 2, mRNA [NM_001008533]
A_55_P2102065	#N/A	#N/A	5.4936	0.0165	0	0	Gm10639	predicted gene 10639	ref|NM_001122660|ens|ENSMUST00000119823|gb|BC030173|ens|ENSMUST00000121273	Mus musculus predicted gene 10639 (Gm10639), mRNA [NM_001122660]
A_55_P2102769	#N/A	#N/A	-2.2958	0.0018	0	0	Abca8a	ATP-binding cassette, sub-family A (ABC1), member 8a	ref|NM_153145|ens|ENSMUST00000106664|ens|ENSMUST00000106662|ens|ENSMUST00000046223	Mus musculus ATP-binding cassette, sub-family A (ABC1), member 8a (Abca8a), mRNA [NM_153145]
A_55_P2105452	#N/A	#N/A	-2.046	0.0004	0	0	Foxp1	forkhead box P1	ref|NM_001197321|ref|NM_053202|ens|ENSMUST00000177227|ens|ENSMUST00000177208	Mus musculus forkhead box P1 (Foxp1), transcript variant 2, mRNA [NM_001197321]
A_55_P2105820	#N/A	#N/A	2.1254	0.0251	0	0	Tbc1d31	TBC1 domain family, member 31	ref|NM_001081396|ens|ENSMUST00000161329	Mus musculus TBC1 domain family, member 31 (Tbc1d31), transcript variant 1, mRNA [NM_001081396]
A_55_P2106255	#N/A	#N/A	2.2737	0.0406	0	0	Mbnl3	muscleblind-like 3 (Drosophila)	ref|NM_134163|ref|XM_006541436|ref|XM_006541435|ref|XM_006541437	Mus musculus muscleblind-like 3 (Drosophila) (Mbnl3), mRNA [NM_134163]
A_55_P2106608	#N/A	#N/A	-5.3852	0.0077	0	0	Tcf24	transcription factor 24	ref|NM_001285425|ens|ENSMUST00000097824|ref|XM_006495431|ref|XM_006495432	Mus musculus transcription factor 24 (Tcf24), mRNA [NM_001285425]
A_55_P2111980	#N/A	#N/A	-43.1212	0.0012	0	0	Hsd3b5	hydroxy-delta-5-steroid dehydrogenase, 3 beta- and steroid delta-isomerase 5	ref|NM_008295|ens|ENSMUST00000044094|gb|L41519|gb|BC012715	Mus musculus hydroxy-delta-5-steroid dehydrogenase, 3 beta- and steroid delta-isomerase 5 (Hsd3b5), mRNA [NM_008295]
A_55_P2114110	#N/A	#N/A	-2.3469	0.0043	0	0	Cadm4	cell adhesion molecule 4	ref|NM_153112|ens|ENSMUST00000068023|gb|AK143204|tc|TC1647697	Mus musculus cell adhesion molecule 4 (Cadm4), mRNA [NM_153112]
A_55_P2115955	#N/A	#N/A	2.5591	0.0053	0	0	Raet1e	retinoic acid early transcript 1E	ref|NM_198193|ref|NM_009017|ref|NM_009016|ref|NM_009018	Mus musculus retinoic acid early transcript 1E (Raet1e), mRNA [NM_198193]
A_55_P2116978	#N/A	#N/A	-2.5237	0.0031	0	0	Neb	nebulin	ref|NM_010889|ens|ENSMUST00000075301|ens|ENSMUST00000135200|ens|ENSMUST00000137410	Mus musculus nebulin (Neb), mRNA [NM_010889]
A_55_P2121408	#N/A	#N/A	2.0318	0.0198	0	0	Tpm2	tropomyosin 2, beta	ref|NM_001277875|ref|NM_001277876|ens|ENSMUST00000133355|ens|ENSMUST00000107914	Mus musculus tropomyosin 2, beta (Tpm2), transcript variant Tpm2.3, mRNA [NM_001277875]
A_55_P2124712	#N/A	#N/A	3.2927	0.0099	0	0	Ces2c	carboxylesterase 2C	ref|NM_145603|ref|NR_033726|ens|ENSMUST00000043209|ens|ENSMUST00000055052	Mus musculus carboxylesterase 2C (Ces2c), mRNA [NM_145603]
A_55_P2126940	#N/A	#N/A	6.5411	0.0112	0	0	0	0	nap|NAP025353-001	Unknown
A_55_P2127179	#N/A	#N/A	-3.0927	0.0048	0	0	0	0	ens|ENSMUST00000178160|nap|NAP023935-001	predicted gene 379 [Source:MGI Symbol;Acc:MGI:2685225] [ENSMUST00000178160]
A_55_P2129449	#N/A	#N/A	-4.6669	0.0223	0	0	Sult3a1	sulfotransferase family 3A, member 1	ref|NM_020565|ens|ENSMUST00000092597|gb|BC125593|gb|BC125595	Mus musculus sulfotransferase family 3A, member 1 (Sult3a1), mRNA [NM_020565]
A_55_P2129696	#N/A	#N/A	-2.7318	0.0306	0	0	Smad9	SMAD family member 9	ref|NM_019483|ens|ENSMUST00000029371|ref|XM_006501728|ref|XM_006501729	Mus musculus SMAD family member 9 (Smad9), mRNA [NM_019483]
A_55_P2133337	#N/A	#N/A	3.2916	0.0007	0	0	March9	membrane-associated ring finger (C3HC4) 9	ens|ENSMUST00000040307|tc|TC1648317|nap|NAP022455-001	membrane-associated ring finger (C3HC4) 9 [Source:MGI Symbol;Acc:MGI:2446144] [ENSMUST00000040307]
A_55_P2136561	#N/A	#N/A	3.235	0.0027	0	0	Gm10680	predicted gene 10680	gb|AK143344|riken|E330010G03	Mus musculus 2 days pregnant adult female ovary cDNA, RIKEN full-length enriched library, clone:E330010G03 product:hypothetical Ankyrin/Leucine-rich region profile containing protein, full insert sequence. [AK143344]
A_55_P2137828	#N/A	#N/A	22.9428	0.0052	0	0	Gprc5b	G protein-coupled receptor, family C, group 5, member B	ref|NM_022420|ens|ENSMUST00000008878|gb|AK032047|gb|BC020004	Mus musculus G protein-coupled receptor, family C, group 5, member B (Gprc5b), transcript variant 2, mRNA [NM_022420]
A_55_P2139814	#N/A	#N/A	-2.2005	0.0033	0	0	Fgf13	fibroblast growth factor 13	ref|NM_001290414|ens|ENSMUST00000131319|ens|ENSMUST00000124402|ref|XM_006527795	Mus musculus fibroblast growth factor 13 (Fgf13), transcript variant 2, mRNA [NM_001290414]
A_55_P2140453	#N/A	#N/A	-2.0924	0.0147	0	0	Myh6	myosin, heavy polypeptide 6, cardiac muscle, alpha	ref|NM_001164171|ref|NM_010856|ens|ENSMUST00000111456|ens|ENSMUST00000134256	Mus musculus myosin, heavy polypeptide 6, cardiac muscle, alpha (Myh6), transcript variant 1, mRNA [NM_001164171]
A_55_P2142222	#N/A	#N/A	-2.191	0.0445	0	0	Serpina3h	serine (or cysteine) peptidase inhibitor, clade A, member 3H	ref|NR_033450|ens|ENSMUST00000116393|nap|NAP029450-1	Mus musculus serine (or cysteine) peptidase inhibitor, clade A, member 3H (Serpina3h), non-coding RNA [NR_033450]
A_55_P2142724	#N/A	#N/A	-2.4711	0.0062	0	0	0	0	nap|NAP017825-001|nap|NAP115223-1|nap|NAP115459-1|nap|NAP071864-1	Unknown
A_55_P2143219	#N/A	#N/A	2.2474	0.0018	0	0	Rasgrp2	RAS, guanyl releasing protein 2	ref|NM_011242|ens|ENSMUST00000133968|ens|ENSMUST00000139522|ens|ENSMUST00000146831	Mus musculus RAS, guanyl releasing protein 2 (Rasgrp2), mRNA [NM_011242]
A_55_P2143233	#N/A	#N/A	2.2991	0.0009	0	0	Rasgrp2	RAS, guanyl releasing protein 2	ref|NM_011242|ens|ENSMUST00000113468|ens|ENSMUST00000146601|ens|ENSMUST00000150713	Mus musculus RAS, guanyl releasing protein 2 (Rasgrp2), mRNA [NM_011242]
A_55_P2143923	#N/A	#N/A	-2.977	0.0228	0	0	Slc13a2	solute carrier family 13 (sodium-dependent dicarboxylate transporter), member 2	ref|NM_022411|ens|ENSMUST00000001122|ref|XM_006532648|gb|AK140972	Mus musculus solute carrier family 13 (sodium-dependent dicarboxylate transporter), member 2 (Slc13a2), mRNA [NM_022411]
A_55_P2150876	#N/A	#N/A	26.8909	0.008	0	0	Als2cr12	amyotrophic lateral sclerosis 2 (juvenile) chromosome region, candidate 12 (human)	ref|NM_175370|ens|ENSMUST00000055313|ref|XM_006495618|ref|XM_011238418	Mus musculus amyotrophic lateral sclerosis 2 (juvenile) chromosome region, candidate 12 (human) (Als2cr12), mRNA [NM_175370]
A_55_P2153517	#N/A	#N/A	-6.6515	0.0029	0	0	Enho	energy homeostasis associated	ref|NM_027147|ens|ENSMUST00000127306|gb|AK208424|gb|AK206108	Mus musculus energy homeostasis associated (Enho), mRNA [NM_027147]
A_55_P2159264	#N/A	#N/A	-3.4307	0.0049	0	0	Lifr	leukemia inhibitory factor receptor	ref|NM_001113386|ens|ENSMUST00000164529|ref|XM_006519970|ref|XM_006519971	Mus musculus leukemia inhibitory factor receptor (Lifr), transcript variant 2, mRNA [NM_001113386]
A_55_P2161347	#N/A	#N/A	-2.7904	0.04	0	0	Acmsd	amino carboxymuconate semialdehyde decarboxylase	ref|NM_001033041|ens|ENSMUST00000038006|ens|ENSMUST00000186537|gb|AK143962	Mus musculus amino carboxymuconate semialdehyde decarboxylase (Acmsd), mRNA [NM_001033041]
A_55_P2164977	#N/A	#N/A	-19.4584	0.0028	0	0	Tcf24	transcription factor 24	ref|NM_001285425|ref|XM_006495431|ref|XM_006495432|ens|ENSMUST00000185184	Mus musculus transcription factor 24 (Tcf24), mRNA [NM_001285425]
A_55_P2170454	#N/A	#N/A	3.956	0.044	0	0	Gsta2	glutathione S-transferase, alpha 2 (Yc2)	ref|NM_008182|ens|ENSMUST00000034902|ref|XM_011242663|ref|XM_006510814	Mus musculus glutathione S-transferase, alpha 2 (Yc2) (Gsta2), mRNA [NM_008182]
A_55_P2171081	#N/A	#N/A	2.0968	0.0071	0	0	Sec22c	SEC22 vesicle trafficking protein homolog C (S. cerevisiae)	ref|NM_178677|ref|NM_001164562|ens|ENSMUST00000111560|ens|ENSMUST00000078547	Mus musculus SEC22 vesicle trafficking protein homolog C (S. cerevisiae) (Sec22c), transcript variant 1, mRNA [NM_178677]
A_55_P2177911	#N/A	#N/A	-7.8323	0.004	0	0	Lepr	leptin receptor	ref|NM_010704|ref|NM_146146|ens|ENSMUST00000151733|ens|ENSMUST00000102777	Mus musculus leptin receptor (Lepr), transcript variant 2, mRNA [NM_010704]
A_55_P2178578	#N/A	#N/A	4.3984	0.0192	0	0	Tmprss4	transmembrane protease, serine 4	ref|NM_145403|ens|ENSMUST00000170069|ens|ENSMUST00000034599|gb|AK078890	Mus musculus transmembrane protease, serine 4 (Tmprss4), mRNA [NM_145403]
A_55_P2183914	#N/A	#N/A	2.616	0.0205	0	0	Gm7120	predicted gene 7120	ref|NM_001177666|ref|NM_001039244|ens|ENSMUST00000176171|ens|ENSMUST00000099147	Mus musculus predicted gene 7120 (Gm7120), transcript variant 2, mRNA [NM_001177666]
A_55_P2212161	#N/A	#N/A	2.986	0.0185	0	0	2310034O05Rik	RIKEN cDNA 2310034O05 gene	gb|AK009622|riken|2310034O05|nap|NAP090723-1	Mus musculus adult male tongue cDNA, RIKEN full-length enriched library, clone:2310034O05 product:unclassifiable, full insert sequence. [AK009622]
A_55_P2257381	#N/A	#N/A	2.8824	0.0015	0	0	E330011O21Rik	RIKEN cDNA E330011O21 gene	ref|NR_045698|gb|AK087725|riken|E330011O21|nap|NAP119060-1	Mus musculus RIKEN cDNA E330011O21 gene (E330011O21Rik), long non-coding RNA [NR_045698]
A_55_P2315012	#N/A	#N/A	2.8942	0.0327	0	0	4930458D05Rik	RIKEN cDNA 4930458D05 gene	gb|AK036594|gb|AK015484|gb|AV376221|tc|TC1598122	Mus musculus adult male bone cDNA, RIKEN full-length enriched library, clone:9830138L07 product:unclassifiable, full insert sequence. [AK036594]
A_55_P2326260	#N/A	#N/A	2.0346	0.0224	0	0	4930525G20Rik	RIKEN cDNA 4930525G20 gene	ref|NR_045194|gb|AK029746|tc|TC1597731|riken|4930525G20	Mus musculus RIKEN cDNA 4930525G20 gene (4930525G20Rik), long non-coding RNA [NR_045194]
A_55_P2346644	#N/A	#N/A	2.0413	0.0031	0	0	C730037M02Rik	RIKEN cDNA C730037M02 gene	gb|AK149560|gb|BY761145|riken|C730037M02	Mus musculus adult male liver tumor cDNA, RIKEN full-length enriched library, clone:C730037M02 product:hypothetical protein, full insert sequence. [AK149560]
A_55_P2372325	#N/A	#N/A	2.6557	0.0025	0	0	Zim3	zinc finger, imprinted 3	ref|NR_036631|gb|AF365932	Mus musculus zinc finger, imprinted 3 (Zim3), antisense RNA [NR_036631]
A_55_P2387665	#N/A	#N/A	2.9477	0.0191	0	0	9130221J18Rik	RIKEN cDNA 9130221J18 gene	gb|AK033690|gb|AV377066|tc|TC1708633|riken|9130221J18	Mus musculus adult male cecum cDNA, RIKEN full-length enriched library, clone:9130221J18 product:unclassifiable, full insert sequence. [AK033690]
A_55_P2488169	#N/A	#N/A	7.174	0.0005	0	0	Snhg11	small nucleolar RNA host gene 11	ref|NM_175692|gb|BC072638|gb|BC058997|gb|BC060623	Mus musculus small nucleolar RNA host gene 11 (Snhg11), mRNA [NM_175692]
A_55_P2503990	#N/A	#N/A	-3.4898	0.0056	0	0	Sort1	sortilin 1	ref|NM_001271599|ref|NM_019972|ens|ENSMUST00000129755|ens|ENSMUST00000135636	Mus musculus sortilin 1 (Sort1), transcript variant 1, mRNA [NM_001271599]
A_55_P2506350	#N/A	#N/A	-9.1943	0.0027	0	0	Lepr	leptin receptor	ref|NM_001122899|ens|ENSMUST00000106921|gb|BC082551|tc|TC1586489	Mus musculus leptin receptor (Lepr), transcript variant 3, mRNA [NM_001122899]
A_55_P2509993	#N/A	#N/A	2.2833	0.0464	0	0	Dreh	down-regulated in hepatocellular carcinoma	ref|NR_105051|gb|AK050349|tc|TC1658790|riken|C730040E01	Mus musculus down-regulated in hepatocellular carcinoma (Dreh), long non-coding RNA [NR_105051]
A_55_P2622908	#N/A	#N/A	-3.308	0.0058	0	0	BC029214	cDNA sequence BC029214	ens|ENSMUST00000133919|ens|ENSMUST00000132596|ref|XM_006497867|ref|XM_006497865	cDNA sequence BC029214 [Source:MGI Symbol;Acc:MGI:2442831] [ENSMUST00000133919]
A_55_P2716491	#N/A	#N/A	-2.2313	0.0092	0	0	Ang6	angiogenin, ribonuclease A family, member 6	ref|NM_001011876|ref|NM_007448|ens|ENSMUST00000096869|ens|ENSMUST00000066719	Mus musculus angiogenin, ribonuclease A family, member 6 (Ang6), mRNA [NM_001011876]
A_55_P2720213	#N/A	#N/A	2.5324	0.0079	0	0	Raet1a	retinoic acid early transcript 1, alpha	ref|NM_009016|ref|NM_020030|ref|NM_009017|ref|NM_198193	Mus musculus retinoic acid early transcript 1, alpha (Raet1a), mRNA [NM_009016]
A_55_P2720918	#N/A	#N/A	-6.8687	0.0259	0	0	Lppr1	lipid phosphate phosphatase-related protein type 1	ens|ENSMUST00000137884|gb|AK031416|riken|6030426F17|nap|NAP075569-1	lipid phosphate phosphatase-related protein type 1 [Source:MGI Symbol;Acc:MGI:2445015] [ENSMUST00000137884]
A_55_P2722070	#N/A	#N/A	-2.0207	0.0093	0	0	Irf6	interferon regulatory factor 6	ens|ENSMUST00000140066|gb|AK037932|tc|TC1613999|riken|A130064P06	interferon regulatory factor 6 [Source:MGI Symbol;Acc:MGI:1859211] [ENSMUST00000140066]
A_55_P2724604	#N/A	#N/A	-2.2687	0.0017	0	0	Aph1c	anterior pharynx defective 1c homolog (C. elegans)	ref|NM_026674|ens|ENSMUST00000169282|ref|XM_006511398|gb|BC050923	Mus musculus anterior pharynx defective 1c homolog (C. elegans) (Aph1c), mRNA [NM_026674]
A_55_P2727424	#N/A	#N/A	2.2159	0.0009	0	0	Med27	mediator complex subunit 27	ref|NM_029615|ens|ENSMUST00000113830|gb|AK009764|gb|AK147181	Mus musculus mediator complex subunit 27 (Med27), transcript variant 2, mRNA [NM_029615]
A_55_P2728778	#N/A	#N/A	2.1512	0.0247	0	0	1700041B01Rik	RIKEN cDNA 1700041B01 gene	ref|XR_875473|ref|XR_881789|gb|AK018845|gb|BY706654	PREDICTED: Mus musculus RIKEN cDNA 1700041B01 gene (1700041B01Rik), transcript variant X1, misc_RNA [XR_875473]
A_55_P2734037	#N/A	#N/A	2.6258	0.0285	0	0	4930458D05Rik	RIKEN cDNA 4930458D05 gene	gb|AK133807|gb|AK036594|gb|AK015484|tc|TC1598122	Mus musculus 8 days embryo whole body cDNA, RIKEN full-length enriched library, clone:5730424C05 product:unclassifiable, full insert sequence. [AK133807]
A_55_P2734207	#N/A	#N/A	-2.217	0.0009	0	0	Gm26908	predicted gene, 26908	ref|XR_874790|ref|XR_878928|ref|XR_874791|ref|XR_878929	PREDICTED: Mus musculus predicted gene, 26908 (Gm26908), transcript variant X2, ncRNA [XR_874790]
A_55_P2738027	#N/A	#N/A	2.1129	0.0027	0	0	Extl1	exostoses (multiple)-like 1	ref|NM_019578|ens|ENSMUST00000030643|ref|XM_011250306|ref|XM_006539058	Mus musculus exostoses (multiple)-like 1 (Extl1), mRNA [NM_019578]
A_55_P2739022	#N/A	#N/A	2.6001	0.0011	0	0	Acot11	acyl-CoA thioesterase 11	ref|NM_025590|ens|ENSMUST00000140541|ens|ENSMUST00000102762|ref|XM_006503181	Mus musculus acyl-CoA thioesterase 11 (Acot11), mRNA [NM_025590]
A_55_P2739057	#N/A	#N/A	-2.4892	0.006	0	0	Irf5	interferon regulatory factor 5	gb|AK171356|gb|AA209012|tc|TC1648018|tc|TC1685649	Mus musculus B6-derived CD11 +ve dendritic cells cDNA, RIKEN full-length enriched library, clone:F730038M10 product:interferon regulatory factor 5, full insert sequence. [AK171356]
A_55_P2741664	#N/A	#N/A	-2.1017	0.0189	0	0	Psd	pleckstrin and Sec7 domain containing	ref|NM_028627|ens|ENSMUST00000096029|ens|ENSMUST00000041391|ref|XM_006527389	Mus musculus pleckstrin and Sec7 domain containing (Psd), mRNA [NM_028627]
A_55_P2745134	#N/A	#N/A	2.7193	0.0022	0	0	Raet1b	retinoic acid early transcript beta	ref|NM_009017|ref|NM_198193|ref|NM_009018|ref|NM_020030	Mus musculus retinoic acid early transcript beta (Raet1b), mRNA [NM_009017]
A_55_P2752088	#N/A	#N/A	3.531	0.0357	0	0	Per3	period circadian clock 3	ref|NM_001289878|ref|NM_001289877|ref|NM_011067|ens|ENSMUST00000138052	Mus musculus period circadian clock 3 (Per3), transcript variant 3, mRNA [NM_001289878]
A_55_P2765218	#N/A	#N/A	4.6237	0.0107	0	0	9130409I23Rik	RIKEN cDNA 9130409I23 gene	ref|NM_001033819|ref|XM_011238849|gb|AK162201|gb|AK136575	Mus musculus RIKEN cDNA 9130409I23 gene (9130409I23Rik), mRNA [NM_001033819]
A_55_P2788594	#N/A	#N/A	9.6837	0.0016	0	0	Mmp12	matrix metallopeptidase 12	ref|NM_008605|ens|ENSMUST00000127722|ens|ENSMUST00000005950|ref|XM_011242357	Mus musculus matrix metallopeptidase 12 (Mmp12), mRNA [NM_008605]
A_55_P2796609	#N/A	#N/A	-2.5252	0.0027	0	0	Dnmt3b	DNA methyltransferase 3B	ref|NM_001003961|ref|NM_001003960|ref|NM_001122997|ref|NM_001271744	Mus musculus DNA methyltransferase 3B (Dnmt3b), transcript variant 1, mRNA [NM_001003961]
A_55_P2797167	#N/A	#N/A	-2.7259	0.0057	0	0	Ndrg1	N-myc downstream regulated gene 1	ref|NM_008681|ens|ENSMUST00000005256|gb|U52073|gb|AK004548	Mus musculus N-myc downstream regulated gene 1 (Ndrg1), mRNA [NM_008681]
A_55_P2797793	#N/A	#N/A	2.0359	0.0118	0	0	Robo1	roundabout homolog 1 (Drosophila)	ref|NM_019413|ens|ENSMUST00000023600|gb|Y17793|gb|AV274141	Mus musculus roundabout homolog 1 (Drosophila) (Robo1), mRNA [NM_019413]
A_55_P2803915	#N/A	#N/A	-2.1007	0.0201	0	0	0	0	gb|BB113845	BB113845 RIKEN full-length enriched, adult male urinary bladder Mus musculus cDNA clone 9530042N15 3'. [BB113845]
A_55_P2805919	#N/A	#N/A	-212.758	0.0027	0	0	Slco1a1	solute carrier organic anion transporter family, member 1a1	ref|NM_013797|ens|ENSMUST00000042119|ref|XM_006506958|ref|XM_006506959	Mus musculus solute carrier organic anion transporter family, member 1a1 (Slco1a1), mRNA [NM_013797]
A_55_P2806793	#N/A	#N/A	-3.6166	0.0004	0	0	Avpr1a	arginine vasopressin receptor 1A	ref|NM_016847|ens|ENSMUST00000020323|gb|D49730|gb|AK155952	Mus musculus arginine vasopressin receptor 1A (Avpr1a), mRNA [NM_016847]
A_55_P2813436	#N/A	#N/A	2.0129	0.015	0	0	Ociad2	OCIA domain containing 2	ref|NM_026950|ens|ENSMUST00000087195|ref|XM_006504014|gb|BC044883	Mus musculus OCIA domain containing 2 (Ociad2), mRNA [NM_026950]
A_55_P2837366	#N/A	#N/A	4.7352	0.0031	0	0	Apoa4	apolipoprotein A-IV	ref|NM_007468|ens|ENSMUST00000034585|gb|BC118923|gb|M64248	Mus musculus apolipoprotein A-IV (Apoa4), mRNA [NM_007468]
A_55_P2900514	#N/A	#N/A	2.0529	0.0055	0	0	2010107G23Rik	RIKEN cDNA 2010107G23 gene	ref|NM_027251|ens|ENSMUST00000141144|ens|ENSMUST00000156798|ens|ENSMUST00000064050	Mus musculus RIKEN cDNA 2010107G23 gene (2010107G23Rik), mRNA [NM_027251]
A_55_P2902293	#N/A	#N/A	-2.3847	0.0467	0	0	Gm36393	predicted gene, 36393	ref|XR_866399|ref|XR_885850|ref|XR_866400|ref|XR_374622	PREDICTED: Mus musculus predicted gene, 36393 (Gm36393), transcript variant X3, ncRNA [XR_866399]
A_55_P2910367	#N/A	#N/A	-2.16	0.0104	0	0	Stxbp5l	syntaxin binding protein 5-like	ref|NM_172440|ref|NM_001114612|ref|NM_001114613|ref|NM_001114611	Mus musculus syntaxin binding protein 5-like (Stxbp5l), transcript variant xb, mRNA [NM_172440]
A_55_P2927762	#N/A	#N/A	-8.3373	0.0229	0	0	Sort1	sortilin 1	ref|NM_019972|ref|NM_001271599|ens|ENSMUST00000102632|ens|ENSMUST00000135636	Mus musculus sortilin 1 (Sort1), transcript variant 2, mRNA [NM_019972]
A_66_P104979	#N/A	#N/A	-2.357	0.0104	0	0	Cyp2c44	cytochrome P450, family 2, subfamily c, polypeptide 44	ref|NM_001167905|ref|NM_001001446|ens|ENSMUST00000026211|gb|AK149451	Mus musculus cytochrome P450, family 2, subfamily c, polypeptide 44 (Cyp2c44), transcript variant 2, mRNA [NM_001167905]
A_66_P106148	#N/A	#N/A	3.3565	0.0017	0	0	Raet1c	retinoic acid early transcript gamma	ref|NM_009018|gb|BC132028|gb|BC132032|gb|D64162	Mus musculus retinoic acid early transcript gamma (Raet1c), mRNA [NM_009018]
A_66_P107231	#N/A	#N/A	-3.374	0.0394	0	0	Loxl4	lysyl oxidase-like 4	ref|NM_001164311|ref|NM_053083|ens|ENSMUST00000026190|ref|XM_006527297	Mus musculus lysyl oxidase-like 4 (Loxl4), transcript variant 1, mRNA [NM_001164311]
A_66_P108979	#N/A	#N/A	-2.6546	0.0482	0	0	Olfr1535	olfactory receptor 1535	ref|NM_207572|ens|ENSMUST00000068163|tc|NP1221574|nap|NAP057223-1	Mus musculus olfactory receptor 1535 (Olfr1535), mRNA [NM_207572]
A_66_P109141	#N/A	#N/A	-2.937	0.0108	0	0	Gm38416	predicted gene, 38416	ref|NR_131057|gb|AK028839|tc|TC1614361|riken|4732460I24	Mus musculus predicted gene, 38416 (Gm38416), long non-coding RNA [NR_131057]
A_66_P110109	#N/A	#N/A	-2.2916	0.0223	0	0	Tango6	transport and golgi organization 6	ref|NM_173037|ens|ENSMUST00000048359|ref|XM_006531063|gb|AK077757	Mus musculus transport and golgi organization 6 (Tango6), mRNA [NM_173037]
A_66_P110660	#N/A	#N/A	4.0414	0.0358	0	0	0	0	gb|AK050026|riken|C730003N19|nap|NAP116999-1	Mus musculus adult male liver tumor cDNA, RIKEN full-length enriched library, clone:C730003N19 product:unclassifiable, full insert sequence. [AK050026]
A_66_P113363	#N/A	#N/A	-3.2238	0.0151	0	0	5730420D15Rik	RIKEN cDNA 5730420D15 gene	ref|NR_045338|ref|NR_045339|gb|AK017586|tc|NP741059	Mus musculus RIKEN cDNA 5730420D15 gene (5730420D15Rik), transcript variant 1, long non-coding RNA [NR_045338]
A_66_P114193	#N/A	#N/A	-2.2124	0.0113	0	0	0	0	ens|ENSMUST00000178794|gb|BC160364|gb|BC145568|tc|TC1600143	olfactory receptor 106, pseudogene [Source:MGI Symbol;Acc:MGI:2177489] [ENSMUST00000178794]
A_66_P114333	#N/A	#N/A	2.7138	0.0041	0	0	Tlr12	toll-like receptor 12	ref|NM_205823|ens|ENSMUST00000074829|gb|AK137624|gb|AK143385	Mus musculus toll-like receptor 12 (Tlr12), mRNA [NM_205823]
A_66_P117542	#N/A	#N/A	25.6493	0.0023	0	0	Als2cr12	amyotrophic lateral sclerosis 2 (juvenile) chromosome region, candidate 12 (human)	ref|NM_175370|ens|ENSMUST00000185953|ens|ENSMUST00000191252|ens|ENSMUST00000055313	Mus musculus amyotrophic lateral sclerosis 2 (juvenile) chromosome region, candidate 12 (human) (Als2cr12), mRNA [NM_175370]
A_66_P119751	#N/A	#N/A	-37.8742	0.0024	0	0	Adgrf1	adhesion G protein-coupled receptor F1	ens|ENSMUST00000047399|ref|XM_006525120|ref|XM_006525121|ref|XR_876591	adhesion G protein-coupled receptor F1 [Source:MGI Symbol;Acc:MGI:1924846] [ENSMUST00000047399]
A_66_P120521	#N/A	#N/A	-18.8559	0.022	0	0	0	0	gb|AK030177|gb|AV280064|riken|4933412A06|nap|NAP073559-1	Mus musculus adult male testis cDNA, RIKEN full-length enriched library, clone:4933412A06 product:unclassifiable, full insert sequence. [AK030177]
A_66_P123297	#N/A	#N/A	4.0153	0.0156	0	0	Elovl3	elongation of very long chain fatty acids (FEN1/Elo2, SUR4/Elo3, yeast)-like 3	ref|NM_007703|ens|ENSMUST00000043739|ref|XM_006526624|gb|AK004901	Mus musculus elongation of very long chain fatty acids (FEN1/Elo2, SUR4/Elo3, yeast)-like 3 (Elovl3), mRNA [NM_007703]
A_66_P124454	#N/A	#N/A	-2.2324	0.0092	0	0	Gm28178	predicted gene 28178	ref|XR_373403|ref|XR_399315|gb|AK081439|riken|C130017P08	PREDICTED: Mus musculus predicted gene 28178 (Gm28178), ncRNA [XR_373403]
A_66_P124995	#N/A	#N/A	-2.0563	0.0235	0	0	AI481877	expressed sequence AI481877	ref|XM_006538421|ref|XM_006543855|ens|ENSMUST00000107547|gb|XM_001476641	PREDICTED: Mus musculus expressed sequence AI481877 (AI481877), mRNA [XM_006538421]
A_66_P127607	#N/A	#N/A	-2.6442	0.0116	0	0	Sult5a1	sulfotransferase family 5A, member 1	ref|NM_020564|ens|ENSMUST00000152722|ens|ENSMUST00000126951|ens|ENSMUST00000146007	Mus musculus sulfotransferase family 5A, member 1 (Sult5a1), mRNA [NM_020564]
A_66_P127661	#N/A	#N/A	-2.2823	0.0122	0	0	Gm32643	predicted gene, 32643	ref|XR_863775|ref|XR_863777|ref|XR_863776|ref|XR_863780	PREDICTED: Mus musculus predicted gene, 32643 (Gm32643), transcript variant X5, ncRNA [XR_863775]
A_66_P128603	#N/A	#N/A	-12.9249	0.0389	0	0	0	0	gb|BX527097|tc|TC1654230	BX527097 Soares mouse lymph node NbMLN Mus musculus cDNA clone IMAGp998E141564 ; IMAGE:642805, mRNA sequence [BX527097]
A_66_P128721	#N/A	#N/A	2.1995	0.0339	0	0	2310034O05Rik	RIKEN cDNA 2310034O05 gene	ref|NR_040679|gb|AK009622|tc|TC1651552|riken|2310034O05	Mus musculus RIKEN cDNA 2310034O05 gene (2310034O05Rik), long non-coding RNA [NR_040679]
A_66_P129946	#N/A	#N/A	-2.6789	0.0091	0	0	Cela2a	chymotrypsin-like elastase family, member 2A	ref|NM_007919|ens|ENSMUST00000102481|ens|ENSMUST00000176781|ens|ENSMUST00000127962	Mus musculus chymotrypsin-like elastase family, member 2A (Cela2a), mRNA [NM_007919]
A_66_P130918	#N/A	#N/A	2.1487	0.0031	0	0	Apoc2	apolipoprotein C-II	ref|NM_001277944|ens|ENSMUST00000127648|ens|ENSMUST00000142352|ens|ENSMUST00000150569	Mus musculus apolipoprotein C-II (Apoc2), mRNA [NM_001277944]
A_66_P132970	#N/A	#N/A	4.2389	0.0068	0	0	BC049987	cDNA sequence BC049987	gb|BC049987|gb|BC042789|tc|TC1664069	Mus musculus cDNA sequence BC049987, mRNA (cDNA clone IMAGE:5388773), partial cds. [BC049987]
A_66_P134474	#N/A	#N/A	-2.3991	0.0085	0	0	Ang3	angiogenin, ribonuclease A family, member 3	ref|NM_001123394|ref|NM_007448|ref|NM_001011876|ens|ENSMUST00000066719	Mus musculus angiogenin, ribonuclease A family, member 3 (Ang3), mRNA [NM_001123394]
A_66_P135046	#N/A	#N/A	4.0504	0.0113	0	0	Per3	period circadian clock 3	ref|NM_011067|ref|NM_001289878|ref|NM_001289877|ens|ENSMUST00000128283	Mus musculus period circadian clock 3 (Per3), transcript variant 2, mRNA [NM_011067]
A_66_P139633	#N/A	#N/A	2.2098	0.0068	0	0	Fcor	Foxo1 corepressor	ref|XR_378678|ref|XR_404668|gb|AK019114|gb|AK019104	PREDICTED: Mus musculus Foxo1 corepressor (Fcor), misc_RNA [XR_378678]

## Sheet: sup table S2
Table S2: Results of filtering process on metabolomics and transcriptomics integrated data. This process, presented by fig 6, led to 8 metabolites linked to 115 genes, each of these being significantly modulated between KO and WT mice under high fat diet. Genes varying accordingly to diet were filtered out (column WT under HFD/STD contains only q-values greater than 0.05). Genes present several t…
Metabolite				Gene				Gene - Metabolite relation from KEGG and Reactome
Metabolite name	KO/WT under HFD		Global ANOVA: genotype effect	Gene Symbol	KO/WT under HFD		WT under HFD/STD
	Fold Change	q-value	q-value		Fold Change	q-value	q-value
3-ureidopropionate	0.641026	0.0125	0.0101	Abat	1.9477	0.0296	0.0854	KEGG_Gene_Pathway_Compound
3-ureidopropionate	0.641026	0.0125	0.0101	Acadl	1.4826	0.0307	0.9742	KEGG_Gene_Orthology_Reaction_Enzyme_Pathway_Compound
3-ureidopropionate	0.641026	0.0125	0.0101	Acvr2a	1.5726	0.0156	0.148	KEGG_Gene_Orthology_Enzyme_Rclass_Reaction_Module_Pathway_Compound
3-ureidopropionate	0.641026	0.0125	0.0101	Acvr2b	1.9177	0.0348	0.0736	KEGG_Gene_Orthology_Enzyme_Rclass_Reaction_Module_Pathway_Compound
3-ureidopropionate	0.641026	0.0125	0.0101	Aldh3a2	2.3133	0.0418	0.0801	KEGG_Gene_Pathway_Compound
3-ureidopropionate	0.641026	0.0125	0.0101	Asah1	1.3244	0.0469	0.9018	KEGG_Gene_Orthology_Reaction_Rclass_Pathway_Compound
3-ureidopropionate	0.641026	0.0125	0.0101	Auh	1.2136	0.0406	0.1655	KEGG_Gene_Module_Orthology_Pathway_Compound
3-ureidopropionate	0.641026	0.0125	0.0101	BC021891	1.5854	0.0211	0.8839	KEGG_Gene_Orthology_Enzyme_Rclass_Reaction_Module_Pathway_Compound
3-ureidopropionate	0.641026	0.0125	0.0101	Bcat2	1.4962	0.0355	0.301	KEGG_Gene_Orthology_Pathway_Compound
3-ureidopropionate	0.641026	0.0125	0.0101	Bmp4	1.5729	0.0232	0.1876	KEGG_Gene_Module_Orthology_Disease_Drug_Pathway_Compound
3-ureidopropionate	0.641026	0.0125	0.0101	Camk2d	0.754603	0.0156	0.418	KEGG_Gene_Orthology_Enzyme_Rclass_Reaction_Module_Pathway_Compound
3-ureidopropionate	0.641026	0.0125	0.0101	Cdk4	1.1434	0.0408	0.2219	KEGG_Gene_Orthology_Enzyme_Rclass_Reaction_Module_Pathway_Compound
3-ureidopropionate	0.641026	0.0125	0.0101	Ch25h	0.503145	0.039	0.3242	KEGG_Gene_Pathway_Module_Reaction_Rclass_Enzyme_Compound
3-ureidopropionate	0.641026	0.0125	0.0101	Chd3	1.5894	0.0307	0.6073	KEGG_Gene_Orthology_Enzyme_Rclass_Reaction_Module_Pathway_Compound
3-ureidopropionate	0.641026	0.0125	0.0101	Chd6	1.299	0.0359	0.1213	KEGG_Gene_Orthology_Enzyme_Rclass_Reaction_Module_Pathway_Compound
3-ureidopropionate	0.641026	0.0125	0.0101	Chd8	1.4224	0.0262	0.2216	KEGG_Gene_Orthology_Enzyme_Rclass_Reaction_Module_Pathway_Compound
3-ureidopropionate	0.641026	0.0125	0.0101	Clk4	1.3324	0.0336	0.9482	KEGG_Gene_Orthology_Enzyme_Rclass_Reaction_Module_Pathway_Compound
3-ureidopropionate	0.641026	0.0125	0.0101	Cox15	0.735943	0.0382	0.1872	KEGG_Gene_Orthology_Pathway_Module_Reaction_Rclass_Enzyme_Compound
3-ureidopropionate	0.641026	0.0125	0.0101	Dctpp1	1.2295	0.0478	0.472	KEGG_Gene_Pathway_Compound
3-ureidopropionate	0.641026	0.0125	0.0101	Ddx5	0.832362	0.0368	0.8911	KEGG_Gene_Orthology_Enzyme_Rclass_Reaction_Module_Pathway_Compound
3-ureidopropionate	0.641026	0.0125	0.0101	Dgkd	1.2826	0.0197	0.9148	KEGG_Gene_Orthology_Reaction_Rclass_Pathway_Compound
3-ureidopropionate	0.641026	0.0125	0.0101	Dna2	1.4474	0.035	0.0583	KEGG_Gene_Orthology_Disease_Pathway_Compound
3-ureidopropionate	0.641026	0.0125	0.0101	Ephb4	1.3326	0.0464	0.1118	KEGG_Gene_Orthology_Enzyme_Rclass_Reaction_Module_Pathway_Compound
3-ureidopropionate	0.641026	0.0125	0.0101	Erbb3	1.604	0.0445	0.6908	KEGG_Gene_Orthology_Enzyme_Rclass_Reaction_Module_Pathway_Compound
3-ureidopropionate	0.641026	0.0125	0.0101	Gapdh	0.780762	0.0368	0.1171	KEGG_Gene_Module_Reaction_Rclass_Pathway_Compound
3-ureidopropionate	0.641026	0.0125	0.0101	Gne	1.5292	0.0353	0.9279	KEGG_Gene_Orthology_Reaction_Rclass_Pathway_Compound
3-ureidopropionate	0.641026	0.0125	0.0101	Gpx7	1.4809	0.0485	0.9512	KEGG_Gene_Pathway_Module_Reaction_Rclass_Enzyme_Compound
3-ureidopropionate	0.641026	0.0125	0.0101	Hmox2	1.2708	0.046	0.7123	KEGG_Gene_Orthology_Pathway_Module_Reaction_Rclass_Enzyme_Compound
3-ureidopropionate	0.641026	0.0125	0.0101	Impdh2	1.2673	0.043	0.3311	KEGG_Gene_Module_Orthology_Pathway_Compound
3-ureidopropionate	0.641026	0.0125	0.0101	Itpkb	0.771605	0.039	0.1448	KEGG_Gene_Orthology_Reaction_Rclass_Pathway_Compound
3-ureidopropionate	0.641026	0.0125	0.0101	Jph3	0.469087	0.0459	0.2824	KEGG_Gene_Orthology_Disease_Pathway_Compound
3-ureidopropionate	0.641026	0.0125	0.0101	Jph4	0.717772	0.0321	0.5098	KEGG_Gene_Orthology_Disease_Pathway_Compound
3-ureidopropionate	0.641026	0.0125	0.0101	Kat7	1.1336	0.0447	0.9408	KEGG_Gene_Orthology_Enzyme_Rclass_Reaction_Module_Compound
3-ureidopropionate	0.641026	0.0125	0.0101	Man2a1	0.710126	0.039	0.3044	KEGG_Gene_Module_Glycan_Pathway_Compound
3-ureidopropionate	0.641026	0.0125	0.0101	Map3k5	1.6788	0.0102	0.3968	KEGG_Gene_Orthology_Enzyme_Rclass_Reaction_Module_Pathway_Compound
3-ureidopropionate	0.641026	0.0125	0.0101	Map3k7	0.723327	0.0102	0.9913	KEGG_Gene_Orthology_Enzyme_Rclass_Reaction_Module_Pathway_Compound
3-ureidopropionate	0.641026	0.0125	0.0101	Map3k7	0.78456	0.0397	0.9724	KEGG_Gene_Orthology_Enzyme_Rclass_Reaction_Module_Pathway_Compound
3-ureidopropionate	0.641026	0.0125	0.0101	Mapk12	1.2722	0.0337	0.278	KEGG_Gene_Orthology_Enzyme_Rclass_Reaction_Module_Pathway_Compound
3-ureidopropionate	0.641026	0.0125	0.0101	Mob1b	0.75884	0.043	0.8034	KEGG_Gene_Module_Orthology_Disease_Drug_Pathway_Compound
3-ureidopropionate	0.641026	0.0125	0.0101	ND4L	0.854628	0.043	0.0871	KEGG_Gene_Orthology_Enzyme_Rclass_Reaction_Module_Compound
3-ureidopropionate	0.641026	0.0125	0.0101	Nmrk1	1.8514	0.0339	0.503	KEGG_Gene_Orthology_Reaction_Rclass_Pathway_Compound
3-ureidopropionate	0.641026	0.0125	0.0101	Oxct2b	1.8468	0.034	0.3831	KEGG_Gene_Orthology_Reaction_Rclass_Pathway_Compound
3-ureidopropionate	0.641026	0.0125	0.0101	Pcca	0.751145	0.0186	0.0946	KEGG_Gene_Orthology_Reaction_Rclass_Pathway_Compound
3-ureidopropionate	0.641026	0.0125	0.0101	Pigq	0.769408	0.049	0.4129	KEGG_Gene_Orthology_Reaction_Module_Glycan_Pathway_Compound
3-ureidopropionate	0.641026	0.0125	0.0101	Pkm	0.757461	0.0495	0.5381	KEGG_Gene_Module_Orthology_Pathway_Compound
3-ureidopropionate	0.641026	0.0125	0.0101	Ppox	0.727114	0.0245	0.8952	KEGG_Gene_Orthology_Module_Pathway_Rclass_Reaction_Compound
3-ureidopropionate	0.641026	0.0125	0.0101	Ppt2	1.2631	0.021	0.6905	KEGG_Gene_Orthology_Reaction_Rclass_Pathway_Compound
3-ureidopropionate	0.641026	0.0125	0.0101	Prkacb	1.1614	0.0443	0.8239	KEGG_Gene_Orthology_Enzyme_Rclass_Reaction_Module_Pathway_Compound
3-ureidopropionate	0.641026	0.0125	0.0101	Recql	0.774054	0.0406	0.2065	KEGG_Gene_Orthology_Enzyme_Rclass_Reaction_Module_Pathway_Compound
3-ureidopropionate	0.641026	0.0125	0.0101	Ripk1	1.3021	0.0445	0.4129	KEGG_Gene_Orthology_Enzyme_Rclass_Reaction_Module_Pathway_Compound
3-ureidopropionate	0.641026	0.0125	0.0101	Rpe	0.695314	0.0267	0.997	KEGG_Gene_Module_Pathway_Orthology_Rclass_Reaction_Compound
3-ureidopropionate	0.641026	0.0125	0.0101	Ryk	1.4798	0.0344	0.5986	KEGG_Gene_Orthology_Enzyme_Rclass_Reaction_Module_Pathway_Compound
3-ureidopropionate	0.641026	0.0125	0.0101	Sdha	0.797957	0.041	0.8649	KEGG_Gene_Module_Reaction_Rclass_Pathway_Compound
3-ureidopropionate	0.641026	0.0125	0.0101	Smpd1	0.857927	0.036	0.0713	KEGG_Gene_Orthology_Reaction_Rclass_Pathway_Compound
3-ureidopropionate	0.641026	0.0125	0.0101	Snrk	0.655394	0.0336	0.4981	KEGG_Gene_Orthology_Enzyme_Rclass_Reaction_Module_Pathway_Compound
3-ureidopropionate	0.641026	0.0125	0.0101	Socs2	3.5109	0.0242	0.1557	KEGG_Gene_Module_Orthology_Disease_Drug_Pathway_Compound
3-ureidopropionate	0.641026	0.0125	0.0101	Socs3	2.8446	0.0205	0.1914	KEGG_Gene_Module_Orthology_Disease_Drug_Pathway_Compound
3-ureidopropionate	0.641026	0.0125	0.0101	Taok3	1.3309	0.0475	0.5829	KEGG_Gene_Orthology_Enzyme_Rclass_Reaction_Module_Pathway_Compound
3-ureidopropionate	0.641026	0.0125	0.0101	Tead1	0.733084	0.0207	0.0885	KEGG_Gene_Module_Orthology_Disease_Drug_Pathway_Compound
3-ureidopropionate	0.641026	0.0125	0.0101	Tk1	2.1575	0.0307	0.3896	KEGG_Gene_Pathway_Compound
3-ureidopropionate	0.641026	0.0125	0.0101	Tk1	2.0856	0.039	0.5886	KEGG_Gene_Pathway_Compound
3-ureidopropionate	0.641026	0.0125	0.0101	Tm7sf2	1.6735	0.0393	0.4019	KEGG_Gene_Module_Reaction_Orthology_Disease_Pathway_Compound
3-ureidopropionate	0.641026	0.0125	0.0101	Uck2	1.3276	0.0389	0.3061	KEGG_Gene_Pathway_Compound
3-ureidopropionate	0.641026	0.0125	0.0101	Upb1	1.2865	0.046	0.5348	KEGG_Gene_Orthology_Enzyme_Compound
3-ureidopropionate	0.641026	0.0125	0.0101	Upb1	1.2865	0.046	0.5348	REACTOME_Protein_Complex_Catalysis_BiochemicalReaction_SmallMolecule
3-ureidopropionate	0.641026	0.0125	0.0101	Vcp	0.813736	0.0499	0.7205	KEGG_Gene_Module_Pathway_Disease_Orthology_Rclass_Reaction_Compound
3-ureidopropionate	0.641026	0.0125	0.0101	Vcp	0.752955	0.0232	0.0901	KEGG_Gene_Module_Pathway_Disease_Orthology_Rclass_Reaction_Compound
arginine	1.96	7.93e-06	0.0098	Abat	1.9477	0.0296	0.0854	KEGG_Gene_Orthology_Rclass_Reaction_Compound
arginine	1.96	7.93e-06	0.0098	Abhd12	0.786102	0.046	0.4614	KEGG_Gene_Orthology_Enzyme_Rclass_Reaction_Module_Compound
arginine	1.96	7.93e-06	0.0098	Acadl	1.4826	0.0307	0.9742	KEGG_Gene_Module_Reaction_Rclass_Enzyme_Compound
arginine	1.96	7.93e-06	0.0098	Acvr2a	1.5726	0.0156	0.148	KEGG_Gene_Orthology_Enzyme_Rclass_Reaction_Compound
arginine	1.96	7.93e-06	0.0098	Acvr2b	1.9177	0.0348	0.0736	KEGG_Gene_Orthology_Enzyme_Rclass_Reaction_Compound
arginine	1.96	7.93e-06	0.0098	Aldh3a2	2.3133	0.0418	0.0801	KEGG_Gene_Pathway_Compound
arginine	1.96	7.93e-06	0.0098	Arpc5	0.86783	0.0442	0.3748	KEGG_Gene_Orthology_Pathway_Compound
arginine	1.96	7.93e-06	0.0098	Asah1	1.3244	0.0469	0.9018	KEGG_Gene_Orthology_Rclass_Reaction_Compound
arginine	1.96	7.93e-06	0.0098	Auh	1.2136	0.0406	0.1655	KEGG_Gene_Module_Reaction_Rclass_Enzyme_Compound
arginine	1.96	7.93e-06	0.0098	BC021891	1.5854	0.0211	0.8839	KEGG_Gene_Orthology_Enzyme_Rclass_Reaction_Compound
arginine	1.96	7.93e-06	0.0098	Bcat2	1.4962	0.0355	0.301	KEGG_Gene_Orthology_Rclass_Reaction_Compound
arginine	1.96	7.93e-06	0.0098	Bmp4	1.5729	0.0232	0.1876	KEGG_Gene_Module_Orthology_Enzyme_Rclass_Reaction_Compound
arginine	1.96	7.93e-06	0.0098	Bnip3	1.4721	0.0319	0.4012	KEGG_Gene_Pathway_Module_Orthology_Reaction_Rclass_Enzyme_Compound
arginine	1.96	7.93e-06	0.0098	Camk2d	0.754603	0.0156	0.418	KEGG_Gene_Orthology_Enzyme_Rclass_Reaction_Compound
arginine	1.96	7.93e-06	0.0098	Ccs	1.2835	0.0368	0.7201	KEGG_Gene_Orthology_Pathway_Compound
arginine	1.96	7.93e-06	0.0098	Cd247	0.664011	0.0261	0.4955	KEGG_Gene_Orthology_Pathway_Compound
arginine	1.96	7.93e-06	0.0098	Cdc25a	1.3716	0.0346	0.5981	KEGG_Gene_Module_Orthology_Enzyme_Rclass_Reaction_Compound
arginine	1.96	7.93e-06	0.0098	Cdk4	1.1434	0.0408	0.2219	KEGG_Gene_Orthology_Enzyme_Rclass_Reaction_Compound
arginine	1.96	7.93e-06	0.0098	Cdkn1b	1.3841	0.0129	0.0577	KEGG_Gene_Pathway_Module_Orthology_Reaction_Rclass_Enzyme_Compound
arginine	1.96	7.93e-06	0.0098	Ch25h	0.503145	0.039	0.3242	KEGG_Gene_Pathway_Module_Reaction_Rclass_Enzyme_Compound
arginine	1.96	7.93e-06	0.0098	Chd3	1.5894	0.0307	0.6073	KEGG_Gene_Orthology_Enzyme_Rclass_Reaction_Compound
arginine	1.96	7.93e-06	0.0098	Chd6	1.299	0.0359	0.1213	KEGG_Gene_Orthology_Enzyme_Rclass_Reaction_Compound
arginine	1.96	7.93e-06	0.0098	Chd8	1.4224	0.0262	0.2216	KEGG_Gene_Orthology_Enzyme_Rclass_Reaction_Compound
arginine	1.96	7.93e-06	0.0098	Clk4	1.3324	0.0336	0.9482	KEGG_Gene_Orthology_Enzyme_Rclass_Reaction_Compound
arginine	1.96	7.93e-06	0.0098	Cln6	0.752842	0.028	0.1095	KEGG_Gene_Orthology_Disease_Pathway_Compound
arginine	1.96	7.93e-06	0.0098	Cox15	0.735943	0.0382	0.1872	KEGG_Gene_Module_Pathway_Enzyme_Rclass_Reaction_Compound
arginine	1.96	7.93e-06	0.0098	Ctnna1	1.2646	0.0314	0.7057	REACTOME_Protein_Complex_BiochemicalReaction_Pathway_BiochemicalReaction_SmallMolecule
arginine	1.96	7.93e-06	0.0098	Dctpp1	1.2295	0.0478	0.472	KEGG_Gene_Orthology_Rclass_Reaction_Compound
arginine	1.96	7.93e-06	0.0098	Ddx5	0.832362	0.0368	0.8911	KEGG_Gene_Orthology_Enzyme_Rclass_Reaction_Compound
arginine	1.96	7.93e-06	0.0098	Dgkd	1.2826	0.0197	0.9148	KEGG_Gene_Orthology_Rclass_Reaction_Compound
arginine	1.96	7.93e-06	0.0098	Dna2	1.4474	0.035	0.0583	KEGG_Gene_Orthology_Enzyme_Rclass_Reaction_Compound
arginine	1.96	7.93e-06	0.0098	E2f1	0.53582	0.0441	0.0529	KEGG_Gene_Module_Orthology_Enzyme_Rclass_Reaction_Compound
arginine	1.96	7.93e-06	0.0098	Ephb4	1.3326	0.0464	0.1118	KEGG_Gene_Orthology_Enzyme_Rclass_Reaction_Compound
arginine	1.96	7.93e-06	0.0098	Erbb3	1.604	0.0445	0.6908	KEGG_Gene_Orthology_Enzyme_Rclass_Reaction_Compound
arginine	1.96	7.93e-06	0.0098	Fmo3	13.6028	0.0295	0.051	KEGG_Gene_Orthology_Reaction_Rclass_Enzyme_Pathway_Module_Compound
arginine	1.96	7.93e-06	0.0098	Ganc	1.3334	0.0389	0.6072	KEGG_Gene_Orthology_Reaction_Rclass_Pathway_Module_Compound
arginine	1.96	7.93e-06	0.0098	Gapdh	0.780762	0.0368	0.1171	KEGG_Gene_Pathway_Module_Compound
arginine	1.96	7.93e-06	0.0098	Gemin7	0.857265	0.0442	0.8207	KEGG_Gene_Module_Orthology_Enzyme_Rclass_Reaction_Compound
arginine	1.96	7.93e-06	0.0098	Gm5803	1.4858	0.0156	0.1967	KEGG_Gene_Orthology_Disease_Pathway_Compound
arginine	1.96	7.93e-06	0.0098	Gna14	0.796369	0.0319	0.4373	KEGG_Gene_Orthology_Pathway_Compound
arginine	1.96	7.93e-06	0.0098	Gne	1.5292	0.0353	0.9279	KEGG_Gene_Orthology_Rclass_Reaction_Compound
arginine	1.96	7.93e-06	0.0098	Gpx7	1.4809	0.0485	0.9512	KEGG_Gene_Pathway_Module_Reaction_Rclass_Enzyme_Compound
arginine	1.96	7.93e-06	0.0098	Hmox2	1.2708	0.046	0.7123	KEGG_Gene_Orthology_Pathway_Module_Reaction_Rclass_Enzyme_Compound
arginine	1.96	7.93e-06	0.0098	Hnrnpa1	1.5995	0.013	0.0802	KEGG_Gene_Orthology_Disease_Pathway_Compound
arginine	1.96	7.93e-06	0.0098	Hnrnpa1	1.3477	0.033	0.3982	KEGG_Gene_Orthology_Disease_Pathway_Compound
arginine	1.96	7.93e-06	0.0098	Hsd3b2	1.258	0.0363	0.3933	KEGG_Gene_Module_Reaction_Rclass_Enzyme_Compound
arginine	1.96	7.93e-06	0.0098	Ifnar2	1.3541	0.039	0.42	KEGG_Gene_Pathway_Module_Orthology_Reaction_Rclass_Enzyme_Compound
arginine	1.96	7.93e-06	0.0098	Ifnar2	1.2875	0.0252	0.6653	KEGG_Gene_Pathway_Module_Orthology_Reaction_Rclass_Enzyme_Compound
arginine	1.96	7.93e-06	0.0098	Il1r1	1.8383	0.0146	0.0516	KEGG_Gene_Orthology_Pathway_Compound
arginine	1.96	7.93e-06	0.0098	Il6ra	1.9399	0.0237	0.4462	KEGG_Gene_Pathway_Module_Orthology_Reaction_Rclass_Enzyme_Compound
arginine	1.96	7.93e-06	0.0098	Impdh2	1.2673	0.043	0.3311	KEGG_Gene_Module_Orthology_Pathway_Compound
arginine	1.96	7.93e-06	0.0098	Itpkb	0.771605	0.039	0.1448	KEGG_Gene_Orthology_Rclass_Reaction_Compound
arginine	1.96	7.93e-06	0.0098	Kat7	1.1336	0.0447	0.9408	KEGG_Gene_Orthology_Enzyme_Rclass_Reaction_Compound
arginine	1.96	7.93e-06	0.0098	Krt81	0.483933	0.0148	0.052	KEGG_Gene_Orthology_Disease_Drug_Pathway_Compound
arginine	1.96	7.93e-06	0.0098	Lipe	1.3837	0.0394	0.2037	KEGG_Gene_Orthology_Enzyme_Rclass_Reaction_Module_Compound
arginine	1.96	7.93e-06	0.0098	Lpar2	0.657289	0.0211	0.7263	KEGG_Gene_Pathway_Module_Orthology_Reaction_Rclass_Enzyme_Compound
arginine	1.96	7.93e-06	0.0098	Lpar6	1.3965	0.0153	0.1506	KEGG_Gene_Pathway_Module_Orthology_Reaction_Rclass_Enzyme_Compound
arginine	1.96	7.93e-06	0.0098	Man2a1	0.710126	0.039	0.3044	KEGG_Gene_Module_Glycan_Pathway_Compound
arginine	1.96	7.93e-06	0.0098	Map3k5	1.6788	0.0102	0.3968	KEGG_Gene_Orthology_Pathway_Compound
arginine	1.96	7.93e-06	0.0098	Map3k7	0.723327	0.0102	0.9913	KEGG_Gene_Orthology_Enzyme_Rclass_Reaction_Compound
arginine	1.96	7.93e-06	0.0098	Map3k7	0.78456	0.0397	0.9724	KEGG_Gene_Orthology_Enzyme_Rclass_Reaction_Compound
arginine	1.96	7.93e-06	0.0098	Mapk12	1.2722	0.0337	0.278	KEGG_Gene_Orthology_Pathway_Compound
arginine	1.96	7.93e-06	0.0098	Matr3	1.1305	0.04	0.7147	KEGG_Gene_Orthology_Disease_Pathway_Compound
arginine	1.96	7.93e-06	0.0098	Mcl1	1.2182	0.0397	0.3974	KEGG_Gene_Pathway_Module_Orthology_Reaction_Rclass_Enzyme_Compound
arginine	1.96	7.93e-06	0.0098	Mob1b	0.75884	0.043	0.8034	KEGG_Gene_Module_Orthology_Enzyme_Rclass_Reaction_Compound
arginine	1.96	7.93e-06	0.0098	Nagpa	0.733999	0.0353	0.5616	KEGG_Gene_Orthology_Enzyme_Rclass_Reaction_Module_Pathway_Compound
arginine	1.96	7.93e-06	0.0098	Ncstn	1.1966	0.039	0.9933	KEGG_Gene_Module_Orthology_Disease_Drug_Pathway_Compound
arginine	1.96	7.93e-06	0.0098	ND4L	0.854628	0.043	0.0871	KEGG_Gene_Orthology_Enzyme_Rclass_Reaction_Compound
arginine	1.96	7.93e-06	0.0098	Ndufv3	0.765462	0.0408	0.3008	KEGG_Gene_Module_Orthology_Enzyme_Rclass_Reaction_Compound
arginine	1.96	7.93e-06	0.0098	Nmrk1	1.8514	0.0339	0.503	KEGG_Gene_Orthology_Rclass_Reaction_Compound
arginine	1.96	7.93e-06	0.0098	Notum	1.5258	0.0368	0.1187	KEGG_Gene_Orthology_Enzyme_Rclass_Reaction_Module_Compound
arginine	1.96	7.93e-06	0.0098	Npm1	1.2708	0.0454	0.2613	KEGG_Gene_Orthology_Disease_Drug_Pathway_Rclass_Reaction_Compound
arginine	1.96	7.93e-06	0.0098	Nup54	0.610911	0.0269	0.6428	KEGG_Gene_Module_Pathway_Disease_Orthology_Rclass_Reaction_Compound
arginine	1.96	7.93e-06	0.0098	Oxct2b	1.8468	0.034	0.3831	KEGG_Gene_Orthology_Reaction_Rclass_Pathway_Module_Compound
arginine	1.96	7.93e-06	0.0098	Papd7	1.3682	0.0307	0.9527	KEGG_Gene_Module_Orthology_Enzyme_Rclass_Reaction_Compound
arginine	1.96	7.93e-06	0.0098	Pcca	0.751145	0.0186	0.0946	KEGG_Gene_Orthology_Reaction_Rclass_Enzyme_Compound
arginine	1.96	7.93e-06	0.0098	Pigq	0.769408	0.049	0.4129	KEGG_Gene_Pathway_Module_Reaction_Rclass_Enzyme_Compound
arginine	1.96	7.93e-06	0.0098	Pkm	0.757461	0.0495	0.5381	KEGG_Gene_Orthology_Pathway_Compound
arginine	1.96	7.93e-06	0.0098	Pla2g16	7.7958	0.0329	0.0588	KEGG_Gene_Orthology_Enzyme_Rclass_Reaction_Module_Compound
arginine	1.96	7.93e-06	0.0098	Ppox	0.727114	0.0245	0.8952	KEGG_Gene_Orthology_Module_Reaction_Pathway_Compound
arginine	1.96	7.93e-06	0.0098	Ppt2	1.2631	0.021	0.6905	KEGG_Gene_Orthology_Rclass_Reaction_Compound
arginine	1.96	7.93e-06	0.0098	Prickle1	1.4737	0.0308	0.2111	KEGG_Gene_Orthology_Disease_Pathway_Compound
arginine	1.96	7.93e-06	0.0098	Prkacb	1.1614	0.0443	0.8239	KEGG_Gene_Orthology_Pathway_Compound
arginine	1.96	7.93e-06	0.0098	Rbl2	1.4364	0.046	0.3755	KEGG_Gene_Pathway_Module_Orthology_Reaction_Rclass_Enzyme_Compound
arginine	1.96	7.93e-06	0.0098	Recql	0.774054	0.0406	0.2065	KEGG_Gene_Orthology_Enzyme_Rclass_Reaction_Compound
arginine	1.96	7.93e-06	0.0098	Rictor	1.4845	0.0197	0.0545	REACTOME_Protein_Complex_Catalysis_PathwayStep_Pathway_BiochemicalReaction_SmallMolecule
arginine	1.96	7.93e-06	0.0098	Rictor	2.458	0.0102	0.0572	REACTOME_Protein_Complex_Catalysis_PathwayStep_Pathway_BiochemicalReaction_SmallMolecule
arginine	1.96	7.93e-06	0.0098	Ripk1	1.3021	0.0445	0.4129	KEGG_Gene_Orthology_Enzyme_Rclass_Reaction_Compound
arginine	1.96	7.93e-06	0.0098	Rpe	0.695314	0.0267	0.997	KEGG_Gene_Pathway_Module_Compound
arginine	1.96	7.93e-06	0.0098	Ryk	1.4798	0.0344	0.5986	KEGG_Gene_Orthology_Enzyme_Rclass_Reaction_Compound
arginine	1.96	7.93e-06	0.0098	Sart1	0.722543	0.0412	0.7687	KEGG_Gene_Module_Orthology_Enzyme_Rclass_Reaction_Compound
arginine	1.96	7.93e-06	0.0098	Sdha	0.797957	0.041	0.8649	KEGG_Gene_Module_Orthology_Rclass_Reaction_Compound
arginine	1.96	7.93e-06	0.0098	Setd1b	1.6229	0.0153	0.0695	KEGG_Gene_Orthology_Rclass_Reaction_Module_Compound
arginine	1.96	7.93e-06	0.0098	Sirt1	1.3252	0.032	0.0596	KEGG_Gene_Pathway_Module_Orthology_Reaction_Rclass_Enzyme_Compound
arginine	1.96	7.93e-06	0.0098	Smpd1	0.857927	0.036	0.0713	KEGG_Gene_Orthology_Reaction_Rclass_Enzyme_Pathway_Compound
arginine	1.96	7.93e-06	0.0098	Snrk	0.655394	0.0336	0.4981	KEGG_Gene_Orthology_Enzyme_Rclass_Reaction_Compound
arginine	1.96	7.93e-06	0.0098	Socs2	3.5109	0.0242	0.1557	KEGG_Gene_Module_Orthology_Enzyme_Rclass_Reaction_Compound
arginine	1.96	7.93e-06	0.0098	Socs3	2.8446	0.0205	0.1914	KEGG_Gene_Module_Orthology_Enzyme_Rclass_Reaction_Compound
arginine	1.96	7.93e-06	0.0098	Ss18	1.1306	0.035	0.3391	KEGG_Gene_Orthology_Disease_Drug_Pathway_Rclass_Reaction_Compound
arginine	1.96	7.93e-06	0.0098	Stam2	0.74195	0.0465	0.3555	KEGG_Gene_Module_Pathway_Orthology_Rclass_Reaction_Compound
arginine	1.96	7.93e-06	0.0098	Suv420h2	0.83654	0.0382	0.1716	KEGG_Gene_Orthology_Rclass_Reaction_Module_Compound
arginine	1.96	7.93e-06	0.0098	Taok3	1.3309	0.0475	0.5829	KEGG_Gene_Orthology_Enzyme_Rclass_Reaction_Compound
arginine	1.96	7.93e-06	0.0098	Tead1	0.733084	0.0207	0.0885	KEGG_Gene_Module_Orthology_Enzyme_Rclass_Reaction_Compound
arginine	1.96	7.93e-06	0.0098	Thoc7	0.629921	0.039	0.7272	KEGG_Gene_Module_Orthology_Enzyme_Rclass_Reaction_Compound
arginine	1.96	7.93e-06	0.0098	Tjp1	1.438	0.036	0.9299	KEGG_Gene_Orthology_Pathway_Compound
arginine	1.96	7.93e-06	0.0098	Tk1	2.1575	0.0307	0.3896	KEGG_Gene_Orthology_Rclass_Reaction_Compound
arginine	1.96	7.93e-06	0.0098	Tk1	2.0856	0.039	0.5886	KEGG_Gene_Orthology_Rclass_Reaction_Compound
arginine	1.96	7.93e-06	0.0098	Tm7sf2	1.6735	0.0393	0.4019	KEGG_Gene_Orthology_Reaction_Pathway_Module_Compound
arginine	1.96	7.93e-06	0.0098	Tuba1c	0.56262	0.046	0.3787	KEGG_Gene_Orthology_Disease_Pathway_Compound
arginine	1.96	7.93e-06	0.0098	Tuba3a	0.492174	0.0439	0.4178	KEGG_Gene_Orthology_Disease_Pathway_Compound
arginine	1.96	7.93e-06	0.0098	Uck2	1.3276	0.0389	0.3061	KEGG_Gene_Orthology_Rclass_Reaction_Compound
arginine	1.96	7.93e-06	0.0098	Upb1	1.2865	0.046	0.5348	KEGG_Gene_Orthology_Rclass_Reaction_Module_Compound
arginine	1.96	7.93e-06	0.0098	Vcp	0.752955	0.0232	0.0901	KEGG_Gene_Module_Orthology_Pathway_Compound
arginine	1.96	7.93e-06	0.0098	Vcp	0.813736	0.0499	0.7205	KEGG_Gene_Module_Orthology_Pathway_Compound
arginine	1.96	7.93e-06	0.0098	Vegfa	1.4372	0.0261	0.2147	KEGG_Gene_Pathway_Module_Orthology_Reaction_Rclass_Enzyme_Compound
arginine	1.96	7.93e-06	0.0098	Vps28	1.2296	0.0443	0.0617	KEGG_Gene_Module_Pathway_Disease_Orthology_Rclass_Reaction_Compound
arginine	1.96	7.93e-06	0.0098	Vps37d	0.395789	0.0214	0.992	KEGG_Gene_Module_Pathway_Disease_Orthology_Rclass_Reaction_Compound
cholate	2.29	0.0226	0.0125	Abat	1.9477	0.0296	0.0854	KEGG_Gene_Pathway_Module_Orthology_Rclass_Reaction_Compound
cholate	2.29	0.0226	0.0125	Acadl	1.4826	0.0307	0.9742	KEGG_Gene_Module_Reaction_Rclass_Enzyme_Compound
cholate	2.29	0.0226	0.0125	Acvr2a	1.5726	0.0156	0.148	KEGG_Gene_Module_Pathway_Disease_Orthology_Rclass_Reaction_Compound
cholate	2.29	0.0226	0.0125	Acvr2b	1.9177	0.0348	0.0736	KEGG_Gene_Module_Pathway_Disease_Orthology_Rclass_Reaction_Compound
cholate	2.29	0.0226	0.0125	Aldh3a2	2.3133	0.0418	0.0801	KEGG_Gene_Orthology_Reaction_Rclass_Pathway_Compound
cholate	2.29	0.0226	0.0125	Asah1	1.3244	0.0469	0.9018	KEGG_Gene_Module_Reaction_Rclass_Enzyme_Compound
cholate	2.29	0.0226	0.0125	Auh	1.2136	0.0406	0.1655	KEGG_Gene_Module_Reaction_Rclass_Enzyme_Compound
cholate	2.29	0.0226	0.0125	BC021891	1.5854	0.0211	0.8839	KEGG_Gene_Module_Pathway_Disease_Orthology_Rclass_Reaction_Compound
cholate	2.29	0.0226	0.0125	Bcat2	1.4962	0.0355	0.301	KEGG_Gene_Module_Reaction_Rclass_Enzyme_Compound
cholate	2.29	0.0226	0.0125	Bmp4	1.5729	0.0232	0.1876	KEGG_Gene_Module_Pathway_Disease_Orthology_Rclass_Reaction_Compound
cholate	2.29	0.0226	0.0125	Ch25h	0.503145	0.039	0.3242	KEGG_Gene_Orthology_Pathway_Compound
cholate	2.29	0.0226	0.0125	Cox15	0.735943	0.0382	0.1872	KEGG_Gene_Module_Pathway_Enzyme_Rclass_Reaction_Compound
cholate	2.29	0.0226	0.0125	Dctpp1	1.2295	0.0478	0.472	KEGG_Gene_Pathway_Module_Reaction_Rclass_Enzyme_Compound
cholate	2.29	0.0226	0.0125	Dgkd	1.2826	0.0197	0.9148	KEGG_Gene_Pathway_Module_Reaction_Rclass_Enzyme_Compound
cholate	2.29	0.0226	0.0125	Gapdh	0.780762	0.0368	0.1171	KEGG_Gene_Module_Reaction_Rclass_Pathway_Compound
cholate	2.29	0.0226	0.0125	Gpx7	1.4809	0.0485	0.9512	KEGG_Gene_Pathway_Module_Reaction_Rclass_Enzyme_Compound
cholate	2.29	0.0226	0.0125	Hmox2	1.2708	0.046	0.7123	KEGG_Gene_Orthology_Pathway_Module_Reaction_Rclass_Enzyme_Compound
cholate	2.29	0.0226	0.0125	Hsd3b2	1.258	0.0363	0.3933	KEGG_Gene_Orthology_Enzyme_Rclass_Reaction_Module_Compound
cholate	2.29	0.0226	0.0125	Impdh2	1.2673	0.043	0.3311	KEGG_Gene_Module_Pathway_Orthology_Rclass_Reaction_Compound
cholate	2.29	0.0226	0.0125	Itpkb	0.771605	0.039	0.1448	KEGG_Gene_Module_Reaction_Rclass_Orthology_Pathway_Disease_Compound
cholate	2.29	0.0226	0.0125	Kat7	1.1336	0.0447	0.9408	KEGG_Gene_Orthology_Enzyme_Rclass_Reaction_Compound
cholate	2.29	0.0226	0.0125	Man2a1	0.710126	0.039	0.3044	KEGG_Gene_Module_Glycan_Pathway_Compound
cholate	2.29	0.0226	0.0125	Map3k5	1.6788	0.0102	0.3968	KEGG_Gene_Module_Pathway_Disease_Orthology_Rclass_Reaction_Compound
cholate	2.29	0.0226	0.0125	Map3k7	0.723327	0.0102	0.9913	KEGG_Gene_Module_Orthology_Disease_Drug_Pathway_Compound
cholate	2.29	0.0226	0.0125	Map3k7	0.78456	0.0397	0.9724	KEGG_Gene_Module_Orthology_Disease_Drug_Pathway_Compound
cholate	2.29	0.0226	0.0125	Mapk12	1.2722	0.0337	0.278	KEGG_Gene_Module_Pathway_Disease_Orthology_Rclass_Reaction_Compound
cholate	2.29	0.0226	0.0125	ND4L	0.854628	0.043	0.0871	KEGG_Gene_Orthology_Enzyme_Rclass_Reaction_Compound
cholate	2.29	0.0226	0.0125	Ndufv3	0.765462	0.0408	0.3008	KEGG_Gene_Module_Orthology_Enzyme_Rclass_Reaction_Compound
cholate	2.29	0.0226	0.0125	Oxct2b	1.8468	0.034	0.3831	KEGG_Gene_Orthology_Rclass_Reaction_Compound
cholate	2.29	0.0226	0.0125	Pcca	0.751145	0.0186	0.0946	KEGG_Gene_Orthology_Module_Reaction_Rclass_Enzyme_Compound
cholate	2.29	0.0226	0.0125	Pigq	0.769408	0.049	0.4129	KEGG_Gene_Pathway_Module_Reaction_Rclass_Enzyme_Compound
cholate	2.29	0.0226	0.0125	Pkm	0.757461	0.0495	0.5381	KEGG_Gene_Module_Reaction_Rclass_Pathway_Compound
cholate	2.29	0.0226	0.0125	Ppox	0.727114	0.0245	0.8952	KEGG_Gene_Orthology_Module_Pathway_Rclass_Reaction_Compound
cholate	2.29	0.0226	0.0125	Ppt2	1.2631	0.021	0.6905	KEGG_Gene_Orthology_Rclass_Reaction_Compound
cholate	2.29	0.0226	0.0125	Prkacb	1.1614	0.0443	0.8239	KEGG_Gene_Orthology_Pathway_Compound
cholate	2.29	0.0226	0.0125	Rpe	0.695314	0.0267	0.997	KEGG_Gene_Module_Orthology_Rclass_Reaction_Compound
cholate	2.29	0.0226	0.0125	Sart1	0.722543	0.0412	0.7687	KEGG_Gene_Module_Pathway_Disease_Orthology_Rclass_Reaction_Compound
cholate	2.29	0.0226	0.0125	Sdha	0.797957	0.041	0.8649	KEGG_Gene_Module_Orthology_Rclass_Reaction_Compound
cholate	2.29	0.0226	0.0125	Setd1b	1.6229	0.0153	0.0695	KEGG_Gene_Pathway_Module_Reaction_Rclass_Enzyme_Compound
cholate	2.29	0.0226	0.0125	Smpd1	0.857927	0.036	0.0713	KEGG_Gene_Pathway_Module_Reaction_Rclass_Enzyme_Compound
cholate	2.29	0.0226	0.0125	Stam2	0.74195	0.0465	0.3555	KEGG_Gene_Module_Pathway_Disease_Orthology_Rclass_Reaction_Compound
cholate	2.29	0.0226	0.0125	Suv420h2	0.83654	0.0382	0.1716	KEGG_Gene_Pathway_Module_Reaction_Rclass_Enzyme_Compound
cholate	2.29	0.0226	0.0125	Taok3	1.3309	0.0475	0.5829	KEGG_Gene_Module_Pathway_Disease_Orthology_Rclass_Reaction_Compound
cholate	2.29	0.0226	0.0125	Thoc7	0.629921	0.039	0.7272	KEGG_Gene_Module_Pathway_Disease_Orthology_Rclass_Reaction_Compound
cholate	2.29	0.0226	0.0125	Tk1	2.1575	0.0307	0.3896	KEGG_Gene_Pathway_Module_Reaction_Rclass_Enzyme_Compound
cholate	2.29	0.0226	0.0125	Tk1	2.0856	0.039	0.5886	KEGG_Gene_Pathway_Module_Reaction_Rclass_Enzyme_Compound
cholate	2.29	0.0226	0.0125	Tm7sf2	1.6735	0.0393	0.4019	KEGG_Gene_Module_Reaction_Rclass_Enzyme_Compound
cholate	2.29	0.0226	0.0125	Uck2	1.3276	0.0389	0.3061	KEGG_Gene_Pathway_Module_Reaction_Rclass_Enzyme_Compound
cholate	2.29	0.0226	0.0125	Upb1	1.2865	0.046	0.5348	KEGG_Gene_Orthology_Rclass_Reaction_Compound
cholate	2.29	0.0226	0.0125	Vps28	1.2296	0.0443	0.0617	KEGG_Gene_Module_Pathway_Disease_Orthology_Rclass_Reaction_Compound
cholate	2.29	0.0226	0.0125	Vps37d	0.395789	0.0214	0.992	KEGG_Gene_Module_Pathway_Disease_Orthology_Rclass_Reaction_Compound
cytosine	3.28	0.0002	0.0006	Abat	1.9477	0.0296	0.0854	KEGG_Gene_Orthology_Rclass_Reaction_Module_Pathway_Enzyme_Compound
cytosine	3.28	0.0002	0.0006	Acadl	1.4826	0.0307	0.9742	KEGG_Gene_Module_Pathway_Enzyme_Rclass_Reaction_Compound
cytosine	3.28	0.0002	0.0006	Acvr2a	1.5726	0.0156	0.148	KEGG_Gene_Orthology_Enzyme_Rclass_Reaction_Module_Pathway_Compound
cytosine	3.28	0.0002	0.0006	Acvr2b	1.9177	0.0348	0.0736	KEGG_Gene_Orthology_Enzyme_Rclass_Reaction_Module_Pathway_Compound
cytosine	3.28	0.0002	0.0006	Aldh3a2	2.3133	0.0418	0.0801	KEGG_Gene_Module_Pathway_Enzyme_Compound
cytosine	3.28	0.0002	0.0006	Asah1	1.3244	0.0469	0.9018	KEGG_Gene_Orthology_Reaction_Rclass_Enzyme_Pathway_Compound
cytosine	3.28	0.0002	0.0006	Auh	1.2136	0.0406	0.1655	KEGG_Gene_Module_Reaction_Rclass_Pathway_Compound
cytosine	3.28	0.0002	0.0006	BC021891	1.5854	0.0211	0.8839	KEGG_Gene_Orthology_Enzyme_Rclass_Reaction_Module_Pathway_Compound
cytosine	3.28	0.0002	0.0006	Bcat2	1.4962	0.0355	0.301	KEGG_Gene_Module_Reaction_Rclass_Pathway_Compound
cytosine	3.28	0.0002	0.0006	Bmp4	1.5729	0.0232	0.1876	KEGG_Gene_Module_Orthology_Disease_Drug_Pathway_Compound
cytosine	3.28	0.0002	0.0006	Camk2d	0.754603	0.0156	0.418	KEGG_Gene_Orthology_Enzyme_Rclass_Reaction_Module_Pathway_Compound
cytosine	3.28	0.0002	0.0006	Cdk4	1.1434	0.0408	0.2219	KEGG_Gene_Orthology_Enzyme_Rclass_Reaction_Module_Pathway_Compound
cytosine	3.28	0.0002	0.0006	Chd3	1.5894	0.0307	0.6073	KEGG_Gene_Orthology_Enzyme_Rclass_Reaction_Module_Pathway_Compound
cytosine	3.28	0.0002	0.0006	Chd6	1.299	0.0359	0.1213	KEGG_Gene_Orthology_Enzyme_Rclass_Reaction_Module_Pathway_Compound
cytosine	3.28	0.0002	0.0006	Chd8	1.4224	0.0262	0.2216	KEGG_Gene_Orthology_Enzyme_Rclass_Reaction_Module_Pathway_Compound
cytosine	3.28	0.0002	0.0006	Clk4	1.3324	0.0336	0.9482	KEGG_Gene_Orthology_Enzyme_Rclass_Reaction_Module_Pathway_Compound
cytosine	3.28	0.0002	0.0006	Cox15	0.735943	0.0382	0.1872	KEGG_Gene_Orthology_Pathway_Module_Reaction_Rclass_Enzyme_Compound
cytosine	3.28	0.0002	0.0006	Dctpp1	1.2295	0.0478	0.472	KEGG_Gene_Orthology_Pathway_Compound
cytosine	3.28	0.0002	0.0006	Ddx5	0.832362	0.0368	0.8911	KEGG_Gene_Orthology_Enzyme_Rclass_Reaction_Module_Pathway_Compound
cytosine	3.28	0.0002	0.0006	Dgkd	1.2826	0.0197	0.9148	KEGG_Gene_Orthology_Reaction_Rclass_Pathway_Compound
cytosine	3.28	0.0002	0.0006	Dna2	1.4474	0.035	0.0583	KEGG_Gene_Orthology_Disease_Pathway_Compound
cytosine	3.28	0.0002	0.0006	Ephb4	1.3326	0.0464	0.1118	KEGG_Gene_Orthology_Enzyme_Rclass_Reaction_Module_Pathway_Compound
cytosine	3.28	0.0002	0.0006	Erbb3	1.604	0.0445	0.6908	KEGG_Gene_Orthology_Enzyme_Rclass_Reaction_Module_Pathway_Compound
cytosine	3.28	0.0002	0.0006	Gapdh	0.780762	0.0368	0.1171	KEGG_Gene_Module_Reaction_Rclass_Pathway_Compound
cytosine	3.28	0.0002	0.0006	Gne	1.5292	0.0353	0.9279	KEGG_Gene_Orthology_Reaction_Rclass_Pathway_Compound
cytosine	3.28	0.0002	0.0006	Hmox2	1.2708	0.046	0.7123	KEGG_Gene_Orthology_Pathway_Module_Reaction_Rclass_Enzyme_Compound
cytosine	3.28	0.0002	0.0006	Impdh2	1.2673	0.043	0.3311	KEGG_Gene_Module_Orthology_Pathway_Compound
cytosine	3.28	0.0002	0.0006	Itpkb	0.771605	0.039	0.1448	KEGG_Gene_Orthology_Reaction_Rclass_Pathway_Compound
cytosine	3.28	0.0002	0.0006	Man2a1	0.710126	0.039	0.3044	KEGG_Gene_Module_Glycan_Pathway_Compound
cytosine	3.28	0.0002	0.0006	Map3k5	1.6788	0.0102	0.3968	KEGG_Gene_Orthology_Enzyme_Rclass_Reaction_Module_Pathway_Compound
cytosine	3.28	0.0002	0.0006	Map3k7	0.723327	0.0102	0.9913	KEGG_Gene_Orthology_Enzyme_Rclass_Reaction_Module_Pathway_Compound
cytosine	3.28	0.0002	0.0006	Map3k7	0.78456	0.0397	0.9724	KEGG_Gene_Orthology_Enzyme_Rclass_Reaction_Module_Pathway_Compound
cytosine	3.28	0.0002	0.0006	Mapk12	1.2722	0.0337	0.278	KEGG_Gene_Orthology_Enzyme_Rclass_Reaction_Module_Pathway_Compound
cytosine	3.28	0.0002	0.0006	Mob1b	0.75884	0.043	0.8034	KEGG_Gene_Module_Orthology_Disease_Drug_Pathway_Compound
cytosine	3.28	0.0002	0.0006	ND4L	0.854628	0.043	0.0871	KEGG_Gene_Orthology_Enzyme_Rclass_Reaction_Module_Pathway_Compound
cytosine	3.28	0.0002	0.0006	Nmrk1	1.8514	0.0339	0.503	KEGG_Gene_Orthology_Reaction_Rclass_Pathway_Compound
cytosine	3.28	0.0002	0.0006	Pcca	0.751145	0.0186	0.0946	KEGG_Gene_Orthology_Reaction_Rclass_Pathway_Compound
cytosine	3.28	0.0002	0.0006	Pigq	0.769408	0.049	0.4129	KEGG_Gene_Orthology_Reaction_Module_Glycan_Pathway_Compound
cytosine	3.28	0.0002	0.0006	Pkm	0.757461	0.0495	0.5381	KEGG_Gene_Module_Orthology_Pathway_Compound
cytosine	3.28	0.0002	0.0006	Ppox	0.727114	0.0245	0.8952	KEGG_Gene_Orthology_Module_Pathway_Rclass_Reaction_Compound
cytosine	3.28	0.0002	0.0006	Ppt2	1.2631	0.021	0.6905	KEGG_Gene_Orthology_Rclass_Reaction_Module_Pathway_Enzyme_Compound
cytosine	3.28	0.0002	0.0006	Prkacb	1.1614	0.0443	0.8239	KEGG_Gene_Orthology_Enzyme_Rclass_Reaction_Module_Pathway_Compound
cytosine	3.28	0.0002	0.0006	Recql	0.774054	0.0406	0.2065	KEGG_Gene_Orthology_Enzyme_Rclass_Reaction_Module_Pathway_Compound
cytosine	3.28	0.0002	0.0006	Ripk1	1.3021	0.0445	0.4129	KEGG_Gene_Orthology_Enzyme_Rclass_Reaction_Module_Pathway_Compound
cytosine	3.28	0.0002	0.0006	Rpe	0.695314	0.0267	0.997	KEGG_Gene_Module_Pathway_Orthology_Rclass_Reaction_Compound
cytosine	3.28	0.0002	0.0006	Ryk	1.4798	0.0344	0.5986	KEGG_Gene_Orthology_Enzyme_Rclass_Reaction_Module_Pathway_Compound
cytosine	3.28	0.0002	0.0006	Sdha	0.797957	0.041	0.8649	KEGG_Gene_Module_Reaction_Rclass_Pathway_Compound
cytosine	3.28	0.0002	0.0006	Setd1b	1.6229	0.0153	0.0695	KEGG_Gene_Orthology_Rclass_Reaction_Module_Pathway_Enzyme_Compound
cytosine	3.28	0.0002	0.0006	Smpd1	0.857927	0.036	0.0713	KEGG_Gene_Orthology_Reaction_Rclass_Pathway_Compound
cytosine	3.28	0.0002	0.0006	Snrk	0.655394	0.0336	0.4981	KEGG_Gene_Orthology_Enzyme_Rclass_Reaction_Module_Pathway_Compound
cytosine	3.28	0.0002	0.0006	Socs2	3.5109	0.0242	0.1557	KEGG_Gene_Module_Orthology_Disease_Drug_Pathway_Compound
cytosine	3.28	0.0002	0.0006	Socs3	2.8446	0.0205	0.1914	KEGG_Gene_Module_Orthology_Disease_Drug_Pathway_Compound
cytosine	3.28	0.0002	0.0006	Suv420h2	0.83654	0.0382	0.1716	KEGG_Gene_Orthology_Rclass_Reaction_Module_Pathway_Enzyme_Compound
cytosine	3.28	0.0002	0.0006	Taok3	1.3309	0.0475	0.5829	KEGG_Gene_Orthology_Enzyme_Rclass_Reaction_Module_Pathway_Compound
cytosine	3.28	0.0002	0.0006	Tead1	0.733084	0.0207	0.0885	KEGG_Gene_Module_Orthology_Disease_Drug_Pathway_Compound
cytosine	3.28	0.0002	0.0006	Tk1	2.0856	0.039	0.5886	KEGG_Gene_Orthology_Pathway_Compound
cytosine	3.28	0.0002	0.0006	Tk1	2.1575	0.0307	0.3896	KEGG_Gene_Orthology_Pathway_Compound
cytosine	3.28	0.0002	0.0006	Tm7sf2	1.6735	0.0393	0.4019	KEGG_Gene_Module_Reaction_Orthology_Disease_Pathway_Compound
cytosine	3.28	0.0002	0.0006	Uck2	1.3276	0.0389	0.3061	KEGG_Gene_Orthology_Pathway_Compound
cytosine	3.28	0.0002	0.0006	Upb1	1.2865	0.046	0.5348	KEGG_Gene_Orthology_Pathway_Compound
phenylpyruvate	0.529101	0.0158	0.0186	Abat	1.9477	0.0296	0.0854	KEGG_Gene_Orthology_Rclass_Reaction_Compound
phenylpyruvate	0.529101	0.0158	0.0186	Abhd12	0.786102	0.046	0.4614	KEGG_Gene_Orthology_Enzyme_Rclass_Reaction_Module_Pathway_Compound
phenylpyruvate	0.529101	0.0158	0.0186	Acadl	1.4826	0.0307	0.9742	KEGG_Gene_Module_Orthology_Pathway_Compound
phenylpyruvate	0.529101	0.0158	0.0186	Acvr2a	1.5726	0.0156	0.148	KEGG_Gene_Module_Pathway_Orthology_Rclass_Reaction_Compound
phenylpyruvate	0.529101	0.0158	0.0186	Acvr2b	1.9177	0.0348	0.0736	KEGG_Gene_Module_Pathway_Orthology_Rclass_Reaction_Compound
phenylpyruvate	0.529101	0.0158	0.0186	Aldh3a2	2.3133	0.0418	0.0801	KEGG_Gene_Orthology_Reaction_Enzyme_Pathway_Compound
phenylpyruvate	0.529101	0.0158	0.0186	Asah1	1.3244	0.0469	0.9018	KEGG_Gene_Orthology_Reaction_Rclass_Pathway_Compound
phenylpyruvate	0.529101	0.0158	0.0186	Auh	1.2136	0.0406	0.1655	KEGG_Gene_Module_Pathway_Enzyme_Compound
phenylpyruvate	0.529101	0.0158	0.0186	BC021891	1.5854	0.0211	0.8839	KEGG_Gene_Orthology_Enzyme_Rclass_Reaction_Module_Pathway_Compound
phenylpyruvate	0.529101	0.0158	0.0186	Bcat2	1.4962	0.0355	0.301	KEGG_Gene_Orthology_Rclass_Reaction_Compound
phenylpyruvate	0.529101	0.0158	0.0186	Bmp4	1.5729	0.0232	0.1876	KEGG_Gene_Module_Pathway_Drug_Disease_Orthology_Enzyme_Compound
phenylpyruvate	0.529101	0.0158	0.0186	Camk2d	0.754603	0.0156	0.418	KEGG_Gene_Orthology_Enzyme_Rclass_Reaction_Module_Pathway_Compound
phenylpyruvate	0.529101	0.0158	0.0186	Cdc25a	1.3716	0.0346	0.5981	KEGG_Gene_Module_Pathway_Disease_Orthology_Rclass_Reaction_Compound
phenylpyruvate	0.529101	0.0158	0.0186	Cdk4	1.1434	0.0408	0.2219	KEGG_Gene_Module_Pathway_Orthology_Rclass_Reaction_Compound
phenylpyruvate	0.529101	0.0158	0.0186	Chd3	1.5894	0.0307	0.6073	KEGG_Gene_Orthology_Enzyme_Rclass_Reaction_Module_Pathway_Compound
phenylpyruvate	0.529101	0.0158	0.0186	Chd6	1.299	0.0359	0.1213	KEGG_Gene_Orthology_Enzyme_Rclass_Reaction_Module_Pathway_Compound
phenylpyruvate	0.529101	0.0158	0.0186	Chd8	1.4224	0.0262	0.2216	KEGG_Gene_Orthology_Enzyme_Rclass_Reaction_Module_Pathway_Compound
phenylpyruvate	0.529101	0.0158	0.0186	Clk4	1.3324	0.0336	0.9482	KEGG_Gene_Orthology_Enzyme_Rclass_Reaction_Module_Pathway_Compound
phenylpyruvate	0.529101	0.0158	0.0186	Cox15	0.735943	0.0382	0.1872	KEGG_Gene_Module_Pathway_Enzyme_Rclass_Reaction_Compound
phenylpyruvate	0.529101	0.0158	0.0186	Dctpp1	1.2295	0.0478	0.472	KEGG_Gene_Orthology_Reaction_Rclass_Enzyme_Pathway_Compound
phenylpyruvate	0.529101	0.0158	0.0186	Ddx5	0.832362	0.0368	0.8911	KEGG_Gene_Orthology_Enzyme_Rclass_Reaction_Module_Pathway_Compound
phenylpyruvate	0.529101	0.0158	0.0186	Dgkd	1.2826	0.0197	0.9148	KEGG_Gene_Orthology_Reaction_Rclass_Enzyme_Pathway_Compound
phenylpyruvate	0.529101	0.0158	0.0186	Dna2	1.4474	0.035	0.0583	KEGG_Gene_Orthology_Enzyme_Rclass_Reaction_Module_Pathway_Compound
phenylpyruvate	0.529101	0.0158	0.0186	E2f1	0.53582	0.0441	0.0529	KEGG_Gene_Module_Pathway_Orthology_Rclass_Reaction_Compound
phenylpyruvate	0.529101	0.0158	0.0186	Ephb4	1.3326	0.0464	0.1118	KEGG_Gene_Orthology_Enzyme_Rclass_Reaction_Module_Pathway_Compound
phenylpyruvate	0.529101	0.0158	0.0186	Erbb3	1.604	0.0445	0.6908	KEGG_Gene_Orthology_Enzyme_Rclass_Reaction_Module_Pathway_Compound
phenylpyruvate	0.529101	0.0158	0.0186	Fmo3	13.6028	0.0295	0.051	KEGG_Gene_Pathway_Drug_Target_Orthology_Rclass_Reaction_Compound
phenylpyruvate	0.529101	0.0158	0.0186	Gapdh	0.780762	0.0368	0.1171	KEGG_Gene_Module_Pathway_Compound
phenylpyruvate	0.529101	0.0158	0.0186	Gemin7	0.857265	0.0442	0.8207	KEGG_Gene_Module_Pathway_Orthology_Rclass_Reaction_Compound
phenylpyruvate	0.529101	0.0158	0.0186	Gne	1.5292	0.0353	0.9279	KEGG_Gene_Orthology_Reaction_Rclass_Enzyme_Pathway_Compound
phenylpyruvate	0.529101	0.0158	0.0186	Impdh2	1.2673	0.043	0.3311	KEGG_Gene_Module_Reaction_Rclass_Pathway_Compound
phenylpyruvate	0.529101	0.0158	0.0186	Itpkb	0.771605	0.039	0.1448	KEGG_Gene_Orthology_Reaction_Rclass_Pathway_Compound
phenylpyruvate	0.529101	0.0158	0.0186	Kat7	1.1336	0.0447	0.9408	KEGG_Gene_Orthology_Enzyme_Rclass_Reaction_Compound
phenylpyruvate	0.529101	0.0158	0.0186	Lipe	1.3837	0.0394	0.2037	KEGG_Gene_Orthology_Enzyme_Rclass_Reaction_Module_Pathway_Compound
phenylpyruvate	0.529101	0.0158	0.0186	Man2a1	0.710126	0.039	0.3044	KEGG_Gene_Module_Glycan_Pathway_Compound
phenylpyruvate	0.529101	0.0158	0.0186	Map1lc3b	1.2646	0.0385	0.3927	KEGG_Gene_Pathway_Drug_Disease_Orthology_Enzyme_Compound
phenylpyruvate	0.529101	0.0158	0.0186	Map3k5	1.6788	0.0102	0.3968	KEGG_Gene_Orthology_Enzyme_Rclass_Reaction_Module_Pathway_Compound
phenylpyruvate	0.529101	0.0158	0.0186	Map3k7	0.723327	0.0102	0.9913	KEGG_Gene_Orthology_Enzyme_Rclass_Reaction_Module_Pathway_Compound
phenylpyruvate	0.529101	0.0158	0.0186	Map3k7	0.78456	0.0397	0.9724	KEGG_Gene_Orthology_Enzyme_Rclass_Reaction_Module_Pathway_Compound
phenylpyruvate	0.529101	0.0158	0.0186	Mapk12	1.2722	0.0337	0.278	KEGG_Gene_Orthology_Enzyme_Rclass_Reaction_Module_Pathway_Compound
phenylpyruvate	0.529101	0.0158	0.0186	Nagpa	0.733999	0.0353	0.5616	KEGG_Gene_Orthology_Enzyme_Rclass_Reaction_Module_Pathway_Compound
phenylpyruvate	0.529101	0.0158	0.0186	Ncstn	1.1966	0.039	0.9933	KEGG_Gene_Module_Pathway_Disease_Orthology_Rclass_Reaction_Compound
phenylpyruvate	0.529101	0.0158	0.0186	ND4L	0.854628	0.043	0.0871	KEGG_Gene_Orthology_Enzyme_Rclass_Reaction_Compound
phenylpyruvate	0.529101	0.0158	0.0186	Ndufv3	0.765462	0.0408	0.3008	KEGG_Gene_Module_Orthology_Enzyme_Rclass_Reaction_Compound
phenylpyruvate	0.529101	0.0158	0.0186	Nmrk1	1.8514	0.0339	0.503	KEGG_Gene_Orthology_Reaction_Rclass_Enzyme_Pathway_Compound
phenylpyruvate	0.529101	0.0158	0.0186	Notum	1.5258	0.0368	0.1187	KEGG_Gene_Orthology_Reaction_Rclass_Pathway_Module_Compound
phenylpyruvate	0.529101	0.0158	0.0186	Oxct2b	1.8468	0.034	0.3831	KEGG_Gene_Orthology_Reaction_Rclass_Pathway_Compound
phenylpyruvate	0.529101	0.0158	0.0186	Pcca	0.751145	0.0186	0.0946	KEGG_Gene_Module_Pathway_Enzyme_Compound
phenylpyruvate	0.529101	0.0158	0.0186	Pigq	0.769408	0.049	0.4129	KEGG_Gene_Pathway_Glycan_Orthology_Rclass_Reaction_Compound
phenylpyruvate	0.529101	0.0158	0.0186	Pkm	0.757461	0.0495	0.5381	KEGG_Gene_Module_Pathway_Compound
phenylpyruvate	0.529101	0.0158	0.0186	Pla2g16	7.7958	0.0329	0.0588	KEGG_Gene_Orthology_Reaction_Rclass_Pathway_Module_Compound
phenylpyruvate	0.529101	0.0158	0.0186	Ppox	0.727114	0.0245	0.8952	KEGG_Gene_Orthology_Module_Reaction_Rclass_Enzyme_Compound
phenylpyruvate	0.529101	0.0158	0.0186	Ppt2	1.2631	0.021	0.6905	KEGG_Gene_Orthology_Rclass_Reaction_Compound
phenylpyruvate	0.529101	0.0158	0.0186	Prkacb	1.1614	0.0443	0.8239	KEGG_Gene_Orthology_Enzyme_Rclass_Reaction_Module_Pathway_Compound
phenylpyruvate	0.529101	0.0158	0.0186	Recql	0.774054	0.0406	0.2065	KEGG_Gene_Orthology_Enzyme_Rclass_Reaction_Module_Pathway_Compound
phenylpyruvate	0.529101	0.0158	0.0186	Ripk1	1.3021	0.0445	0.4129	KEGG_Gene_Orthology_Enzyme_Rclass_Reaction_Module_Pathway_Compound
phenylpyruvate	0.529101	0.0158	0.0186	Rpe	0.695314	0.0267	0.997	KEGG_Gene_Module_Pathway_Compound
phenylpyruvate	0.529101	0.0158	0.0186	Ryk	1.4798	0.0344	0.5986	KEGG_Gene_Orthology_Enzyme_Rclass_Reaction_Module_Pathway_Compound
phenylpyruvate	0.529101	0.0158	0.0186	Sart1	0.722543	0.0412	0.7687	KEGG_Gene_Module_Pathway_Disease_Orthology_Rclass_Reaction_Compound
phenylpyruvate	0.529101	0.0158	0.0186	Sdha	0.797957	0.041	0.8649	KEGG_Gene_Module_Pathway_Orthology_Enzyme_Compound
phenylpyruvate	0.529101	0.0158	0.0186	Setd1b	1.6229	0.0153	0.0695	KEGG_Gene_Orthology_Rclass_Reaction_Compound
phenylpyruvate	0.529101	0.0158	0.0186	Slc39a8	1.2923	0.043	0.1025	KEGG_Gene_Pathway_Drug_Disease_Orthology_Enzyme_Compound
phenylpyruvate	0.529101	0.0158	0.0186	Smpd1	0.857927	0.036	0.0713	KEGG_Gene_Orthology_Reaction_Rclass_Pathway_Module_Compound
phenylpyruvate	0.529101	0.0158	0.0186	Snrk	0.655394	0.0336	0.4981	KEGG_Gene_Orthology_Enzyme_Rclass_Reaction_Module_Pathway_Compound
phenylpyruvate	0.529101	0.0158	0.0186	Socs2	3.5109	0.0242	0.1557	KEGG_Gene_Module_Pathway_Disease_Orthology_Enzyme_Compound
phenylpyruvate	0.529101	0.0158	0.0186	Socs3	2.8446	0.0205	0.1914	KEGG_Gene_Module_Pathway_Disease_Orthology_Enzyme_Compound
phenylpyruvate	0.529101	0.0158	0.0186	Stam2	0.74195	0.0465	0.3555	KEGG_Gene_Module_Pathway_Disease_Orthology_Rclass_Reaction_Compound
phenylpyruvate	0.529101	0.0158	0.0186	Suv420h2	0.83654	0.0382	0.1716	KEGG_Gene_Orthology_Rclass_Reaction_Compound
phenylpyruvate	0.529101	0.0158	0.0186	Taok3	1.3309	0.0475	0.5829	KEGG_Gene_Orthology_Enzyme_Rclass_Reaction_Module_Pathway_Compound
phenylpyruvate	0.529101	0.0158	0.0186	Thoc7	0.629921	0.039	0.7272	KEGG_Gene_Module_Pathway_Orthology_Rclass_Reaction_Compound
phenylpyruvate	0.529101	0.0158	0.0186	Tk1	2.1575	0.0307	0.3896	KEGG_Gene_Orthology_Reaction_Rclass_Enzyme_Pathway_Compound
phenylpyruvate	0.529101	0.0158	0.0186	Tk1	2.0856	0.039	0.5886	KEGG_Gene_Orthology_Reaction_Rclass_Enzyme_Pathway_Compound
phenylpyruvate	0.529101	0.0158	0.0186	Tm7sf2	1.6735	0.0393	0.4019	KEGG_Gene_Module_Reaction_Rclass_Pathway_Compound
phenylpyruvate	0.529101	0.0158	0.0186	Uck2	1.3276	0.0389	0.3061	KEGG_Gene_Orthology_Reaction_Rclass_Enzyme_Pathway_Compound
phenylpyruvate	0.529101	0.0158	0.0186	Upb1	1.2865	0.046	0.5348	KEGG_Gene_Orthology_Reaction_Rclass_Pathway_Compound
phenylpyruvate	0.529101	0.0158	0.0186	Vcp	0.752955	0.0232	0.0901	KEGG_Gene_Module_Pathway_Disease_Orthology_Rclass_Reaction_Compound
phenylpyruvate	0.529101	0.0158	0.0186	Vcp	0.813736	0.0499	0.7205	KEGG_Gene_Module_Pathway_Disease_Orthology_Rclass_Reaction_Compound
phenylpyruvate	0.529101	0.0158	0.0186	Vps28	1.2296	0.0443	0.0617	KEGG_Gene_Module_Pathway_Disease_Orthology_Rclass_Reaction_Compound
phenylpyruvate	0.529101	0.0158	0.0186	Vps37d	0.395789	0.0214	0.992	KEGG_Gene_Module_Pathway_Disease_Orthology_Rclass_Reaction_Compound
taurocyamine	0.359712	0.0262	0.0417	Abat	1.9477	0.0296	0.0854	KEGG_Gene_Orthology_Reaction_Enzyme_Pathway_Compound
taurocyamine	0.359712	0.0262	0.0417	Acadl	1.4826	0.0307	0.9742	KEGG_Gene_Module_Reaction_Rclass_Orthology_Pathway_Compound
taurocyamine	0.359712	0.0262	0.0417	Acvr2a	1.5726	0.0156	0.148	KEGG_Gene_Orthology_Enzyme_Rclass_Reaction_Compound
taurocyamine	0.359712	0.0262	0.0417	Acvr2b	1.9177	0.0348	0.0736	KEGG_Gene_Orthology_Enzyme_Rclass_Reaction_Compound
taurocyamine	0.359712	0.0262	0.0417	Aldh3a2	2.3133	0.0418	0.0801	KEGG_Gene_Module_Pathway_Enzyme_Compound
taurocyamine	0.359712	0.0262	0.0417	Asah1	1.3244	0.0469	0.9018	KEGG_Gene_Orthology_Reaction_Rclass_Enzyme_Pathway_Compound
taurocyamine	0.359712	0.0262	0.0417	Auh	1.2136	0.0406	0.1655	KEGG_Gene_Module_Reaction_Rclass_Enzyme_Compound
taurocyamine	0.359712	0.0262	0.0417	BC021891	1.5854	0.0211	0.8839	KEGG_Gene_Orthology_Enzyme_Rclass_Reaction_Compound
taurocyamine	0.359712	0.0262	0.0417	Bcat2	1.4962	0.0355	0.301	KEGG_Gene_Orthology_Reaction_Rclass_Pathway_Compound
taurocyamine	0.359712	0.0262	0.0417	Bmp4	1.5729	0.0232	0.1876	KEGG_Gene_Module_Orthology_Enzyme_Rclass_Reaction_Compound
taurocyamine	0.359712	0.0262	0.0417	Bnip3	1.4721	0.0319	0.4012	KEGG_Gene_Pathway_Module_Orthology_Reaction_Rclass_Enzyme_Compound
taurocyamine	0.359712	0.0262	0.0417	Camk2d	0.754603	0.0156	0.418	KEGG_Gene_Orthology_Enzyme_Rclass_Reaction_Compound
taurocyamine	0.359712	0.0262	0.0417	Cdc25a	1.3716	0.0346	0.5981	KEGG_Gene_Module_Orthology_Enzyme_Rclass_Reaction_Compound
taurocyamine	0.359712	0.0262	0.0417	Cdk4	1.1434	0.0408	0.2219	KEGG_Gene_Orthology_Enzyme_Rclass_Reaction_Compound
taurocyamine	0.359712	0.0262	0.0417	Cdkn1b	1.3841	0.0129	0.0577	KEGG_Gene_Pathway_Module_Orthology_Reaction_Rclass_Enzyme_Compound
taurocyamine	0.359712	0.0262	0.0417	Chd3	1.5894	0.0307	0.6073	KEGG_Gene_Orthology_Enzyme_Rclass_Reaction_Compound
taurocyamine	0.359712	0.0262	0.0417	Chd6	1.299	0.0359	0.1213	KEGG_Gene_Orthology_Enzyme_Rclass_Reaction_Compound
taurocyamine	0.359712	0.0262	0.0417	Chd8	1.4224	0.0262	0.2216	KEGG_Gene_Orthology_Enzyme_Rclass_Reaction_Compound
taurocyamine	0.359712	0.0262	0.0417	Clk4	1.3324	0.0336	0.9482	KEGG_Gene_Orthology_Enzyme_Rclass_Reaction_Compound
taurocyamine	0.359712	0.0262	0.0417	Cox15	0.735943	0.0382	0.1872	KEGG_Gene_Module_Pathway_Enzyme_Rclass_Reaction_Compound
taurocyamine	0.359712	0.0262	0.0417	Dctpp1	1.2295	0.0478	0.472	KEGG_Gene_Orthology_Rclass_Reaction_Compound
taurocyamine	0.359712	0.0262	0.0417	Ddx5	0.832362	0.0368	0.8911	KEGG_Gene_Orthology_Enzyme_Rclass_Reaction_Compound
taurocyamine	0.359712	0.0262	0.0417	Dgkd	1.2826	0.0197	0.9148	KEGG_Gene_Orthology_Rclass_Reaction_Compound
taurocyamine	0.359712	0.0262	0.0417	Dna2	1.4474	0.035	0.0583	KEGG_Gene_Orthology_Enzyme_Rclass_Reaction_Compound
taurocyamine	0.359712	0.0262	0.0417	E2f1	0.53582	0.0441	0.0529	KEGG_Gene_Module_Orthology_Enzyme_Rclass_Reaction_Compound
taurocyamine	0.359712	0.0262	0.0417	Ephb4	1.3326	0.0464	0.1118	KEGG_Gene_Orthology_Enzyme_Rclass_Reaction_Compound
taurocyamine	0.359712	0.0262	0.0417	Erbb3	1.604	0.0445	0.6908	KEGG_Gene_Orthology_Enzyme_Rclass_Reaction_Compound
taurocyamine	0.359712	0.0262	0.0417	Ganc	1.3334	0.0389	0.6072	KEGG_Gene_Pathway_Module_Reaction_Rclass_Enzyme_Compound
taurocyamine	0.359712	0.0262	0.0417	Gapdh	0.780762	0.0368	0.1171	KEGG_Gene_Module_Orthology_Rclass_Reaction_Compound
taurocyamine	0.359712	0.0262	0.0417	Gemin7	0.857265	0.0442	0.8207	KEGG_Gene_Module_Orthology_Enzyme_Rclass_Reaction_Compound
taurocyamine	0.359712	0.0262	0.0417	Gne	1.5292	0.0353	0.9279	KEGG_Gene_Orthology_Rclass_Reaction_Compound
taurocyamine	0.359712	0.0262	0.0417	Gpx7	1.4809	0.0485	0.9512	KEGG_Gene_Pathway_Module_Reaction_Rclass_Enzyme_Compound
taurocyamine	0.359712	0.0262	0.0417	Hmox2	1.2708	0.046	0.7123	KEGG_Gene_Orthology_Pathway_Module_Reaction_Rclass_Enzyme_Compound
taurocyamine	0.359712	0.0262	0.0417	Ifnar2	1.3541	0.039	0.42	KEGG_Gene_Pathway_Module_Orthology_Reaction_Rclass_Enzyme_Compound
taurocyamine	0.359712	0.0262	0.0417	Ifnar2	1.2875	0.0252	0.6653	KEGG_Gene_Pathway_Module_Orthology_Reaction_Rclass_Enzyme_Compound
taurocyamine	0.359712	0.0262	0.0417	Il6ra	1.9399	0.0237	0.4462	KEGG_Gene_Pathway_Module_Orthology_Reaction_Rclass_Enzyme_Compound
taurocyamine	0.359712	0.0262	0.0417	Impdh2	1.2673	0.043	0.3311	KEGG_Gene_Module_Reaction_Rclass_Enzyme_Compound
taurocyamine	0.359712	0.0262	0.0417	Itpkb	0.771605	0.039	0.1448	KEGG_Gene_Orthology_Rclass_Reaction_Compound
taurocyamine	0.359712	0.0262	0.0417	Lipe	1.3837	0.0394	0.2037	KEGG_Gene_Pathway_Module_Orthology_Reaction_Rclass_Enzyme_Compound
taurocyamine	0.359712	0.0262	0.0417	Lpar2	0.657289	0.0211	0.7263	KEGG_Gene_Pathway_Module_Orthology_Reaction_Rclass_Enzyme_Compound
taurocyamine	0.359712	0.0262	0.0417	Lpar6	1.3965	0.0153	0.1506	KEGG_Gene_Pathway_Module_Orthology_Reaction_Rclass_Enzyme_Compound
taurocyamine	0.359712	0.0262	0.0417	Man2a1	0.710126	0.039	0.3044	KEGG_Gene_Orthology_Module_Pathway_Rclass_Reaction_Compound
taurocyamine	0.359712	0.0262	0.0417	Map3k5	1.6788	0.0102	0.3968	KEGG_Gene_Orthology_Enzyme_Rclass_Reaction_Compound
taurocyamine	0.359712	0.0262	0.0417	Map3k7	0.723327	0.0102	0.9913	KEGG_Gene_Orthology_Enzyme_Rclass_Reaction_Compound
taurocyamine	0.359712	0.0262	0.0417	Map3k7	0.78456	0.0397	0.9724	KEGG_Gene_Orthology_Enzyme_Rclass_Reaction_Compound
taurocyamine	0.359712	0.0262	0.0417	Mapk12	1.2722	0.0337	0.278	KEGG_Gene_Orthology_Enzyme_Rclass_Reaction_Compound
taurocyamine	0.359712	0.0262	0.0417	Mcl1	1.2182	0.0397	0.3974	KEGG_Gene_Pathway_Module_Orthology_Reaction_Rclass_Enzyme_Compound
taurocyamine	0.359712	0.0262	0.0417	Mob1b	0.75884	0.043	0.8034	KEGG_Gene_Module_Orthology_Enzyme_Rclass_Reaction_Compound
taurocyamine	0.359712	0.0262	0.0417	Ncstn	1.1966	0.039	0.9933	KEGG_Gene_Module_Pathway_Disease_Orthology_Rclass_Reaction_Compound
taurocyamine	0.359712	0.0262	0.0417	Ndufv3	0.765462	0.0408	0.3008	KEGG_Gene_Module_Pathway_Enzyme_Rclass_Reaction_Compound
taurocyamine	0.359712	0.0262	0.0417	Nmrk1	1.8514	0.0339	0.503	KEGG_Gene_Orthology_Rclass_Reaction_Compound
taurocyamine	0.359712	0.0262	0.0417	Nup54	0.610911	0.0269	0.6428	KEGG_Gene_Module_Pathway_Disease_Orthology_Rclass_Reaction_Compound
taurocyamine	0.359712	0.0262	0.0417	Oxct2b	1.8468	0.034	0.3831	KEGG_Gene_Pathway_Module_Reaction_Rclass_Enzyme_Compound
taurocyamine	0.359712	0.0262	0.0417	Papd7	1.3682	0.0307	0.9527	KEGG_Gene_Module_Orthology_Enzyme_Rclass_Reaction_Compound
taurocyamine	0.359712	0.0262	0.0417	Pcca	0.751145	0.0186	0.0946	KEGG_Gene_Orthology_Reaction_Rclass_Enzyme_Compound
taurocyamine	0.359712	0.0262	0.0417	Pkm	0.757461	0.0495	0.5381	KEGG_Gene_Orthology_Rclass_Reaction_Compound
taurocyamine	0.359712	0.0262	0.0417	Pla2g16	7.7958	0.0329	0.0588	KEGG_Gene_Pathway_Module_Reaction_Rclass_Enzyme_Compound
taurocyamine	0.359712	0.0262	0.0417	Ppox	0.727114	0.0245	0.8952	KEGG_Gene_Orthology_Module_Pathway_Rclass_Reaction_Compound
taurocyamine	0.359712	0.0262	0.0417	Ppt2	1.2631	0.021	0.6905	KEGG_Gene_Orthology_Reaction_Rclass_Enzyme_Pathway_Compound
taurocyamine	0.359712	0.0262	0.0417	Prkacb	1.1614	0.0443	0.8239	KEGG_Gene_Orthology_Enzyme_Rclass_Reaction_Compound
taurocyamine	0.359712	0.0262	0.0417	Rbl2	1.4364	0.046	0.3755	KEGG_Gene_Pathway_Module_Orthology_Reaction_Rclass_Enzyme_Compound
taurocyamine	0.359712	0.0262	0.0417	Recql	0.774054	0.0406	0.2065	KEGG_Gene_Orthology_Enzyme_Rclass_Reaction_Compound
taurocyamine	0.359712	0.0262	0.0417	Ripk1	1.3021	0.0445	0.4129	KEGG_Gene_Orthology_Enzyme_Rclass_Reaction_Compound
taurocyamine	0.359712	0.0262	0.0417	Rpe	0.695314	0.0267	0.997	KEGG_Gene_Module_Pathway_Rclass_Reaction_Compound
taurocyamine	0.359712	0.0262	0.0417	Ryk	1.4798	0.0344	0.5986	KEGG_Gene_Orthology_Enzyme_Rclass_Reaction_Compound
taurocyamine	0.359712	0.0262	0.0417	Sart1	0.722543	0.0412	0.7687	KEGG_Gene_Module_Orthology_Enzyme_Rclass_Reaction_Compound
taurocyamine	0.359712	0.0262	0.0417	Sdha	0.797957	0.041	0.8649	KEGG_Gene_Module_Reaction_Rclass_Enzyme_Compound
taurocyamine	0.359712	0.0262	0.0417	Setd1b	1.6229	0.0153	0.0695	KEGG_Gene_Orthology_Rclass_Reaction_Module_Pathway_Enzyme_Compound
taurocyamine	0.359712	0.0262	0.0417	Sirt1	1.3252	0.032	0.0596	KEGG_Gene_Pathway_Module_Orthology_Reaction_Rclass_Enzyme_Compound
taurocyamine	0.359712	0.0262	0.0417	Smpd1	0.857927	0.036	0.0713	KEGG_Gene_Pathway_Module_Reaction_Rclass_Enzyme_Compound
taurocyamine	0.359712	0.0262	0.0417	Snrk	0.655394	0.0336	0.4981	KEGG_Gene_Orthology_Enzyme_Rclass_Reaction_Compound
taurocyamine	0.359712	0.0262	0.0417	Socs2	3.5109	0.0242	0.1557	KEGG_Gene_Module_Orthology_Enzyme_Rclass_Reaction_Compound
taurocyamine	0.359712	0.0262	0.0417	Socs3	2.8446	0.0205	0.1914	KEGG_Gene_Module_Orthology_Enzyme_Rclass_Reaction_Compound
taurocyamine	0.359712	0.0262	0.0417	Stam2	0.74195	0.0465	0.3555	KEGG_Gene_Module_Pathway_Orthology_Rclass_Reaction_Compound
taurocyamine	0.359712	0.0262	0.0417	Suv420h2	0.83654	0.0382	0.1716	KEGG_Gene_Orthology_Rclass_Reaction_Module_Pathway_Enzyme_Compound
taurocyamine	0.359712	0.0262	0.0417	Taok3	1.3309	0.0475	0.5829	KEGG_Gene_Orthology_Enzyme_Rclass_Reaction_Compound
taurocyamine	0.359712	0.0262	0.0417	Tead1	0.733084	0.0207	0.0885	KEGG_Gene_Module_Orthology_Enzyme_Rclass_Reaction_Compound
taurocyamine	0.359712	0.0262	0.0417	Thoc7	0.629921	0.039	0.7272	KEGG_Gene_Module_Orthology_Enzyme_Rclass_Reaction_Compound
taurocyamine	0.359712	0.0262	0.0417	Tk1	2.1575	0.0307	0.3896	KEGG_Gene_Orthology_Rclass_Reaction_Compound
taurocyamine	0.359712	0.0262	0.0417	Tk1	2.0856	0.039	0.5886	KEGG_Gene_Orthology_Rclass_Reaction_Compound
taurocyamine	0.359712	0.0262	0.0417	Uck2	1.3276	0.0389	0.3061	KEGG_Gene_Orthology_Rclass_Reaction_Compound
taurocyamine	0.359712	0.0262	0.0417	Upb1	1.2865	0.046	0.5348	KEGG_Gene_Orthology_Reaction_Rclass_Pathway_Compound
taurocyamine	0.359712	0.0262	0.0417	Vcp	0.752955	0.0232	0.0901	KEGG_Gene_Module_Pathway_Disease_Orthology_Rclass_Reaction_Compound
taurocyamine	0.359712	0.0262	0.0417	Vcp	0.813736	0.0499	0.7205	KEGG_Gene_Module_Pathway_Disease_Orthology_Rclass_Reaction_Compound
taurocyamine	0.359712	0.0262	0.0417	Vegfa	1.4372	0.0261	0.2147	KEGG_Gene_Pathway_Module_Orthology_Reaction_Rclass_Enzyme_Compound
taurodeoxycholate	0.37037	0.0178	0.049	Acadl	1.4826	0.0307	0.9742	KEGG_Gene_Module_Pathway_Disease_Orthology_Rclass_Reaction_Compound
taurodeoxycholate	0.37037	0.0178	0.049	Aldh3a2	2.3133	0.0418	0.0801	KEGG_Gene_Module_Orthology_Enzyme_Rclass_Reaction_Compound
taurodeoxycholate	0.37037	0.0178	0.049	Bcat2	1.4962	0.0355	0.301	KEGG_Gene_Orthology_Module_Reaction_Rclass_Enzyme_Compound
taurodeoxycholate	0.37037	0.0178	0.049	Ch25h	0.503145	0.039	0.3242	KEGG_Gene_Pathway_Module_Reaction_Rclass_Orthology_Enzyme_Compound
taurodeoxycholate	0.37037	0.0178	0.049	Cox15	0.735943	0.0382	0.1872	KEGG_Gene_Orthology_Pathway_Module_Reaction_Rclass_Rpair_Compound
taurodeoxycholate	0.37037	0.0178	0.049	Dctpp1	1.2295	0.0478	0.472	KEGG_Gene_Pathway_Module_Reaction_Rclass_Enzyme_Compound
taurodeoxycholate	0.37037	0.0178	0.049	Gapdh	0.780762	0.0368	0.1171	KEGG_Gene_Module_Pathway_Rclass_Reaction_Compound
taurodeoxycholate	0.37037	0.0178	0.049	Gpx7	1.4809	0.0485	0.9512	KEGG_Gene_Pathway_Module_Reaction_Rclass_Orthology_Enzyme_Compound
taurodeoxycholate	0.37037	0.0178	0.049	Hmox2	1.2708	0.046	0.7123	KEGG_Gene_Orthology_Pathway_Module_Reaction_Rclass_Rpair_Compound
taurodeoxycholate	0.37037	0.0178	0.049	Impdh2	1.2673	0.043	0.3311	KEGG_Gene_Module_Pathway_Orthology_Rclass_Reaction_Compound
taurodeoxycholate	0.37037	0.0178	0.049	Oxct2b	1.8468	0.034	0.3831	KEGG_Gene_Orthology_Rclass_Reaction_Module_Pathway_Enzyme_Compound
taurodeoxycholate	0.37037	0.0178	0.049	Pkm	0.757461	0.0495	0.5381	KEGG_Gene_Module_Pathway_Rclass_Reaction_Compound
taurodeoxycholate	0.37037	0.0178	0.049	Ppox	0.727114	0.0245	0.8952	KEGG_Gene_Orthology_Module_Pathway_Rclass_Reaction_Compound
taurodeoxycholate	0.37037	0.0178	0.049	Ppt2	1.2631	0.021	0.6905	KEGG_Gene_Orthology_Rclass_Reaction_Module_Pathway_Enzyme_Compound
taurodeoxycholate	0.37037	0.0178	0.049	Rpe	0.695314	0.0267	0.997	KEGG_Gene_Module_Pathway_Orthology_Rclass_Reaction_Compound
taurodeoxycholate	0.37037	0.0178	0.049	Tk1	2.1575	0.0307	0.3896	KEGG_Gene_Pathway_Module_Reaction_Rclass_Enzyme_Compound
taurodeoxycholate	0.37037	0.0178	0.049	Tk1	2.0856	0.039	0.5886	KEGG_Gene_Pathway_Module_Reaction_Rclass_Enzyme_Compound
taurodeoxycholate	0.37037	0.0178	0.049	Uck2	1.3276	0.0389	0.3061	KEGG_Gene_Pathway_Module_Reaction_Rclass_Enzyme_Compound
taurodeoxycholate	0.37037	0.0178	0.049	Upb1	1.2865	0.046	0.5348	KEGG_Gene_Orthology_Rclass_Reaction_Compound
trimethylamine N-oxide	8.09	2.68e-07	0.0003	Abat	1.9477	0.0296	0.0854	KEGG_Gene_Orthology_Reaction_Rclass_Pathway_Compound
trimethylamine N-oxide	8.09	2.68e-07	0.0003	Acadl	1.4826	0.0307	0.9742	KEGG_Gene_Module_Reaction_Rclass_Orthology_Pathway_Compound
trimethylamine N-oxide	8.09	2.68e-07	0.0003	Acvr2a	1.5726	0.0156	0.148	KEGG_Gene_Module_Pathway_Disease_Orthology_Rclass_Reaction_Compound
trimethylamine N-oxide	8.09	2.68e-07	0.0003	Acvr2b	1.9177	0.0348	0.0736	KEGG_Gene_Module_Pathway_Disease_Orthology_Rclass_Reaction_Compound
trimethylamine N-oxide	8.09	2.68e-07	0.0003	Aldh3a2	2.3133	0.0418	0.0801	KEGG_Gene_Module_Reaction_Rclass_Pathway_Compound
trimethylamine N-oxide	8.09	2.68e-07	0.0003	Asah1	1.3244	0.0469	0.9018	KEGG_Gene_Module_Reaction_Rclass_Orthology_Pathway_Compound
trimethylamine N-oxide	8.09	2.68e-07	0.0003	Auh	1.2136	0.0406	0.1655	KEGG_Gene_Module_Reaction_Rclass_Pathway_Compound
trimethylamine N-oxide	8.09	2.68e-07	0.0003	Bcat2	1.4962	0.0355	0.301	KEGG_Gene_Orthology_Reaction_Rclass_Pathway_Compound
trimethylamine N-oxide	8.09	2.68e-07	0.0003	Bmp4	1.5729	0.0232	0.1876	KEGG_Gene_Module_Pathway_Disease_Orthology_Rclass_Reaction_Compound
trimethylamine N-oxide	8.09	2.68e-07	0.0003	Cox15	0.735943	0.0382	0.1872	KEGG_Gene_Orthology_Pathway_Compound
trimethylamine N-oxide	8.09	2.68e-07	0.0003	Dctpp1	1.2295	0.0478	0.472	KEGG_Gene_Orthology_Reaction_Rclass_Pathway_Compound
trimethylamine N-oxide	8.09	2.68e-07	0.0003	Dgkd	1.2826	0.0197	0.9148	KEGG_Gene_Orthology_Reaction_Rclass_Pathway_Compound
trimethylamine N-oxide	8.09	2.68e-07	0.0003	Fmo3	13.6028	0.0295	0.051	REACTOME_Protein_Complex_Catalysis_BiochemicalReaction_SmallMolecule
trimethylamine N-oxide	8.09	2.68e-07	0.0003	Gapdh	0.780762	0.0368	0.1171	KEGG_Gene_Module_Orthology_Pathway_Compound
trimethylamine N-oxide	8.09	2.68e-07	0.0003	Gne	1.5292	0.0353	0.9279	KEGG_Gene_Orthology_Reaction_Rclass_Pathway_Compound
trimethylamine N-oxide	8.09	2.68e-07	0.0003	Gpx7	1.4809	0.0485	0.9512	KEGG_Gene_Orthology_Reaction_Rclass_Pathway_Compound
trimethylamine N-oxide	8.09	2.68e-07	0.0003	Impdh2	1.2673	0.043	0.3311	KEGG_Gene_Module_Reaction_Rclass_Pathway_Compound
trimethylamine N-oxide	8.09	2.68e-07	0.0003	Itpkb	0.771605	0.039	0.1448	KEGG_Gene_Orthology_Reaction_Rclass_Pathway_Compound
trimethylamine N-oxide	8.09	2.68e-07	0.0003	ND4L	0.854628	0.043	0.0871	KEGG_Gene_Orthology_Enzyme_Rclass_Reaction_Compound
trimethylamine N-oxide	8.09	2.68e-07	0.0003	Ndufv3	0.765462	0.0408	0.3008	KEGG_Gene_Module_Orthology_Enzyme_Rclass_Reaction_Compound
trimethylamine N-oxide	8.09	2.68e-07	0.0003	Nmrk1	1.8514	0.0339	0.503	KEGG_Gene_Orthology_Reaction_Rclass_Pathway_Compound
trimethylamine N-oxide	8.09	2.68e-07	0.0003	Oxct2b	1.8468	0.034	0.3831	KEGG_Gene_Orthology_Reaction_Rclass_Pathway_Compound
trimethylamine N-oxide	8.09	2.68e-07	0.0003	Pcca	0.751145	0.0186	0.0946	KEGG_Gene_Orthology_Reaction_Rclass_Pathway_Compound
trimethylamine N-oxide	8.09	2.68e-07	0.0003	Pkm	0.757461	0.0495	0.5381	KEGG_Gene_Module_Orthology_Pathway_Compound
trimethylamine N-oxide	8.09	2.68e-07	0.0003	Ppt2	1.2631	0.021	0.6905	KEGG_Gene_Orthology_Reaction_Rclass_Pathway_Compound
trimethylamine N-oxide	8.09	2.68e-07	0.0003	Rpe	0.695314	0.0267	0.997	KEGG_Gene_Module_Orthology_Rclass_Reaction_Compound
trimethylamine N-oxide	8.09	2.68e-07	0.0003	Sart1	0.722543	0.0412	0.7687	KEGG_Gene_Module_Pathway_Disease_Orthology_Rclass_Reaction_Compound
trimethylamine N-oxide	8.09	2.68e-07	0.0003	Sdha	0.797957	0.041	0.8649	KEGG_Gene_Module_Orthology_Pathway_Compound
trimethylamine N-oxide	8.09	2.68e-07	0.0003	Smpd1	0.857927	0.036	0.0713	KEGG_Gene_Orthology_Reaction_Rclass_Pathway_Compound
trimethylamine N-oxide	8.09	2.68e-07	0.0003	Thoc7	0.629921	0.039	0.7272	KEGG_Gene_Module_Pathway_Disease_Orthology_Rclass_Reaction_Compound
trimethylamine N-oxide	8.09	2.68e-07	0.0003	Tk1	2.1575	0.0307	0.3896	KEGG_Gene_Orthology_Reaction_Rclass_Pathway_Compound
trimethylamine N-oxide	8.09	2.68e-07	0.0003	Tk1	2.0856	0.039	0.5886	KEGG_Gene_Orthology_Reaction_Rclass_Pathway_Compound
trimethylamine N-oxide	8.09	2.68e-07	0.0003	Uck2	1.3276	0.0389	0.3061	KEGG_Gene_Orthology_Reaction_Rclass_Pathway_Compound
trimethylamine N-oxide	8.09	2.68e-07	0.0003	Upb1	1.2865	0.046	0.5348	KEGG_Gene_Orthology_Reaction_Rclass_Pathway_Compound
